# Supplementary material
Source: MDPI journal article supplement (https://www.mdpi.com/1999-4893/14/6/177)
Supplement: s1 [file s1]

Archive with 4 entries (4 files):
- Column Naming Legend for data.pdf
- SUNHour_data.xlsx
- supplementary material.pdf
- UNVHour_data.xlsx
