# Supplementary material
Source: MDPI journal article supplement (https://www.mdpi.com/1999-4893/14/6/177)
Supplement: s1 [file s1 › SUNHour_data.xlsx]

## Sheet: SUN Hour
No	Date	GHI	Temp	RH	WS	WindDir	WindDir_SD	BP
1	01/03/2018 00:00:00	0	18.04	82.8	0.795	236.4	37.54	999.486
2	01/03/2018 01:00:00	0	17.64	87.4	0.811	237.8	29.31	1000.03
3	01/03/2018 02:00:00	0	16.79	88.7	0	0	0	1000.04
4	01/03/2018 03:00:00	0	15.78	90.8	0.393	78.18	10.62	999.727
5	01/03/2018 04:00:00	0	14.96	92.5	0.156	48.23	8.91	999.58
6	01/03/2018 05:00:00	0	14.66	92.9	0.944	74.47	15.88	999.463
7	01/03/2018 06:00:00	0	14.34	93.5	0.802	72.98	16.56	999.406
8	01/03/2018 07:00:00	7.83574	13.7	94	0.33	49.21	9.37	999.863
9	01/03/2018 08:00:00	154.641	15.43	88.4	0.303	61.01	15.07	1000.55
10	01/03/2018 09:00:00	323.342	19.13	71.2	0.322	9.2	28.31	1000.74
11	01/03/2018 10:00:00	580.734	21.4	61.24	0.968	265.8	39.99	1001.04
12	01/03/2018 11:00:00	760.317	23.11	49.69	1.349	227.4	34.07	1001.07
13	01/03/2018 12:00:00	871.355	24.61	48.46	1.814	256.7	48.03	1000.67
14	01/03/2018 13:00:00	972.596	26.48	40.7	1.558	209.5	63.85	1000.15
15	01/03/2018 14:00:00	983.002	27.71	34.74	1.727	127.5	82.3	999.345
16	01/03/2018 15:00:00	731.97	28.37	36.39	2.433	117.3	48.65	998.543
17	01/03/2018 16:00:00	727.525	27.8	41.54	4.355	135.3	34.05	997.874
18	01/03/2018 17:00:00	566.568	26.96	48.26	5.303	135	31.11	997.723
19	01/03/2018 18:00:00	350.281	25.53	51.12	5.824	126	30.35	997.805
20	01/03/2018 19:00:00	128.383	23.78	57.63	6.731	122.1	28.22	997.945
21	01/03/2018 20:00:00	5.44437	22.3	58.97	7.104	118.4	28.49	998.436
22	01/03/2018 21:00:00	0	21.32	60.49	7.582	115.2	27.18	999.166
23	01/03/2018 22:00:00	0	20.84	61.16	7.118	115.6	27.2	999.575
24	01/03/2018 23:00:00	0	20.53	63.13	6.617	118.8	28.15	999.734
25	02/03/2018 00:00:00	0	20.28	60.8	5.698	114.1	26.17	999.724
26	02/03/2018 01:00:00	0	20.41	59.25	5.503	109.7	28.85	999.507
27	02/03/2018 02:00:00	0	20.09	59.34	5.455	100.1	24.86	999.192
28	02/03/2018 03:00:00	0	19.67	60.4	6.007	114.1	26.67	998.674
29	02/03/2018 04:00:00	0	19.65	55.98	5.513	114.2	28.08	998.115
30	02/03/2018 05:00:00	0	20.1	52.23	4.751	117.8	30.19	997.81
31	02/03/2018 06:00:00	0	20.49	55.72	4.46	115.1	28.26	997.919
32	02/03/2018 07:00:00	4.51382	20.41	59.02	5	113.8	27.11	998.172
33	02/03/2018 08:00:00	140.878	21.32	55.28	5.507	106.9	24.5	998.467
34	02/03/2018 09:00:00	371.189	22.27	58.1	5.66	109.9	27.7	998.764
35	02/03/2018 10:00:00	585.127	22.81	54.11	6.158	117.2	27.89	999.037
36	02/03/2018 11:00:00	766.023	23.91	52.38	5.685	122.2	28.26	999.206
37	02/03/2018 12:00:00	888.176	25.03	48.39	4.871	125.2	30.16	998.954
38	02/03/2018 13:00:00	949.494	25.95	45.08	4.686	124.2	30.79	998.431
39	02/03/2018 14:00:00	914.957	26.6	43.8	4.605	127.9	30.78	998.03
40	02/03/2018 15:00:00	880.337	27.25	41.33	4.241	124.7	31.39	997.45
41	02/03/2018 16:00:00	746.04	27.55	40.76	4.176	128.9	32.11	996.589
42	02/03/2018 17:00:00	561.811	27.56	42.63	4.256	131.8	32.81	996.241
43	02/03/2018 18:00:00	343.624	26.71	47.28	4.614	133.6	32.03	996.152
44	02/03/2018 19:00:00	124.248	25.3	49.17	5.281	128.6	29	996.039
45	02/03/2018 20:00:00	4.22915	23.91	58.11	5.461	122.7	28.03	996.065
46	02/03/2018 21:00:00	0	22.23	64	6.291	114.5	26.21	996.496
47	02/03/2018 22:00:00	0	21.59	62.9	5.163	117.4	28.35	996.74
48	02/03/2018 23:00:00	0	21.57	61.17	4.978	114.2	26.82	996.716
49	03/03/2018 00:00:00	0	21.53	61.18	4.31	122.7	29.69	996.797
50	03/03/2018 01:00:00	0	21.22	57.76	3.47	128.1	31.88	996.869
51	03/03/2018 02:00:00	0	21.23	56.3	3.332	124.1	32.72	996.302
52	03/03/2018 03:00:00	0	20.73	64.36	2.624	152.2	44.5	995.919
53	03/03/2018 04:00:00	0	19.71	70.79	2.243	169.8	40.72	995.723
54	03/03/2018 05:00:00	0	18.22	74.87	1.002	203.1	20.92	995.772
55	03/03/2018 06:00:00	0	16.26	80.5	0	0	0	995.832
56	03/03/2018 07:00:00	3.78546	14.82	81.5	0.186	343.1	10.91	996.002
57	03/03/2018 08:00:00	145.055	16.9	69.05	0.019	227.3	2.488	996.093
58	03/03/2018 09:00:00	374.029	20.26	61.89	0.454	243.3	16.69	996.107
59	03/03/2018 10:00:00	587.574	23.14	47.95	0.858	245.5	27.3	996.454
60	03/03/2018 11:00:00	764.852	26.59	38.25	0.506	209.7	21.2	996.387
61	03/03/2018 12:00:00	893.435	28.92	30.5	1.35	224.8	37.54	996.229
62	03/03/2018 13:00:00	948.861	30.19	26.08	1.967	239	45.59	995.654
63	03/03/2018 14:00:00	947.095	30.96	32.87	2.876	245.8	46.69	995.107
64	03/03/2018 15:00:00	876.233	30.28	37.33	3.887	233.4	34.97	994.814
65	03/03/2018 16:00:00	741.968	30.09	36.86	3.645	243.5	34.52	994.373
66	03/03/2018 17:00:00	549.982	29.34	39.4	4.165	255	29.74	994.384
67	03/03/2018 18:00:00	331.642	29.3	40.75	3.495	241.3	56.71	994.016
68	03/03/2018 19:00:00	117.704	27.89	47.77	4.647	116.7	29.04	994.039
69	03/03/2018 20:00:00	3.2624	25.41	54.55	5.42	120.4	31.5	994.398
70	03/03/2018 21:00:00	0	23.91	59.03	5.527	127.1	31.59	995.259
71	03/03/2018 22:00:00	0	22.8	60.8	5.499	115.4	28.24	995.563
72	03/03/2018 23:00:00	0	22.38	60.06	2.768	138.3	38.49	995.455
73	04/03/2018 00:00:00	0	22.24	58.1	3.201	117.5	33.64	995.397
74	04/03/2018 01:00:00	0	21.42	66.12	1.895	133.1	43.81	995.228
75	04/03/2018 02:00:00	0	20.38	72.38	1.25	182.8	48.1	995.112
76	04/03/2018 03:00:00	0	18.46	76.37	0.254	14.8	45.39	995.124
77	04/03/2018 04:00:00	0	16.6	83.3	0.475	353.3	23.92	994.556
78	04/03/2018 05:00:00	0	15.61	85.8	0.528	351.8	23.79	994.465
79	04/03/2018 06:00:00	0	14.6	88.9	0.348	20.47	19.93	994.515
80	04/03/2018 07:00:00	4.42334	14.01	87.8	0.398	30.67	39.34	995.078
81	04/03/2018 08:00:00	126.989	15.77	75.86	0.306	54.16	14.64	995.663
82	04/03/2018 09:00:00	339.569	19.54	67.97	0.436	348.1	22.59	995.978
83	04/03/2018 10:00:00	547.705	23.09	52.53	0.525	301	17.93	996.312
84	04/03/2018 11:00:00	728.496	25.25	48.67	0.829	286	52.31	996.534
85	04/03/2018 12:00:00	856.413	26.8	42.8	1.272	216.9	44.06	996.394
86	04/03/2018 13:00:00	909.156	27.8	40.37	2.116	216.9	46.07	995.933
87	04/03/2018 14:00:00	860.875	27.67	48.69	3.903	249.2	32.87	995.52
88	04/03/2018 15:00:00	676.75	26.74	49.81	4.211	257.9	26.27	994.931
89	04/03/2018 16:00:00	604.838	27.34	46.9	4.023	260.8	29.64	994.525
90	04/03/2018 17:00:00	510.061	27.78	50.78	3.819	260.8	25.33	994.296
91	04/03/2018 18:00:00	291.134	27.3	45.59	2.404	216.8	75.38	994.468
92	04/03/2018 19:00:00	106.934	26.48	58.45	2.947	136.3	54.59	994.578
93	04/03/2018 20:00:00	2.64798	24.61	54.63	4.576	136.7	37.41	995.068
94	04/03/2018 21:00:00	0	23.3	59.91	5.948	126.5	30.17	995.691
95	04/03/2018 22:00:00	0	22.38	64.32	6.244	124.3	31.51	995.999
96	04/03/2018 23:00:00	0	21.79	62.08	6.014	121.9	30.36	996.179
97	05/03/2018 00:00:00	0	21.94	59.52	5.127	136.2	34.25	995.956
98	05/03/2018 01:00:00	0	21.92	56.89	5.223	146.9	35.1	995.597
99	05/03/2018 02:00:00	0	22	56.62	5.277	144.8	35.62	995.426
100	05/03/2018 03:00:00	0	21.65	64.8	4.071	152.4	45.44	995.024
101	05/03/2018 04:00:00	0.00786504	21.06	57.6	3.052	162.7	50.25	994.883
102	05/03/2018 05:00:00	0	20.87	64.17	2.311	167.7	39.5	994.665
103	05/03/2018 06:00:00	0.00641622	21.28	62.61	2.301	166.4	45.71	994.552
104	05/03/2018 07:00:00	2.94737	19.85	58.7	1.924	197.2	49.37	994.906
105	05/03/2018 08:00:00	130.127	22.63	52.26	3.714	120.6	31.77	995.161
106	05/03/2018 09:00:00	313.969	23.34	55.66	3.18	154.1	55.48	995.476
107	05/03/2018 10:00:00	577.312	23.85	50.43	2.322	239.7	34.2	996.107
108	05/03/2018 11:00:00	677.419	26.26	42.25	2.05	232.9	35.1	996.178
109	05/03/2018 12:00:00	694.016	27.51	37.59	2.235	229.5	34.95	996.019
110	05/03/2018 13:00:00	925.098	29.4	36.44	1.855	195.2	87.4	995.382
111	05/03/2018 14:00:00	880.034	30.35	39.12	2.439	113.8	61.16	994.787
112	05/03/2018 15:00:00	773.716	30.28	39.56	3.23	129.3	33.84	994.288
113	05/03/2018 16:00:00	660.582	30.31	41.29	3.767	120.4	31.97	993.753
114	05/03/2018 17:00:00	505.147	29.76	43.52	3.93	124.9	32.93	993.588
115	05/03/2018 18:00:00	327.335	29	47.82	4.441	118.3	29.31	993.57
116	05/03/2018 19:00:00	75.6897	27.09	53.98	4.858	121	29.05	993.731
117	05/03/2018 20:00:00	2.20138	25.28	59.72	5.412	123.2	29.31	994.302
118	05/03/2018 21:00:00	0	24.03	61.26	5.99	126.5	30.64	995
119	05/03/2018 22:00:00	0	23.08	67.96	5.923	123	30.78	995.817
120	05/03/2018 23:00:00	0	22.47	69	6.125	123.3	30.2	995.722
121	06/03/2018 00:00:00	0	22.12	69.41	5.812	123.3	32.79	995.434
122	06/03/2018 01:00:00	0	22.43	67.15	5.595	120.6	27.58	995.12
123	06/03/2018 02:00:00	0	22.38	67.57	4.519	130.1	33.18	995.147
124	06/03/2018 03:00:00	0	22.37	65.93	3.777	120.9	30.1	994.636
125	06/03/2018 04:00:00	0	22.03	68.07	3.181	141.4	37.64	994.325
126	06/03/2018 05:00:00	0	21.97	63.3	3.47	154.2	40.79	993.915
127	06/03/2018 06:00:00	0	21.72	70.81	2.33	167.2	48.1	994.166
128	06/03/2018 07:00:00	4.70867	19.05	80.7	0.973	228.4	40.07	994.456
129	06/03/2018 08:00:00	140.492	18.99	77.09	0.159	312.7	8.6	995.054
130	06/03/2018 09:00:00	288.975	21.66	66.79	0.423	226.4	20.11	995.474
131	06/03/2018 10:00:00	465.201	23.46	61.18	1.962	227	32.69	995.8
132	06/03/2018 11:00:00	536.783	24.6	57.63	2.059	234.7	34.79	996.312
133	06/03/2018 12:00:00	573.747	25.95	49.59	2.043	228.8	37.79	995.834
134	06/03/2018 13:00:00	666.245	26.92	47.7	1.763	221.4	38.73	995.491
135	06/03/2018 14:00:00	761.26	28.47	50.67	2.575	245.7	32.73	995.276
136	06/03/2018 15:00:00	574.394	27.4	57.82	4.127	247.9	34.18	994.761
137	06/03/2018 16:00:00	534.937	26.17	59.08	4.611	256	26.23	994.741
138	06/03/2018 17:00:00	414.971	25.85	55.5	3.656	248.7	34.3	994.679
139	06/03/2018 18:00:00	328.06	27.19	55.73	3.264	254.4	28.76	994.253
140	06/03/2018 19:00:00	102.244	25.81	65.79	2.107	255.8	35.32	994.162
141	06/03/2018 20:00:00	1.34799	23.49	62.03	2.899	162	55.28	994.185
142	06/03/2018 21:00:00	0	23.33	64.24	4.42	148.4	35.23	994.674
143	06/03/2018 22:00:00	0	22.96	64.56	4.643	133	35.76	995.249
144	06/03/2018 23:00:00	0	22.01	73.46	3.448	161.3	38.94	995.434
145	07/03/2018 00:00:00	0	21.65	66.02	3.076	164.5	51.79	995.625
146	07/03/2018 01:00:00	0	21.49	76.13	3.683	165	44.94	995.623
147	07/03/2018 02:00:00	0	19.86	79.23	1.692	192.7	52.47	995.763
148	07/03/2018 03:00:00	0	19.07	84.1	1.574	184.4	37.74	995.403
149	07/03/2018 04:00:00	0	18.43	85.4	1.503	201.9	44.03	995.273
150	07/03/2018 05:00:00	0	17.65	87.7	1.055	304.2	67.08	995.147
151	07/03/2018 06:00:00	0	16.9	87.5	0.807	82	77.35	995.158
152	07/03/2018 07:00:00	3.35059	16.98	90.6	1.485	293.3	76.43	995.613
153	07/03/2018 08:00:00	128.131	17.45	85.1	0.869	334.7	33.79	996.253
154	07/03/2018 09:00:00	352.097	20.27	73.34	0.789	272	40.37	996.674
155	07/03/2018 10:00:00	565.379	22.53	66.37	1.485	258.2	43.34	996.988
156	07/03/2018 11:00:00	724.763	24.79	58.46	1.358	239.6	52.42	996.898
157	07/03/2018 12:00:00	723.513	24.72	56.96	3.726	247.5	33.05	996.712
158	07/03/2018 13:00:00	801.026	24.87	56.58	4.1	248.3	33.83	996.557
159	07/03/2018 14:00:00	704.144	23.9	61.91	4.395	250.9	31.06	996.585
160	07/03/2018 15:00:00	746.477	23.65	62.36	5.027	254.4	29.01	996.385
161	07/03/2018 16:00:00	724.847	23.14	62.24	4.952	249.9	33.35	996.418
162	07/03/2018 17:00:00	503.721	22.15	67.26	5.077	236.2	35.82	996.597
163	07/03/2018 18:00:00	324.264	20.89	69.77	5.514	232.1	34.2	996.913
164	07/03/2018 19:00:00	83.1728	19.48	74.04	4.332	230	35.43	997.077
165	07/03/2018 20:00:00	0.805545	18.42	73.86	3.658	231.7	35.84	997.282
166	07/03/2018 21:00:00	0	18.23	73.9	2.958	232.4	33.6	997.896
167	07/03/2018 22:00:00	0	17.99	74.06	2.468	231	31.97	998.226
168	07/03/2018 23:00:00	0	17.83	70.75	2.403	222.7	29.63	998.181
169	08/03/2018 00:00:00	0	17.34	71.99	1.295	195.8	44.22	998.256
170	08/03/2018 01:00:00	0	15.94	74.75	0.81	120.4	50.89	998.317
171	08/03/2018 02:00:00	0	15.31	80	1.273	90.4	27.73	998.538
172	08/03/2018 03:00:00	0	14	79.85	0.857	59.31	18.17	998.534
173	08/03/2018 04:00:00	0	14.3	80.8	0.295	252.8	49.66	998.622
174	08/03/2018 05:00:00	0	13.38	81.1	0.77	68.58	20.55	998.711
175	08/03/2018 06:00:00	0	13.4	82.6	1.107	70.3	15.61	998.91
176	08/03/2018 07:00:00	5.06459	13.43	82.6	1.221	78.35	22.7	999.4
177	08/03/2018 08:00:00	111.87	15.69	75.65	0.791	264.6	74.64	999.793
178	08/03/2018 09:00:00	316.59	18.59	69.13	3.17	214.6	30.68	1000.5
179	08/03/2018 10:00:00	552.146	19.84	56.76	3.551	212.9	31.58	1000.59
180	08/03/2018 11:00:00	768.106	21.43	52.19	3.353	215.9	34.94	1000.7
181	08/03/2018 12:00:00	875.695	22.11	47	3.681	218.1	32.14	1000.37
182	08/03/2018 13:00:00	900.06	22.46	54.16	4.767	216.4	31.22	999.989
183	08/03/2018 14:00:00	948.15	22.2	52.54	5.499	214.6	27.98	999.846
184	08/03/2018 15:00:00	871.915	22.38	55.71	4.883	215.1	30.23	999.804
185	08/03/2018 16:00:00	720.407	22.02	62.28	4.507	218.9	33.51	999.832
186	08/03/2018 17:00:00	546.631	21.2	69.75	4.749	218.3	31.51	999.832
187	08/03/2018 18:00:00	327.142	20.27	67.1	5.105	211.4	26.24	999.966
188	08/03/2018 19:00:00	98.6527	19.47	72.72	4.616	210.5	23.56	1000.07
189	08/03/2018 20:00:00	0.49964	18.17	76.15	2.881	217.9	33.78	1000.29
190	08/03/2018 21:00:00	0	17.66	76.34	2.241	234.8	32.87	1000.45
191	08/03/2018 22:00:00	0	17.54	75.89	2.49	190.8	48.91	1000.89
192	08/03/2018 23:00:00	0	16.61	71.66	1.127	251.6	25.37	1001.08
193	09/03/2018 00:00:00	0	16.33	71.3	1.409	120	66.46	1000.97
194	09/03/2018 01:00:00	0	15.93	74.48	0.337	244	18.4	1000.95
195	09/03/2018 02:00:00	0	14.18	79.52	0.225	58.02	17.04	1000.82
196	09/03/2018 03:00:00	0	13.56	78.84	0.597	65.55	43.79	1000.26
197	09/03/2018 04:00:00	0	12.71	80.7	0.92	69.33	27.7	999.572
198	09/03/2018 05:00:00	0	12.32	80.6	0.699	68.45	15.27	999.06
199	09/03/2018 06:00:00	0	11.54	83.7	1.018	66.18	21.55	998.695
200	09/03/2018 07:00:00	9.91284	11.4	81.9	0.369	66.17	17.67	998.519
201	09/03/2018 08:00:00	80.0743	12.88	76.77	0.432	61.44	19.06	998.351
202	09/03/2018 09:00:00	257.834	15.79	69.05	0.52	350.2	45.95	998.565
203	09/03/2018 10:00:00	482.034	18.38	56.33	0.389	14.29	48.48	998.686
204	09/03/2018 11:00:00	593.535	20.01	54.43	1.246	323	37.64	998.771
205	09/03/2018 12:00:00	868.725	21.44	47.08	2.425	357.8	39.83	997.987
206	09/03/2018 13:00:00	877.383	22.62	43.11	2.872	347.3	41.67	997.56
207	09/03/2018 14:00:00	854.639	23.41	39.41	2.542	304.9	37.18	997.031
208	09/03/2018 15:00:00	765.425	23.72	50.64	3.318	267.9	51.83	996.418
209	09/03/2018 16:00:00	475.38	20.42	51.92	4.482	217.5	32.31	996.239
210	09/03/2018 17:00:00	231.419	19.67	53.67	3.053	234.2	34.54	995.841
211	09/03/2018 18:00:00	110.371	18.87	55.76	3.038	221.5	34.74	995.568
212	09/03/2018 19:00:00	41.8932	18.23	62.32	2.257	235.4	36.42	995.457
213	09/03/2018 20:00:00	0.762004	17.12	69.79	2.056	238.8	36.57	995.403
214	09/03/2018 21:00:00	0	16.56	71.31	0.586	225.2	33.49	995.47
215	09/03/2018 22:00:00	0	16.38	73.79	0.487	259.1	49.34	995.519
216	09/03/2018 23:00:00	0	16.31	75.34	0.06	206.4	7.137	995.259
217	10/03/2018 00:00:00	0	16.04	74.74	0.264	146.2	44.66	995.199
218	10/03/2018 01:00:00	0	15.86	74.61	0.434	95.6	13.03	994.834
219	10/03/2018 02:00:00	0	15.76	74.22	1.225	83.9	27.49	994.083
220	10/03/2018 03:00:00	0	16.28	72.52	0.062	318.1	9.42	993.713
221	10/03/2018 04:00:00	0	16.7	69.76	0.073	301.6	6.447	993.512
222	10/03/2018 05:00:00	0	16.28	71.22	0.239	6.568	15.51	993.274
223	10/03/2018 06:00:00	0	16.2	74.26	0.077	47.6	7.093	993.719
224	10/03/2018 07:00:00	3.4682	15.48	72.73	1.39	62.44	22.95	993.845
225	10/03/2018 08:00:00	82.8312	16.26	65.48	0.365	24.7	23.55	994.409
226	10/03/2018 09:00:00	183.171	18.46	56.72	1.025	321.6	19.11	994.825
227	10/03/2018 10:00:00	177.326	20.02	47.09	1.242	354.3	29.62	995.036
228	10/03/2018 11:00:00	259.33	20.81	45	1.824	324.1	23.56	995.194
229	10/03/2018 12:00:00	612.269	22.75	35.97	1.61	309.9	34.41	994.755
230	10/03/2018 13:00:00	373.505	22.91	41.94	3.107	315.1	27.62	994.589
231	10/03/2018 14:00:00	244.946	21.29	55.17	3.047	312.8	23.37	994.894
232	10/03/2018 15:00:00	251.617	20.74	55.74	1.72	299.4	28.6	994.925
233	10/03/2018 16:00:00	203.548	20.27	67.09	1.664	236.3	40.04	994.827
234	10/03/2018 17:00:00	210.752	19.87	64.64	1.058	142.9	71.46	994.831
235	10/03/2018 18:00:00	198.008	20.68	59.84	0.74	4.965	25.1	994.847
236	10/03/2018 19:00:00	59.9035	19.99	69.3	2.222	332.1	24.17	994.929
237	10/03/2018 20:00:00	0.897029	19.12	71.29	0.754	302.6	23.52	995.213
238	10/03/2018 21:00:00	0	18.85	74.8	0.639	270.1	49.42	995.589
239	10/03/2018 22:00:00	0	18.56	75.47	0.058	220.1	8.07	995.872
240	10/03/2018 23:00:00	0	18.5	75.39	0.014	198.2	1.987	995.538
241	11/03/2018 00:00:00	0	18.19	77.29	0.833	205.7	13.34	995.484
242	11/03/2018 01:00:00	0	17.96	76.88	0.086	225.5	9.11	995.752
243	11/03/2018 02:00:00	0	17.69	78.39	0.315	237.4	16.43	995.832
244	11/03/2018 03:00:00	0	17.62	78.98	0	0	0	995.831
245	11/03/2018 04:00:00	0	17.55	76.9	0.458	223.8	21.42	995.782
246	11/03/2018 05:00:00	0	16.86	80.9	0.438	218	15.14	996.188
247	11/03/2018 06:00:00	0	16.18	84.8	0.361	51.8	14.91	996.558
248	11/03/2018 07:00:00	4.28788	16.21	83.8	0.751	337.1	21.86	996.907
249	11/03/2018 08:00:00	105.673	18.32	67.25	1.692	29.84	31.52	997.33
250	11/03/2018 09:00:00	323.277	20.53	58.69	2.611	63.91	27.82	997.39
251	11/03/2018 10:00:00	416.002	21.86	58.09	3.026	5.982	50.49	997.798
252	11/03/2018 11:00:00	702.529	22.87	46.92	3.13	336.6	32.92	998.448
253	11/03/2018 12:00:00	677	23.86	40.28	2.906	327.9	30.99	998.508
254	11/03/2018 13:00:00	813.638	25.53	38.01	2.01	335.8	44.75	998.288
255	11/03/2018 14:00:00	867.391	26.61	37.62	2.067	321.3	48.89	997.878
256	11/03/2018 15:00:00	921.37	27.25	46.69	2.095	288.4	65.47	997.723
257	11/03/2018 16:00:00	185.358	24.3	59.22	3.084	204.3	39.05	998.188
258	11/03/2018 17:00:00	111.419	23.79	64.17	2.58	221.4	32.23	998.71
259	11/03/2018 18:00:00	262.024	23.39	67.57	3.054	224	33.35	999.3
260	11/03/2018 19:00:00	85.3452	21.92	73.15	2.413	227.3	31.63	999.962
261	11/03/2018 20:00:00	0.482649	19.51	81.8	1.637	248.9	30.79	1000.4
262	11/03/2018 21:00:00	0	17.86	89.3	1.089	261.3	25.01	1001.35
263	11/03/2018 22:00:00	0	17.28	92.9	0.933	238.6	28.82	1001.94
264	11/03/2018 23:00:00	0	16.54	95.8	1.082	232.2	69.06	1001.64
265	12/03/2018 00:00:00	0	16.43	96.4	0.401	336.3	16.32	1001.62
266	12/03/2018 01:00:00	0	16.32	96.4	0.204	63.49	10.11	1001.62
267	12/03/2018 02:00:00	0	15.62	95.9	0.655	81.3	11.5	1001.48
268	12/03/2018 03:00:00	0	15.34	95	0.809	72.2	19.54	1001.44
269	12/03/2018 04:00:00	0	15.12	94.9	0.139	53.45	8.09	1001.12
270	12/03/2018 05:00:00	0	14.77	94.8	0.165	47.27	12.31	1001.09
271	12/03/2018 06:00:00	0	14.59	94.9	0.239	68.86	16.66	1001.25
272	12/03/2018 07:00:00	2.78639	14.41	95.1	0.256	61.37	14.4	1001.31
273	12/03/2018 08:00:00	112.997	15.97	89.7	0.345	13.57	26.04	1001.51
274	12/03/2018 09:00:00	323.151	20.84	67.2	0.27	330	11.15	1001.51
275	12/03/2018 10:00:00	536.152	23.93	49.94	0.827	306	25.89	1001.6
276	12/03/2018 11:00:00	706.834	26.25	49.8	1.289	237.2	35.27	1001.53
277	12/03/2018 12:00:00	812.555	27.43	44.32	1.903	214.4	46.72	1001.17
278	12/03/2018 13:00:00	871.566	28.7	42.64	2.499	231.8	43.5	1000.33
279	12/03/2018 14:00:00	873.433	28.98	42.03	2.861	230.7	37.63	999.679
280	12/03/2018 15:00:00	809.207	29.2	42.41	3.225	244.2	35.81	999.019
281	12/03/2018 16:00:00	681.176	28.74	44.5	3.94	227.4	35.96	998.398
282	12/03/2018 17:00:00	493.574	28.23	43.64	4.081	224.3	36.16	997.958
283	12/03/2018 18:00:00	281.426	28.03	47.91	2.976	247.4	34.37	998.16
284	12/03/2018 19:00:00	78.6314	26.2	59.92	2.231	246.9	32.57	998.147
285	12/03/2018 20:00:00	0.334773	23.35	67.23	0.806	219.3	26.41	998.201
286	12/03/2018 21:00:00	0	22.23	72.13	0.216	206.5	7.958	998.572
287	12/03/2018 22:00:00	0	20.98	75.28	0.048	256.3	3.73	998.79
288	12/03/2018 23:00:00	0	20.13	74.46	0.599	68.45	13.14	998.715
289	13/03/2018 00:00:00	0	19.24	77.18	0.214	37.87	14.61	998.516
290	13/03/2018 01:00:00	0	19.07	76.75	0.103	357	8.24	998.188
291	13/03/2018 02:00:00	0	18.24	79.92	0.322	26.92	19.78	997.527
292	13/03/2018 03:00:00	0	18.09	79.3	0.999	358	22.95	997.138
293	13/03/2018 04:00:00	0	17.43	81.2	0.251	74.08	7.673	997.469
294	13/03/2018 05:00:00	0	16.88	83.3	0.456	43.77	28.15	997.785
295	13/03/2018 06:00:00	0	17.34	83.1	2.842	348.3	33.91	998.117
296	13/03/2018 07:00:00	2.34436	17.46	86.1	2.533	326.7	18.17	999.021
297	13/03/2018 08:00:00	109.281	17.11	90.4	3.61	336.3	24.7	999.954
298	13/03/2018 09:00:00	258.189	19.42	85	2.146	2.389	32.63	1000.05
299	13/03/2018 10:00:00	192.906	19.36	81.2	2.625	347	27.07	1000.4
300	13/03/2018 11:00:00	268.26	20.26	74.61	2.045	0.379	31.79	1000.62
301	13/03/2018 12:00:00	376.237	21.69	69.36	1.942	5.791	33.65	1000.21
302	13/03/2018 13:00:00	390.139	22.66	66.49	1.96	344.4	46.64	999.537
303	13/03/2018 14:00:00	523.333	23.58	64.57	2.326	290.1	29.6	999.298
304	13/03/2018 15:00:00	583.783	24.23	59.47	2.127	281.8	35.53	998.599
305	13/03/2018 16:00:00	353.792	23.46	61.97	2.265	282	30.04	997.898
306	13/03/2018 17:00:00	390.921	24.26	59.47	1.603	293	34.5	997.845
307	13/03/2018 18:00:00	128.308	22.93	70.39	2.291	223.7	33.72	997.674
308	13/03/2018 19:00:00	55.7149	21.62	77.35	2.82	212.9	31.07	998.111
309	13/03/2018 20:00:00	0.126048	20.04	80.2	2.522	207	23.9	998.307
310	13/03/2018 21:00:00	0	19.66	81.6	2.099	211.3	26.92	998.977
311	13/03/2018 22:00:00	0	19.5	79.65	0.941	208	22.53	999.22
312	13/03/2018 23:00:00	0	19.55	79.02	0.273	312.3	12.53	998.994
313	14/03/2018 00:00:00	0	19.49	81.1	0.512	330.7	9.8	998.687
314	14/03/2018 01:00:00	0	18.39	88.5	1.845	327.5	18.56	998.752
315	14/03/2018 02:00:00	0	17.61	91.3	1.474	326.9	18.63	998.544
316	14/03/2018 03:00:00	0	17.25	90	0.558	349.5	26.54	998.413
317	14/03/2018 04:00:00	0	17.14	92.6	0.731	338	17.38	998.178
318	14/03/2018 05:00:00	0	17.18	93.1	1.28	349.9	18.01	997.75
319	14/03/2018 06:00:00	0	17.47	91.6	0.804	25.04	27.08	997.902
320	14/03/2018 07:00:00	2.18618	17.79	88.5	0.641	47.68	17.23	998.075
321	14/03/2018 08:00:00	57.4153	18.28	79.49	1.152	31.58	20.58	998.541
322	14/03/2018 09:00:00	172.971	19.72	69.81	1.628	356.9	29.69	998.756
323	14/03/2018 10:00:00	201.895	20.5	68.02	2.505	11.44	33.24	998.802
324	14/03/2018 11:00:00	192.65	21	63.96	2.223	346.5	33.91	999.007
325	14/03/2018 12:00:00	471.194	22.37	59.64	3.312	347.5	35.46	998.721
326	14/03/2018 13:00:00	300.829	22.91	61.89	2.986	346.1	32.73	998.174
327	14/03/2018 14:00:00	160.745	22.35	66.99	2.782	322.6	27.3	997.831
328	14/03/2018 15:00:00	298.29	23.13	63.78	3.027	296.3	28.59	997.271
329	14/03/2018 16:00:00	419.465	23.89	64.45	2.898	292.9	26.43	996.632
330	14/03/2018 17:00:00	285.017	23.23	69.14	2.546	289	28.66	996.449
331	14/03/2018 18:00:00	57.5927	22.07	74.16	2.372	290.7	30.71	996.735
332	14/03/2018 19:00:00	10.7922	21.26	84.3	1.841	302.4	26.99	996.891
333	14/03/2018 20:00:00	0.285418	19.2	94.3	1.082	303.4	31.77	997.303
334	14/03/2018 21:00:00	0	19.02	96.6	1.051	295.6	35.22	997.8
335	14/03/2018 22:00:00	0	18.6	97.7	1.507	231.5	30.63	998.432
336	14/03/2018 23:00:00	0	18.1	98.4	2.083	234.4	35.24	998.474
337	15/03/2018 00:00:00	0	16.96	98.4	2.845	219.8	31.81	998.594
338	15/03/2018 01:00:00	0	16.62	97.6	3.421	225.6	31.01	998.365
339	15/03/2018 02:00:00	0	15.97	95.6	3.846	223	30.88	998.444
340	15/03/2018 03:00:00	0	15.87	95.8	2.988	229.4	33.23	998.474
341	15/03/2018 04:00:00	0	15.68	84.6	3.666	206.4	35.24	998.039
342	15/03/2018 05:00:00	0.000207053	16.19	82.8	2.044	228.1	37.55	998.082
343	15/03/2018 06:00:00	0	16.09	78.05	3.173	221.4	30.69	998.35
344	15/03/2018 07:00:00	0.923865	16.02	76.71	4.269	213.1	23.94	999.034
345	15/03/2018 08:00:00	35.755	15.98	72.59	3.747	208.9	23.14	999.973
346	15/03/2018 09:00:00	187.227	16.74	67.42	3.524	202.1	30.1	1000.44
347	15/03/2018 10:00:00	256.98	17.62	64.39	2.978	207.3	30.62	1000.73
348	15/03/2018 11:00:00	279.664	17.48	67.68	4.186	204.4	26.87	1001.32
349	15/03/2018 12:00:00	226.258	16.74	64.37	4.563	207.8	28.79	1001.49
350	15/03/2018 13:00:00	366.002	17.51	57.17	4.024	207	30.16	1001.52
351	15/03/2018 14:00:00	510.781	17.97	60.86	4.264	204	30.38	1001.62
352	15/03/2018 15:00:00	445.411	18.22	58.04	3.689	198.2	34	1001.44
353	15/03/2018 16:00:00	570.237	19.04	53.4	3.028	184.9	39.87	1001.28
354	15/03/2018 17:00:00	478.073	19.05	52.35	3.464	157.9	33.44	1001.16
355	15/03/2018 18:00:00	269.931	18.65	54.65	3.305	164.5	34.33	1001.51
356	15/03/2018 19:00:00	72.0229	17.14	59.25	2.577	187.6	36	1002.23
357	15/03/2018 20:00:00	0.124842	15.84	60.89	2.619	203.1	28.29	1002.71
358	15/03/2018 21:00:00	0	15.46	58.27	1.715	180.4	44.54	1003.37
359	15/03/2018 22:00:00	0	15.56	58.45	3.299	153.2	40.15	1003.77
360	15/03/2018 23:00:00	0	15.28	57.25	4.465	131.5	32.73	1003.56
361	16/03/2018 00:00:00	0	15.15	56.33	4.449	126.5	31.1	1003.35
362	16/03/2018 01:00:00	0	15.14	50.07	4.62	132.9	33.55	1003.59
363	16/03/2018 02:00:00	0	15.23	51.97	4.565	131.6	32.41	1003.53
364	16/03/2018 03:00:00	0	15.12	53.91	4.331	146	37.98	1003.43
365	16/03/2018 04:00:00	0	15.32	55.12	5.103	138.8	35.75	1003.24
366	16/03/2018 05:00:00	0	15.31	57.96	5.307	131.5	33.4	1003.09
367	16/03/2018 06:00:00	0	15.55	53.31	5.03	135.3	33.85	1003.25
368	16/03/2018 07:00:00	1.80273	15.43	57.3	4.156	145	39.17	1003.96
369	16/03/2018 08:00:00	109.605	16.37	56.28	4.726	125.7	31.39	1004.4
370	16/03/2018 09:00:00	338.387	17.42	52.04	4.886	130	33.52	1004.88
371	16/03/2018 10:00:00	555.577	18.42	48.37	5.166	137.3	33.13	1005.4
372	16/03/2018 11:00:00	735.466	19.69	45.44	4.983	135.8	32.11	1005.43
373	16/03/2018 12:00:00	859.828	20.8	43.27	4.657	131.5	33.13	1005.06
374	16/03/2018 13:00:00	918.761	21.61	43	5.35	134.8	32.22	1004.53
375	16/03/2018 14:00:00	909.232	22.53	41.9	4.962	141.3	33.33	1003.88
376	16/03/2018 15:00:00	831.028	22.88	43.05	5.117	138.2	31.56	1003.33
377	16/03/2018 16:00:00	692.008	23.19	40.76	5.076	136.8	33.29	1002.95
378	16/03/2018 17:00:00	504.035	22.76	44.45	5.497	133.4	30.56	1002.85
379	16/03/2018 18:00:00	284.207	21.67	51.37	5.703	136.1	31.49	1002.88
380	16/03/2018 19:00:00	75.2062	20.04	57.69	6.636	127.2	29.83	1003.32
381	16/03/2018 20:00:00	0.226017	18.59	62.46	7.354	122.1	30.44	1003.32
382	16/03/2018 21:00:00	0	18.02	62.91	6.948	120.1	28.39	1003.75
383	16/03/2018 22:00:00	0	17.95	61.54	6.674	120.9	27.75	1004.12
384	16/03/2018 23:00:00	0	18.18	60.73	6.177	115	28.77	1003.78
385	17/03/2018 00:00:00	0	18.29	58.74	4.787	111	26.62	1003.53
386	17/03/2018 01:00:00	0	18.48	54.96	3.878	118.1	27.79	1003.24
387	17/03/2018 02:00:00	0	18.58	56.6	4.472	108.8	25	1002.71
388	17/03/2018 03:00:00	0	18.54	56.98	4.537	105.4	25.11	1002.28
389	17/03/2018 04:00:00	0	18.65	55.22	4.424	114.3	28.11	1001.91
390	17/03/2018 05:00:00	0	18.59	56.26	3.862	120.7	27.57	1001.59
391	17/03/2018 06:00:00	0	18.51	54.4	3.758	120.5	30.79	1001.24
392	17/03/2018 07:00:00	1.39423	18.45	54.2	3.729	119.7	29.73	1000.97
393	17/03/2018 08:00:00	106.585	18.87	50	3.376	120.3	26.75	1001.33
394	17/03/2018 09:00:00	334.364	20.36	45.97	3.234	130.4	31.46	1001.45
395	17/03/2018 10:00:00	547.38	22.29	38.88	3.072	139.2	31.85	1001.59
396	17/03/2018 11:00:00	715.243	23.36	35.4	2.339	192.2	39.74	1001.55
397	17/03/2018 12:00:00	846.543	25.33	31.76	2.159	139.5	37.45	1000.82
398	17/03/2018 13:00:00	905.472	26.42	24.85	1.542	126.1	37.07	1000.19
399	17/03/2018 14:00:00	886.852	27.62	24.67	1.495	285.7	78.39	999.449
400	17/03/2018 15:00:00	814.157	27.49	27.28	2.608	255.6	50.58	998.532
401	17/03/2018 16:00:00	677.192	27.5	30.19	3.744	251.9	36.01	997.653
402	17/03/2018 17:00:00	488.621	26.87	33.29	3.494	241.1	35.53	997.176
403	17/03/2018 18:00:00	272.604	26.15	34.36	2.914	248.9	31.58	996.697
404	17/03/2018 19:00:00	65.652	25.43	39.38	1.249	256	59.53	996.238
405	17/03/2018 20:00:00	0	23.7	45.51	2.923	143.1	34.16	996.459
406	17/03/2018 21:00:00	0	22.31	50.41	3.82	122.9	33.13	996.894
407	17/03/2018 22:00:00	0	21.75	51.05	4.43	116.8	29.3	996.996
408	17/03/2018 23:00:00	0	21.26	52.78	3.876	111.5	29.48	996.58
409	18/03/2018 00:00:00	0	19.77	60.62	0.686	168.2	34.79	996.844
410	18/03/2018 01:00:00	0	17.19	65.14	0.481	58.52	18.72	996.514
411	18/03/2018 02:00:00	0	16.49	70.83	0.146	348	35.5	995.845
412	18/03/2018 03:00:00	0	15.21	75.82	0.042	321.4	10.96	995.707
413	18/03/2018 04:00:00	0	14.04	78.86	0.435	21.37	19.43	995.086
414	18/03/2018 05:00:00	0	13.89	77.32	0.21	336.6	20.69	994.525
415	18/03/2018 06:00:00	0	13.66	80.5	0.027	359.7	3.666	994.561
416	18/03/2018 07:00:00	1.22897	12.66	81.5	0	0	0	994.753
417	18/03/2018 08:00:00	102.012	13.96	70.51	0	0	0	994.855
418	18/03/2018 09:00:00	324.94	18.59	53.54	0.001	195.6	0.272	995.215
419	18/03/2018 10:00:00	536.465	21.98	44.46	0.43	245.3	18.85	995.345
420	18/03/2018 11:00:00	713.518	24.01	43.06	1.831	243.9	33.2	995.456
421	18/03/2018 12:00:00	829.544	25.48	37.9	2.234	247.1	37.15	995.048
422	18/03/2018 13:00:00	888.19	26.28	38.61	3.074	234.6	32.66	994.932
423	18/03/2018 14:00:00	886.372	26.67	37.31	3.153	244.5	33.94	994.444
424	18/03/2018 15:00:00	800.461	26.4	40.44	3.69	244.2	32.67	993.799
425	18/03/2018 16:00:00	661.932	25.74	44.79	3.728	254.1	31.18	993.638
426	18/03/2018 17:00:00	478.178	25.5	62.92	3.83	259.8	29.53	993.45
427	18/03/2018 18:00:00	259.221	23.36	63.77	3.349	255.9	28.12	993.6
428	18/03/2018 19:00:00	61.4475	21.57	71.96	3.296	251.5	30.89	993.985
429	18/03/2018 20:00:00	0.00931379	19.97	76.04	1.056	242.6	35.8	994.308
430	18/03/2018 21:00:00	0	19.41	77.03	0.711	233.5	28.88	994.62
431	18/03/2018 22:00:00	0	18.62	80.9	0.533	296	62.36	995.206
432	18/03/2018 23:00:00	0	18.13	83.8	0.562	225.8	31.73	995.625
433	19/03/2018 00:00:00	0	17.56	85.2	1.167	193.6	53.79	995.889
434	19/03/2018 01:00:00	0	17.9	82.5	1.995	226.2	35.63	996.207
435	19/03/2018 02:00:00	0	17.84	82.7	2.549	237.5	31.64	996.426
436	19/03/2018 03:00:00	0	17.45	85.3	1.848	236.4	31.41	996.771
437	19/03/2018 04:00:00	0	16.37	87.4	0.655	201.6	64.02	996.8
438	19/03/2018 05:00:00	0	14.92	91	0.389	84	9.9	996.989
439	19/03/2018 06:00:00	0	14.19	92.3	0.339	78.9	15.61	997.034
440	19/03/2018 07:00:00	1.19149	13.38	93.9	0.836	72.86	19.44	997.308
441	19/03/2018 08:00:00	99.2128	14.33	87.6	1.043	80	23.66	997.626
442	19/03/2018 09:00:00	321.173	18.63	66.81	0.322	75.65	26.08	997.902
443	19/03/2018 10:00:00	529.758	20.74	62.42	1.46	231.7	37.82	998.177
444	19/03/2018 11:00:00	709.176	21.14	58.45	3.356	233.4	33.58	998.328
445	19/03/2018 12:00:00	835.384	21.76	57.05	3.705	223.2	35.31	998.066
446	19/03/2018 13:00:00	893.331	21.89	58.21	4.116	233.2	36.04	997.528
447	19/03/2018 14:00:00	883.483	21.48	56.24	4.462	232.7	34.58	997.275
448	19/03/2018 15:00:00	804.851	21.45	59.37	4.166	224.6	37.16	997.022
449	19/03/2018 16:00:00	667.454	20.52	61.04	5.045	217.8	30.74	996.676
450	19/03/2018 17:00:00	478.417	20.32	57.73	4.514	232.4	34.51	996.257
451	19/03/2018 18:00:00	262.551	20.34	60.72	3.167	246.4	34.37	996.469
452	19/03/2018 19:00:00	60.6292	18.59	67.45	3.071	237.3	33.93	997.159
453	19/03/2018 20:00:00	0.000206977	16.97	72.17	2.15	235.6	34.67	997.309
454	19/03/2018 21:00:00	0	16.28	74.7	0.937	259.8	31.74	997.318
455	19/03/2018 22:00:00	0	15.51	76.6	0.581	242.1	31.87	997.203
456	19/03/2018 23:00:00	0	14.68	80.4	0.885	112.8	54.79	996.975
457	20/03/2018 00:00:00	0	13.56	82.8	0.57	72.97	18.1	996.745
458	20/03/2018 01:00:00	0	12.84	85.6	0.753	68.26	18.23	996.629
459	20/03/2018 02:00:00	0	12.07	87.6	0.834	65.62	20.04	996.519
460	20/03/2018 03:00:00	0	11.51	89.5	0.308	51.52	10.25	996.209
461	20/03/2018 04:00:00	0	11.04	92	0	0	0	995.989
462	20/03/2018 05:00:00	0	10.91	91.5	0.99	72.31	22.44	996.224
463	20/03/2018 06:00:00	0	10.8	92	0.413	39.32	17.86	996.106
464	20/03/2018 07:00:00	1.15486	10.37	92.3	0.457	57.19	18.86	996.233
465	20/03/2018 08:00:00	100.183	11.56	85.9	0.773	77.66	14.76	996.565
466	20/03/2018 09:00:00	305.547	16.48	68.8	0.051	95.5	11.1	996.568
467	20/03/2018 10:00:00	523.105	17.92	67.02	1.509	222.4	27.01	996.716
468	20/03/2018 11:00:00	704.432	19.14	60.09	2.068	232.5	35.99	996.62
469	20/03/2018 12:00:00	827.013	19.87	58.38	2.558	236.8	35.88	996.499
470	20/03/2018 13:00:00	887.835	20.14	55.67	2.95	237.3	36.29	996.513
471	20/03/2018 14:00:00	881.741	20.81	53.05	2.972	226.8	35.58	996.144
472	20/03/2018 15:00:00	805.843	21.19	55.1	2.92	231.5	36.86	995.794
473	20/03/2018 16:00:00	666.729	21.15	54.72	3.348	229.8	33.8	995.742
474	20/03/2018 17:00:00	471.544	20.81	57.28	3.313	230.8	33.81	995.947
475	20/03/2018 18:00:00	249.064	19.99	61.94	3.261	224.9	35.17	996.284
476	20/03/2018 19:00:00	42.2914	18.37	68.95	2.721	238.1	33.77	996.838
477	20/03/2018 20:00:00	0	17.1	73.23	1.407	238.1	32.06	997.382
478	20/03/2018 21:00:00	0	16.75	73.78	0.482	204.7	29.13	998.049
479	20/03/2018 22:00:00	0	16.65	73.44	0.876	73.17	29.18	998.355
480	20/03/2018 23:00:00	0	16.5	74.36	0.74	91.6	64.2	998.596
481	21/03/2018 00:00:00	0	16.84	73.21	0.332	206.9	46.25	999.048
482	21/03/2018 01:00:00	0	16.14	91.4	0.737	252.3	26.54	999.473
483	21/03/2018 02:00:00	0	15.65	95.3	1.205	244.1	29.28	999.753
484	21/03/2018 03:00:00	0	15.56	97.4	1.158	251.7	22.64	999.956
485	21/03/2018 04:00:00	0	15.52	98.3	1.265	246.7	25.7	1000.14
486	21/03/2018 05:00:00	0	15.43	98.4	1.417	220.4	31.46	1000.18
487	21/03/2018 06:00:00	0	15	98.4	0.65	190.5	37.35	1000.48
488	21/03/2018 07:00:00	1.0621	14.59	95.8	1.103	175.6	42.56	1001.1
489	21/03/2018 08:00:00	85.1964	14.93	92.1	0.399	117	43.07	1001.79
490	21/03/2018 09:00:00	306.059	18.1	62.19	1.15	166.1	38.18	1002.13
491	21/03/2018 10:00:00	524.352	19.78	57.46	3.476	140.3	34.25	1002.45
492	21/03/2018 11:00:00	700.888	20.69	54.9	4.144	137.9	33.17	1002.7
493	21/03/2018 12:00:00	822.913	21.76	49.56	4.21	135	31	1002.61
494	21/03/2018 13:00:00	880.499	22.76	45.45	4.262	132.9	31.69	1002.13
495	21/03/2018 14:00:00	869.702	23.78	42.63	4.38	138.7	34.46	1001.72
496	21/03/2018 15:00:00	792.564	24.33	44.28	5.07	145.5	32.05	1001.49
497	21/03/2018 16:00:00	654.578	23.98	47.9	5.565	132.9	32.91	1001.37
498	21/03/2018 17:00:00	468.344	23.39	47.65	6.477	131.9	31.16	1001.36
499	21/03/2018 18:00:00	248.327	22.48	54.98	6.536	128	29.17	1001.56
500	21/03/2018 19:00:00	52.1868	20.92	59.84	6.402	121	30.21	1001.86
501	21/03/2018 20:00:00	0.000413949	19.67	61.34	6.67	119.4	29.05	1002.18
502	21/03/2018 21:00:00	0	19.12	61.69	6.986	118.4	28.08	1002.96
503	21/03/2018 22:00:00	0	18.66	63.4	7.25	122.1	28.7	1003.56
504	21/03/2018 23:00:00	0	18.5	62.32	6.742	121.2	29.08	1003.58
505	22/03/2018 00:00:00	0	18.61	61.53	6.443	115.2	26.57	1003.46
506	22/03/2018 01:00:00	0	18.86	62.18	6.081	116.5	28.17	1003.48
507	22/03/2018 02:00:00	0	19.06	57.22	5.905	122	30.64	1003.24
508	22/03/2018 03:00:00	0	19.36	59.79	5.352	132.8	31.52	1002.87
509	22/03/2018 04:00:00	0	19	58.53	5.115	126.3	32.6	1002.63
510	22/03/2018 05:00:00	0	18.79	61.14	6.069	118.8	27.44	1002.46
511	22/03/2018 06:00:00	0	18.63	60.58	5.413	129.8	29.55	1002.58
512	22/03/2018 07:00:00	1.02321	18.71	60.98	5.587	120.7	28.8	1002.55
513	22/03/2018 08:00:00	90.0086	18.94	55.76	5.656	130.8	30.21	1002.76
514	22/03/2018 09:00:00	311.541	20.32	50.79	5.297	130.3	28.52	1002.97
515	22/03/2018 10:00:00	527.017	21.94	46.59	4.856	136.8	31.65	1003.27
516	22/03/2018 11:00:00	700.382	23.69	41.4	4.222	147.3	32.46	1003.32
517	22/03/2018 12:00:00	821.697	25.07	37.07	4.167	138.3	33.22	1002.98
518	22/03/2018 13:00:00	881.112	26.24	34.43	4.207	131.3	32.2	1002.28
519	22/03/2018 14:00:00	871.985	27.44	30.88	3.824	129.4	31.1	1001.48
520	22/03/2018 15:00:00	793.524	28.35	28.97	3.359	126.1	30.57	1000.63
521	22/03/2018 16:00:00	653.935	28.79	30.73	3.478	120.6	31.91	999.906
522	22/03/2018 17:00:00	465.471	28.81	30.39	3.58	128.4	29.37	999.212
523	22/03/2018 18:00:00	243.787	27.98	34.33	3.971	118	28.26	998.787
524	22/03/2018 19:00:00	49.3222	26.19	37.77	4.436	106.4	28.74	998.467
525	22/03/2018 20:00:00	0	24.11	42.07	4.627	105.6	27.19	998.575
526	22/03/2018 21:00:00	0	22.7	44.03	3.362	111.9	26.12	998.654
527	22/03/2018 22:00:00	0	21.52	54.02	0.642	135.9	35.87	998.78
528	22/03/2018 23:00:00	0	20.06	60.56	0.464	104.3	20.7	998.518
529	23/03/2018 00:00:00	0	17.2	70.12	0.362	322.2	33.44	998.042
530	23/03/2018 01:00:00	0	16.11	74.03	0.436	322.6	19.53	997.743
531	23/03/2018 02:00:00	0	14.94	75.91	0.359	7.44	12.61	997.144
532	23/03/2018 03:00:00	0	14.23	77.41	0.028	11.94	4.366	996.423
533	23/03/2018 04:00:00	0	13.15	79.83	0.2	34.78	5.18	995.766
534	23/03/2018 05:00:00	0	13.02	79.21	0.155	334.7	7.175	995.009
535	23/03/2018 06:00:00	0	12.77	78.51	0.393	55.9	14.46	994.675
536	23/03/2018 07:00:00	0.823761	12.74	76.44	0.385	55.86	19.45	994.548
537	23/03/2018 08:00:00	88.3536	14.15	66.63	0.469	38.86	21.76	994.454
538	23/03/2018 09:00:00	301.9	20.48	43.67	0.021	30.53	1.652	994.215
539	23/03/2018 10:00:00	506.042	23.14	43.92	0.973	248.5	24.71	994.11
540	23/03/2018 11:00:00	674.16	25.2	35.3	1.554	231.5	31.97	994.179
541	23/03/2018 12:00:00	790.139	27.29	32.72	1.266	206.8	35.91	993.682
542	23/03/2018 13:00:00	841.249	30.1	24.94	1.562	330.9	41.65	992.911
543	23/03/2018 14:00:00	825.138	29.46	37.43	3.439	258.9	48.16	992.275
544	23/03/2018 15:00:00	755.949	27.1	33.24	3.685	218	30.93	992.051
545	23/03/2018 16:00:00	620.503	25.15	50.96	3.813	235.4	33.08	992.148
546	23/03/2018 17:00:00	441.242	21.88	70.38	4.547	222.2	28.69	992.333
547	23/03/2018 18:00:00	229.405	20.61	76.42	4.332	221.7	34.41	992.36
548	23/03/2018 19:00:00	40.7175	19.33	80.1	3.254	234.8	34.94	992.394
549	23/03/2018 20:00:00	0	18.17	82.5	2.295	238.2	32.74	992.517
550	23/03/2018 21:00:00	0	17.57	85.1	1.63	217.7	31.06	992.545
551	23/03/2018 22:00:00	0	17.09	85.7	1.343	232.2	31.34	992.435
552	23/03/2018 23:00:00	0	16.52	87.2	0.572	186.6	64.95	992.166
553	24/03/2018 00:00:00	0	15.81	88.7	0.203	88.9	20.23	992.043
554	24/03/2018 01:00:00	0	15.37	89.5	0.851	111.9	25.78	992.343
555	24/03/2018 02:00:00	0	14.66	90.4	0.625	84.2	32.47	992.789
556	24/03/2018 03:00:00	0	14.11	91.5	0.44	69.32	19.7	992.971
557	24/03/2018 04:00:00	0	13.85	91.7	0.188	73.1	6.765	993.01
558	24/03/2018 05:00:00	0	14.51	89.6	0.945	90.7	16.67	993.325
559	24/03/2018 06:00:00	0	14.84	89.3	0.461	57.03	35.45	993.534
560	24/03/2018 07:00:00	0.433594	15.42	86.9	0.054	312.7	5.649	994.104
561	24/03/2018 08:00:00	18.3288	15.89	84.8	0.889	21.13	30.68	994.337
562	24/03/2018 09:00:00	104.888	16.64	80	1.459	343.1	26.15	994.75
563	24/03/2018 10:00:00	134.534	17.44	77.22	0.953	5.161	35.21	995.001
564	24/03/2018 11:00:00	229.212	18.42	73.3	1.42	347.3	30.42	995.005
565	24/03/2018 12:00:00	612.267	19.99	64.34	2.216	329.8	31.38	995.09
566	24/03/2018 13:00:00	182.009	19.97	65.01	2.945	316.7	27.6	994.89
567	24/03/2018 14:00:00	439.57	18.84	74	3.131	221.3	39.27	994.783
568	24/03/2018 15:00:00	355.298	19.01	73.79	2.527	234.1	34.65	994.611
569	24/03/2018 16:00:00	433.378	19.08	72.61	2.931	232	35.9	994.55
570	24/03/2018 17:00:00	247.534	18.6	73.01	3.148	229	36.87	994.787
571	24/03/2018 18:00:00	86.429	17.63	73.51	3.344	225.5	33.59	995.064
572	24/03/2018 19:00:00	9.62828	17.17	74.95	2.939	233.9	33.54	995.238
573	24/03/2018 20:00:00	0	16.86	73.55	3.493	219.9	30.88	995.713
574	24/03/2018 21:00:00	0	16.62	76.41	4.067	213.9	29.17	996.358
575	24/03/2018 22:00:00	0	14.69	88.6	3.518	218.6	32.75	997.244
576	24/03/2018 23:00:00	0	13.38	94.1	2.577	221.5	32.73	997.374
577	25/03/2018 00:00:00	0	12.9	96	1.733	247.7	27.93	997.512
578	25/03/2018 01:00:00	0	12.89	96.9	1.291	256.4	28.79	997.649
579	25/03/2018 02:00:00	0	12.95	97.3	0.984	259.4	25.72	998.031
580	25/03/2018 03:00:00	0	13.16	97.3	0.464	312.1	18.36	997.809
581	25/03/2018 04:00:00	0	13.47	96.9	0.087	295.7	13.76	997.726
582	25/03/2018 05:00:00	0	13.57	95.4	0.237	243.6	13.84	998.025
583	25/03/2018 06:00:00	0	13.73	94.1	0.82	253.6	29.26	998.646
584	25/03/2018 07:00:00	0.548544	13.83	92.5	0.242	62.22	10.93	999.264
585	25/03/2018 08:00:00	28.4916	13.59	90	0.455	80.3	18.33	999.965
586	25/03/2018 09:00:00	117.975	14.69	85	0.993	324.5	18.8	1000.39
587	25/03/2018 10:00:00	143.304	14.8	83.9	2.486	326.7	23.77	1000.78
588	25/03/2018 11:00:00	392.844	16.02	68.21	1.7	359.4	33.35	1000.86
589	25/03/2018 12:00:00	501.874	17.97	63.07	1.938	354.4	42.18	1000.66
590	25/03/2018 13:00:00	347.718	18.12	54.42	1.885	325.7	35.04	1000.51
591	25/03/2018 14:00:00	625.492	19.64	47.23	2.673	328.1	37.45	1000.13
592	25/03/2018 15:00:00	647.292	19.94	45.1	3.713	292.1	31.69	1000.05
593	25/03/2018 16:00:00	594.218	20.15	47.4	3.289	290	31.2	1000.31
594	25/03/2018 17:00:00	400.039	19.39	51.63	3.512	274.6	26.23	1000.88
595	25/03/2018 18:00:00	231.536	18.77	57.3	3.013	282.9	25.13	1001.25
596	25/03/2018 19:00:00	42.7931	17.54	66.04	2.393	284.8	22.55	1001.71
597	25/03/2018 20:00:00	0	16.47	69.95	1.015	290.9	34.09	1002.22
598	25/03/2018 21:00:00	0	15.98	74.12	0.765	44.22	18.73	1002.83
599	25/03/2018 22:00:00	0	16.05	76.05	0.618	43.86	21.33	1003.28
600	25/03/2018 23:00:00	0	15.6	79.45	0.489	64.86	10.94	1003.52
601	26/03/2018 00:00:00	0	14.77	83.1	0.605	34.03	31.17	1003.34
602	26/03/2018 01:00:00	0	14.06	85.7	1.166	61.06	21.22	1002.88
603	26/03/2018 02:00:00	0	13.5	85.5	0.462	75.81	19.45	1002.68
604	26/03/2018 03:00:00	0	12.65	88.2	0.939	77.29	16.06	1002.38
605	26/03/2018 04:00:00	0	11.73	90.3	0.731	53.72	19.72	1002.14
606	26/03/2018 05:00:00	0	11.17	92	0.738	56.72	17.38	1002.1
607	26/03/2018 06:00:00	0	10.85	92.4	0.826	51.4	20.7	1001.98
608	26/03/2018 07:00:00	0.889758	10.34	93.5	0.303	42.51	9	1002.24
609	26/03/2018 08:00:00	87.044	11.1	88.5	0.478	42.17	15.76	1002.38
610	26/03/2018 09:00:00	277.427	15.35	72.46	0.186	42.42	32.22	1002.5
611	26/03/2018 10:00:00	512.903	18.06	65.08	0.62	236.5	21.32	1002.59
612	26/03/2018 11:00:00	685.894	19.17	55.8	1.93	229.8	34.66	1002.25
613	26/03/2018 12:00:00	796.217	20.75	50.48	1.783	234.7	39.18	1001.64
614	26/03/2018 13:00:00	850.911	21.47	45.85	1.976	245.6	49.47	1001.31
615	26/03/2018 14:00:00	840.945	21.75	47.08	3.193	202.5	37.32	1000.82
616	26/03/2018 15:00:00	767.159	21.94	47.19	2.967	213.5	37.39	1000.26
617	26/03/2018 16:00:00	637.204	21.39	50.14	3.893	220.8	33.34	999.999
618	26/03/2018 17:00:00	453.42	20.39	55.34	4.143	223.8	32.79	999.698
619	26/03/2018 18:00:00	233.754	19.05	64.16	4.021	232.4	32.9	999.904
620	26/03/2018 19:00:00	40.7158	17.68	74.3	2.82	232.8	31.82	999.896
621	26/03/2018 20:00:00	0	16.39	76.07	1.58	235.5	32.19	999.947
622	26/03/2018 21:00:00	0	15.53	80	0.948	139.5	57.28	999.996
623	26/03/2018 22:00:00	0	14.03	83.4	1.357	77.24	13.68	999.783
624	26/03/2018 23:00:00	0	13.26	85.1	1.463	81.7	18.93	999.398
625	27/03/2018 00:00:00	0	12.29	88	1.159	71.3	20.44	998.611
626	27/03/2018 01:00:00	0	11.25	89.5	0.319	44.84	16.7	997.897
627	27/03/2018 02:00:00	0	10.37	89.7	0.617	58.22	17.9	997.053
628	27/03/2018 03:00:00	0	10.08	86.6	0.74	71.38	28.26	995.885
629	27/03/2018 04:00:00	0	9.61	85.1	0.85	61.31	23.09	995.195
630	27/03/2018 05:00:00	0	9.4	84.8	0.679	51.43	25.21	995.636
631	27/03/2018 06:00:00	0	9.24	84.1	1.092	54.61	24.04	996.011
632	27/03/2018 07:00:00	0.681816	9.97	86.5	1.478	45.73	30.99	995.657
633	27/03/2018 08:00:00	83.1167	11.68	72.58	0.504	57.21	17	995.511
634	27/03/2018 09:00:00	301.114	17.57	42.35	0.199	34.08	5.472	995.471
635	27/03/2018 10:00:00	508.215	22.63	30.91	0.027	232	10.94	994.871
636	27/03/2018 11:00:00	673.809	24.86	29.88	0.709	199.1	24.84	994.649
637	27/03/2018 12:00:00	786.616	26.65	27.15	1.391	222.9	31.79	994.377
638	27/03/2018 13:00:00	833.231	28.41	24.44	1.196	207.2	44	994.119
639	27/03/2018 14:00:00	816.425	29.23	26.34	2.387	233	40.79	993.971
640	27/03/2018 15:00:00	751.214	29.07	20.66	2.767	309.5	47.78	993.952
641	27/03/2018 16:00:00	631.683	27.72	22.24	4.191	325.1	28.41	994.328
642	27/03/2018 17:00:00	452.229	26.56	25.98	3.903	322.2	27.93	994.622
643	27/03/2018 18:00:00	207.795	24.64	39.32	3.145	325.6	25.32	995.356
644	27/03/2018 19:00:00	33.0308	21.02	57.93	2.643	334.5	21.44	996.075
645	27/03/2018 20:00:00	0	18.52	73.87	2.702	346	24.93	996.52
646	27/03/2018 21:00:00	0	17.11	84	2.132	356	33.35	996.931
647	27/03/2018 22:00:00	0	16.41	87.5	1.198	44.55	22.03	997.312
648	27/03/2018 23:00:00	0	16.5	87.6	1.324	22	34.19	997.663
649	28/03/2018 00:00:00	0	16.18	89.6	1.073	359.6	25.15	997.944
650	28/03/2018 01:00:00	0	15.61	88.4	1.092	14.09	22.82	997.985
651	28/03/2018 02:00:00	0	15.74	85.3	0.997	32.69	24.09	997.866
652	28/03/2018 03:00:00	0	15.86	83.1	1.212	36.12	21.07	997.348
653	28/03/2018 04:00:00	0	16	81.7	1.573	22.77	26.46	996.895
654	28/03/2018 05:00:00	0	15.77	82.3	1.792	25.99	24.41	996.643
655	28/03/2018 06:00:00	0	15.68	82.6	2.024	14.02	29.12	996.313
656	28/03/2018 07:00:00	0.307257	15.72	80.8	2.214	26.2	29.11	996.822
657	28/03/2018 08:00:00	61.6741	15.91	72.03	2.329	40.32	23.93	996.816
658	28/03/2018 09:00:00	285.713	17.37	65.74	2.045	33.38	35.16	997.071
659	28/03/2018 10:00:00	500.324	18.3	62.69	3.076	8.23	38.27	997.208
660	28/03/2018 11:00:00	666.98	19.4	57.84	3.31	354.6	38.33	997.221
661	28/03/2018 12:00:00	772.963	20.89	49.44	3.371	339.5	35.36	996.885
662	28/03/2018 13:00:00	840.431	22.28	42.23	3.346	359.2	40.47	996.154
663	28/03/2018 14:00:00	830.538	23.75	41.94	3.566	328.7	34.81	995.498
664	28/03/2018 15:00:00	632.092	24.29	43.76	2.787	321.4	35.96	994.993
665	28/03/2018 16:00:00	520.467	24.24	41.43	2.893	314.8	29.61	994.639
666	28/03/2018 17:00:00	394.228	23.29	50.22	3.234	300.2	26.04	994.628
667	28/03/2018 18:00:00	158.918	21.67	57.51	2.221	251.5	43.78	994.698
668	28/03/2018 19:00:00	10.7154	20.05	60.15	1.485	223.3	31.06	994.219
669	28/03/2018 20:00:00	0	19.46	69.24	1.605	223.2	29.95	995.209
670	28/03/2018 21:00:00	0	18.29	83.9	1.482	180.7	85.6	997.095
671	28/03/2018 22:00:00	0	16.95	89.8	1.025	51.33	21.45	997.488
672	28/03/2018 23:00:00	0	16.65	89.9	1.525	48.51	21.76	996.592
673	29/03/2018 00:00:00	0	16.89	90.2	1.972	338.3	41.92	996.319
674	29/03/2018 01:00:00	0	16.74	86	1.877	48	47.22	995.402
675	29/03/2018 02:00:00	0	16.92	81.6	2.021	350.1	38.44	995.171
676	29/03/2018 03:00:00	0.019048	17.43	83.3	1.695	3.453	44.86	995.082
677	29/03/2018 04:00:00	0	16.77	86.8	1.345	346.3	28.89	995.076
678	29/03/2018 05:00:00	0	16.71	87.7	0.718	326.6	21.16	994.818
679	29/03/2018 06:00:00	0	16.7	87.7	0.703	1.892	39.6	994.976
680	29/03/2018 07:00:00	0.116773	17.17	79.37	1.032	46.37	34.27	994.819
681	29/03/2018 08:00:00	9.90311	17.46	76.96	1.589	48.76	24.49	995.866
682	29/03/2018 09:00:00	36.3196	17.98	78.21	2.352	47.82	27.29	995.32
683	29/03/2018 10:00:00	55.5861	18.06	79.08	2.156	45.96	30.53	994.795
684	29/03/2018 11:00:00	66.8577	18.58	82.2	1.555	336.5	44.99	995.471
685	29/03/2018 12:00:00	85.4783	17.31	93.1	0.984	335.6	39.31	996.291
686	29/03/2018 13:00:00	75.1534	17.34	94.2	0.138	17.2	15.66	996.394
687	29/03/2018 14:00:00	125.241	17.28	94.7	0.779	355.6	31.69	996.14
688	29/03/2018 15:00:00	108.103	17.19	95.5	1.517	321.6	22.21	996.128
689	29/03/2018 16:00:00	140.421	17.3	95	0.898	319.2	21.94	996.268
690	29/03/2018 17:00:00	206.557	17.71	88.4	1.104	51.28	32.16	996.247
691	29/03/2018 18:00:00	39.1902	18.31	86.8	0.705	30.87	26.41	996.795
692	29/03/2018 19:00:00	4.81803	18.23	88.9	0.634	48.9	12.38	997.061
693	29/03/2018 20:00:00	0	17.95	91	0.73	44.2	15.07	997.428
694	29/03/2018 21:00:00	0	17.73	92	0.334	45.1	13.39	998.276
695	29/03/2018 22:00:00	0	17.68	93.4	0.642	325	17.31	998.939
696	29/03/2018 23:00:00	0	17.37	94	0.682	36.56	18.98	999.222
697	30/03/2018 00:00:00	0	17.4	94.8	0.654	342.9	17.14	999.331
698	30/03/2018 01:00:00	0	16.97	96.4	1.475	341.9	25.52	999.378
699	30/03/2018 02:00:00	0	16.89	96.6	0.937	322.5	20.83	999.61
700	30/03/2018 03:00:00	0	16.91	97.2	0.743	327.2	17.66	999.714
701	30/03/2018 04:00:00	0	16.8	97.5	0.747	345.8	22.15	999.462
702	30/03/2018 05:00:00	0	16.64	97.2	1.139	3.947	22.95	999.481
703	30/03/2018 06:00:00	0	16.7	97.1	1.035	5.508	21.77	999.787
704	30/03/2018 07:00:00	0.183234	16.66	97	0.686	354.9	22.57	1000.07
705	30/03/2018 08:00:00	32.8165	16.72	96.5	0.525	310.8	17.45	1000.72
706	30/03/2018 09:00:00	93.9323	16.98	95.8	0.451	334.9	28.08	1001.42
707	30/03/2018 10:00:00	237.418	17.72	92.8	0.223	179.5	28.54	1001.65
708	30/03/2018 11:00:00	469.039	19.6	90	1.043	245.4	40.45	1001.78
709	30/03/2018 12:00:00	296.97	18.41	88.7	2.221	236.4	34.05	1002.03
710	30/03/2018 13:00:00	462.31	19.61	83.8	2.145	250.7	33.53	1001.68
711	30/03/2018 14:00:00	298.484	19.86	80.8	2.211	248.2	31.44	1001.23
712	30/03/2018 15:00:00	282.176	20.01	78.11	2.366	230.1	32.83	1001.24
713	30/03/2018 16:00:00	461.522	20.8	73.43	2.37	235.5	34.39	1001.28
714	30/03/2018 17:00:00	342.792	21.09	71.04	2.311	236.7	36.59	1001.31
715	30/03/2018 18:00:00	192.582	21.04	77.27	2.38	248.9	34.61	1001.28
716	30/03/2018 19:00:00	26.0989	19.26	83.8	1.788	255.1	26	1001.54
717	30/03/2018 20:00:00	0	17.72	86.4	0.529	263	24.22	1002.03
718	30/03/2018 21:00:00	0	16.91	89.1	0.104	230.6	11.64	1002.39
719	30/03/2018 22:00:00	0	15.94	92.5	0.204	56.08	10.9	1002.8
720	30/03/2018 23:00:00	0	15.07	94.5	0.609	73.7	19.23	1002.84
721	31/03/2018 00:00:00	0	14.42	95.7	0.183	45.48	18.29	1002.68
722	31/03/2018 01:00:00	0	14	96.1	0.21	57.63	15.31	1002.68
723	31/03/2018 02:00:00	0	13.46	96.8	0.244	57.72	6.718	1002.69
724	31/03/2018 03:00:00	0	12.93	97.2	0.22	54.03	8.9	1002.46
725	31/03/2018 04:00:00	0	12.68	97.5	0.258	56.08	16.33	1002.2
726	31/03/2018 05:00:00	0	12.18	98.2	0.337	46.33	15.55	1001.93
727	31/03/2018 06:00:00	0	12.26	98.2	0.116	350.4	17.18	1001.95
728	31/03/2018 07:00:00	0.386887	11.79	98.6	0.349	63.05	19.81	1002.16
729	31/03/2018 08:00:00	68.6932	12.38	96.9	0.127	51.11	15.22	1002.29
730	31/03/2018 09:00:00	276.744	16.1	88.9	0.007	318.4	1.253	1002.5
731	31/03/2018 10:00:00	479.027	18.85	74.09	0.594	241.5	27.13	1002.62
732	31/03/2018 11:00:00	652.813	20.62	68.92	1.736	221.9	30.08	1002.49
733	31/03/2018 12:00:00	759.008	22.27	56.83	2.076	243.2	35.23	1002.2
734	31/03/2018 13:00:00	801.645	24.02	49.83	1.629	251.2	43.79	1001.75
735	31/03/2018 14:00:00	791.363	24.69	52.92	2.776	252.4	29.57	1001.16
736	31/03/2018 15:00:00	723.751	24.75	53.3	3.249	253.5	32.73	1000.67
737	31/03/2018 16:00:00	591.148	24.84	54.38	3.027	246.3	35.45	1000.32
738	31/03/2018 17:00:00	408.079	24.38	54.65	2.779	243.5	33.32	1000.17
739	31/03/2018 18:00:00	197.364	23.86	58.43	2.119	245.3	35.67	1000.07
740	31/03/2018 19:00:00	24.9248	22.13	66.41	1.375	246	73.15	999.953
741	31/03/2018 20:00:00	0	20.37	71.07	1.057	137.1	42.69	999.892
742	31/03/2018 21:00:00	0	18.99	77.29	1.232	187.1	50.48	1000.15
743	31/03/2018 22:00:00	0	17.16	85	0.843	328.5	50.96	1000.34
744	31/03/2018 23:00:00	0	15.57	88.9	0.477	345.3	29.03	999.866
745	01/04/2018 00:00:00	0	15.3	89.1	0.593	338.7	26.26	999.263
746	01/04/2018 01:00:00	0	15.14	90.8	0.694	324.5	23.09	998.863
747	01/04/2018 02:00:00	0	14.57	92.7	0.491	20	31.16	998.514
748	01/04/2018 03:00:00	0	14.12	93.9	0.453	3.022	21.05	998.018
749	01/04/2018 04:00:00	0	13.68	94.7	0.161	21.04	16.53	997.491
750	01/04/2018 05:00:00	0	13.26	95.4	0.235	40	10.81	997.138
751	01/04/2018 06:00:00	0	12.81	96.2	0.233	30.98	13.45	996.977
752	01/04/2018 07:00:00	0.346479	12.81	96.3	0.185	41.8	19.51	996.913
753	01/04/2018 08:00:00	70.7451	13.54	92.8	0.16	50.19	10.34	996.791
754	01/04/2018 09:00:00	268.872	18.08	69.91	0.081	257.2	16.91	996.699
755	01/04/2018 10:00:00	466.211	22.11	56.71	0.339	205.7	10.96	996.797
756	01/04/2018 11:00:00	634.419	24.46	47.93	0.961	219.8	26.36	996.612
757	01/04/2018 12:00:00	747.32	26.83	44.3	1.733	216.2	28.37	996.122
758	01/04/2018 13:00:00	793.774	28.7	43.69	2.245	228.3	34.69	995.505
759	01/04/2018 14:00:00	781.663	29.9	38.48	2.666	222.9	30.59	994.596
760	01/04/2018 15:00:00	704.294	30.65	33.23	2.544	246	32.37	994.002
761	01/04/2018 16:00:00	568.7	31.37	35.49	2.331	251.9	31.74	993.478
762	01/04/2018 17:00:00	331.271	29.31	46.47	2.867	243.7	32.21	993.046
763	01/04/2018 18:00:00	99.4849	27.56	44.62	1.778	221.8	31.99	993.011
764	01/04/2018 19:00:00	16.2108	26.01	58.01	1.501	227.8	25.92	992.831
765	01/04/2018 20:00:00	0	22.81	69.63	0.989	208.5	20.14	992.85
766	01/04/2018 21:00:00	0	21.39	74.5	0.516	94.4	37.23	993.036
767	01/04/2018 22:00:00	0	20.25	76.12	1.591	61.12	23.72	992.615
768	01/04/2018 23:00:00	0	20.42	76.96	0.505	5.286	42.09	992.37
769	02/04/2018 00:00:00	0	19.27	83.5	0.655	343.5	23.58	992.421
770	02/04/2018 01:00:00	0	18.68	85.6	1.129	272	85.7	992.884
771	02/04/2018 02:00:00	0	18.83	80.7	1.126	56.03	26.76	993.217
772	02/04/2018 03:00:00	0	19.14	82.3	2.154	4.63	40.27	993.228
773	02/04/2018 04:00:00	0.000621114	19.79	74.78	1.27	357.5	30.51	993.401
774	02/04/2018 05:00:00	0.0207031	20.38	69.16	1.449	42.53	34.37	993.354
775	02/04/2018 06:00:00	0	20.72	75.03	2.685	11.51	39.25	993.798
776	02/04/2018 07:00:00	0.38717	18.51	68.36	2.307	339	26.28	994.527
777	02/04/2018 08:00:00	68.3127	17.94	85.4	4.496	335.9	24.62	995.352
778	02/04/2018 09:00:00	265.75	16.78	87.3	4.317	325.8	20.36	996.348
779	02/04/2018 10:00:00	466.605	19.42	70.9	3.471	318.2	26.59	997.288
780	02/04/2018 11:00:00	631.205	21.43	63.63	2.3	309.5	32.2	997.81
781	02/04/2018 12:00:00	743.745	23.3	57.31	1.665	292.3	41.91	997.637
782	02/04/2018 13:00:00	790.016	24.6	61.33	1.934	253.8	43.81	997.486
783	02/04/2018 14:00:00	775.116	24.01	59.21	3.207	221.9	32.59	997.232
784	02/04/2018 15:00:00	697.748	24.19	66.09	3.748	228.7	34.07	996.879
785	02/04/2018 16:00:00	559.45	23.45	66.86	3.673	253.7	27.33	996.663
786	02/04/2018 17:00:00	381.196	24.06	62.01	3.301	245.1	33.79	996.494
787	02/04/2018 18:00:00	175.028	24.55	61.87	2.69	206.5	25.27	996.418
788	02/04/2018 19:00:00	19.3577	23.48	65.1	2.582	160.5	43.91	996.717
789	02/04/2018 20:00:00	0	22.48	63	3.126	141.6	38.61	996.905
790	02/04/2018 21:00:00	0	22.26	62.84	5.099	127.6	29.16	997.101
791	02/04/2018 22:00:00	0	21.75	65.47	4.592	135.4	34.56	997.576
792	02/04/2018 23:00:00	0	21.57	58.85	4.678	118.1	29.98	997.695
793	03/04/2018 00:00:00	0	21.29	59.69	4.749	123.1	31.92	997.734
794	03/04/2018 01:00:00	0	21.03	64.73	4.178	127.2	35.66	997.807
795	03/04/2018 02:00:00	0	20.39	67.86	3.336	130.5	35.33	997.814
796	03/04/2018 03:00:00	0	19.85	69.57	2.789	145.8	43.09	997.696
797	03/04/2018 04:00:00	0	19.29	72.9	2.344	161.7	42.22	997.47
798	03/04/2018 05:00:00	0	17.91	77.1	1.32	206.2	29.83	996.887
799	03/04/2018 06:00:00	0	17.99	67.15	1.694	150.2	50.41	996.816
800	03/04/2018 07:00:00	0.171639	19.92	64.81	3.793	122.5	34.68	996.975
801	03/04/2018 08:00:00	67.879	19.12	62.97	2.247	168.9	48.22	997.377
802	03/04/2018 09:00:00	267.002	19.74	67.88	2.31	196.9	45.2	997.572
803	03/04/2018 10:00:00	468.827	21.33	61.26	2.285	212.7	29.95	997.914
804	03/04/2018 11:00:00	635.239	23.57	47.65	1.925	235.5	30.43	997.903
805	03/04/2018 12:00:00	744.742	25.78	44.11	1.521	221	37.13	997.696
806	03/04/2018 13:00:00	791.895	26.98	41.19	1.912	230.5	36.24	997.282
807	03/04/2018 14:00:00	776.553	28.35	37.51	1.401	221.8	49.6	996.399
808	03/04/2018 15:00:00	695.909	29.61	40.47	1.562	250	36.47	995.428
809	03/04/2018 16:00:00	562.697	29.25	39.91	2.89	255.5	31.43	994.84
810	03/04/2018 17:00:00	379.75	29.81	41.41	2.271	251.9	35.91	994.49
811	03/04/2018 18:00:00	176.058	28.49	49.88	2.72	152.7	52.45	994.486
812	03/04/2018 19:00:00	19.7539	25.78	53.3	3.983	117.3	30.14	994.422
813	03/04/2018 20:00:00	0	24.36	55.82	4.234	110.3	26.35	994.747
814	03/04/2018 21:00:00	0	23.05	66.03	1.399	156	37.73	995.29
815	03/04/2018 22:00:00	0	22.15	63.95	1.162	115	24.9	995.757
816	03/04/2018 23:00:00	0	21.46	72.37	0.844	90.4	28.96	995.933
817	04/04/2018 00:00:00	0	18.59	83.6	0.986	330.6	20.62	996.183
818	04/04/2018 01:00:00	0	17.16	86.9	0.531	333.3	13.07	996.295
819	04/04/2018 02:00:00	0	16.67	88.9	0.587	355.5	17.04	996.436
820	04/04/2018 03:00:00	0	16.42	89.2	0.206	353.3	9.57	996.238
821	04/04/2018 04:00:00	0	16.49	89.6	0.161	336.7	7.512	996.112
822	04/04/2018 05:00:00	0	16.46	89	0.025	51.39	4.495	996.21
823	04/04/2018 06:00:00	0	16.28	89.1	0.131	40.17	6.434	996.508
824	04/04/2018 07:00:00	0	16.28	88.9	0.683	336.4	15.26	996.876
825	04/04/2018 08:00:00	41.7069	16.13	89	0.48	50.49	14.21	996.958
826	04/04/2018 09:00:00	192.899	18.23	78.36	0.441	322	23.14	997.253
827	04/04/2018 10:00:00	247.605	19.97	71.53	0.814	324.4	25.34	997.337
828	04/04/2018 11:00:00	411.643	21.43	67.28	1.03	237.6	30.08	997.419
829	04/04/2018 12:00:00	699.046	23.74	57.17	0.776	249.6	34.47	997.048
830	04/04/2018 13:00:00	786.753	25.55	56.9	1.735	233.6	44.42	996.407
831	04/04/2018 14:00:00	769.386	25.73	52.96	2.746	236.9	34.4	995.922
832	04/04/2018 15:00:00	691.955	26.46	51.84	2.598	240.7	35.68	995.19
833	04/04/2018 16:00:00	552.429	26.57	57.38	3.026	234.6	36.1	994.669
834	04/04/2018 17:00:00	367.998	25.24	58.34	3.451	238.1	33.48	994.734
835	04/04/2018 18:00:00	164.565	24.93	59.09	2.476	242.5	32.36	994.803
836	04/04/2018 19:00:00	14.8508	22.99	73.54	1.676	246.1	30.41	994.808
837	04/04/2018 20:00:00	0	20.93	77.5	0.143	275.7	13.96	995.038
838	04/04/2018 21:00:00	0	19.35	84.7	0.902	334.5	17.36	995.258
839	04/04/2018 22:00:00	0	18.02	89.7	0.967	323	18.18	995.482
840	04/04/2018 23:00:00	0	17.14	92.4	0.717	336.2	17.27	995.548
841	05/04/2018 00:00:00	0	16.58	93.8	0.359	339.5	18	995.224
842	05/04/2018 01:00:00	0	15.9	95.4	0.867	345.9	28.96	994.853
843	05/04/2018 02:00:00	0	15.51	96.5	0.78	324.2	19.07	994.592
844	05/04/2018 03:00:00	0	14.94	97.7	0.218	11.67	12.29	994.397
845	05/04/2018 04:00:00	0	14.58	98.5	0.117	9.25	7.117	993.955
846	05/04/2018 05:00:00	0	14.16	99.1	0.447	349.7	13.67	993.79
847	05/04/2018 06:00:00	0	13.61	99.6	0.44	348	19.25	994.088
848	05/04/2018 07:00:00	0.174152	13.28	99.8	0.523	349.1	28.66	994.643
849	05/04/2018 08:00:00	57.2007	13.6	99.6	0.337	354.4	16.39	994.518
850	05/04/2018 09:00:00	243.94	15.04	97.9	1.87	328.2	19.99	994.315
851	05/04/2018 10:00:00	443.088	17.28	93.5	2.238	319.6	22.29	994.402
852	05/04/2018 11:00:00	612.294	20.85	70.55	2.235	311.7	24.18	994.146
853	05/04/2018 12:00:00	730.561	23.18	62.38	2.693	313.8	27.33	993.65
854	05/04/2018 13:00:00	756.566	24.52	55.05	2.475	318.8	32.29	993.169
855	05/04/2018 14:00:00	762.312	25.54	38.38	2.933	331.1	36.79	992.617
856	05/04/2018 15:00:00	682.276	24.38	67.33	3.751	249.4	52.02	992.351
857	05/04/2018 16:00:00	450.318	22.57	63.42	2.937	215.2	33.3	992.369
858	05/04/2018 17:00:00	388.457	22.85	69.56	2.622	253.4	37.45	992.696
859	05/04/2018 18:00:00	188.025	21.22	70.28	2.349	288.2	30.39	993.017
860	05/04/2018 19:00:00	21.2308	19.25	75.11	2.256	306.1	27.19	993.314
861	05/04/2018 20:00:00	0	17.48	77.04	1.51	3.422	30.26	993.734
862	05/04/2018 21:00:00	0	16.68	78.7	0.557	42.43	17.5	994.067
863	05/04/2018 22:00:00	0	16.41	83.9	1.344	52.78	19.7	994.383
864	05/04/2018 23:00:00	0	16.5	85.6	1.645	51.97	24.33	994.505
865	06/04/2018 00:00:00	0.00786767	16.32	86.2	1.277	23.34	31.79	994.701
866	06/04/2018 01:00:00	0	16.81	82.6	2.459	23.89	30.87	994.587
867	06/04/2018 02:00:00	0	16.67	87.1	2.76	12.46	37.01	994.173
868	06/04/2018 03:00:00	0	15.62	94.9	2.328	359.5	33.67	994.186
869	06/04/2018 04:00:00	0	15.1	96.9	1.827	304.5	31.31	994.707
870	06/04/2018 05:00:00	0	14.52	97.4	0.597	4.041	24.79	994.933
871	06/04/2018 06:00:00	0	14.68	97.5	0.834	324	27.55	995.27
872	06/04/2018 07:00:00	0.0269198	14.76	97.6	0.754	325.2	19.1	995.886
873	06/04/2018 08:00:00	10.9651	14.77	97.6	0.766	312.1	24.62	996.453
874	06/04/2018 09:00:00	84.064	14.96	96.6	0.401	336.4	16.03	997.221
875	06/04/2018 10:00:00	190.138	15.51	89.6	1.571	270.8	34.3	997.966
876	06/04/2018 11:00:00	344.036	16.51	73.4	2.314	228.9	33.07	998.238
877	06/04/2018 12:00:00	507.515	17.73	57.21	1.413	210	40.13	998.13
878	06/04/2018 13:00:00	616.895	19.32	53.77	1.534	251.7	41.84	998.029
879	06/04/2018 14:00:00	650.402	19.89	43.92	2.137	271.1	42.06	997.718
880	06/04/2018 15:00:00	679.238	20.12	47.85	3.177	282.9	52.86	997.352
881	06/04/2018 16:00:00	533.491	20.08	46.26	2.388	232.5	35.1	997.412
882	06/04/2018 17:00:00	363.593	19.63	51.44	2.545	226.5	34.92	997.602
883	06/04/2018 18:00:00	156.134	18.49	55.94	2.761	222.2	33.53	997.826
884	06/04/2018 19:00:00	13.9991	16.77	62.57	2.456	223.4	30.49	998.201
885	06/04/2018 20:00:00	0	15.76	63.46	1.87	212.1	21.84	998.872
886	06/04/2018 21:00:00	0	14.83	69.98	0.759	212.8	29.62	999.191
887	06/04/2018 22:00:00	0	13.3	77.48	0.377	79.43	15.92	999.598
888	06/04/2018 23:00:00	0	12.04	83.4	0.629	56.21	21.53	999.718
889	07/04/2018 00:00:00	0	11.48	85.8	0.496	57.72	16.96	999.663
890	07/04/2018 01:00:00	0	10.99	86.9	0.539	55.26	23.39	999.439
891	07/04/2018 02:00:00	0	11.21	86	0.742	60.96	29.43	999.352
892	07/04/2018 03:00:00	0	11	86	0.687	62.06	20.29	999.393
893	07/04/2018 04:00:00	0	10.99	86.9	0.72	50.55	23.06	999.032
894	07/04/2018 05:00:00	0	10.9	88.3	0.455	35.68	15.59	998.814
895	07/04/2018 06:00:00	0	11.08	88.3	0.261	51.84	14.24	999.257
896	07/04/2018 07:00:00	0.485059	11.24	87.8	0.717	53.18	22.03	999.538
897	07/04/2018 08:00:00	15.8601	12.16	83.2	0.414	358.9	19.66	1000.06
898	07/04/2018 09:00:00	56.2034	13.66	80.7	0.186	0.467	13.91	1000.88
899	07/04/2018 10:00:00	193.612	15.77	70.69	0.19	358.8	24.19	1001.52
900	07/04/2018 11:00:00	409.819	17.33	60.22	0.98	313.4	28.75	1001.95
901	07/04/2018 12:00:00	548.204	19.33	52.33	1.012	239.7	61.83	1002.28
902	07/04/2018 13:00:00	557.514	20.11	54.04	1.211	197	51.86	1002.22
903	07/04/2018 14:00:00	413.308	19.33	60.32	2.933	217.9	30.53	1002.21
904	07/04/2018 15:00:00	447.78	19.41	52.16	2.791	216.3	32.92	1002.04
905	07/04/2018 16:00:00	572.039	20.09	50.88	3.109	220.1	34.95	1002.15
906	07/04/2018 17:00:00	372.196	19.83	57.4	3.341	215.3	30.12	1002.28
907	07/04/2018 18:00:00	162.162	18.7	62.97	4.462	212.6	29.2	1002.6
908	07/04/2018 19:00:00	13.0891	17.18	75.78	4.548	211.4	22.52	1002.92
909	07/04/2018 20:00:00	0	16.38	75.17	3.32	212	23.39	1003.56
910	07/04/2018 21:00:00	0	15.87	77.61	1.61	218.6	25.31	1004.01
911	07/04/2018 22:00:00	0	15.82	75.35	1.723	217.4	34.87	1004.03
912	07/04/2018 23:00:00	0	14.92	77.64	0.996	245.4	42.32	1004.23
913	08/04/2018 00:00:00	0	13.09	83.5	0.733	56.93	40.92	1004.23
914	08/04/2018 01:00:00	0	12.14	86.9	1.162	64.79	43.85	1004.09
915	08/04/2018 02:00:00	0	11.89	86	1.628	70.79	42.46	1004.04
916	08/04/2018 03:00:00	0	11.97	86.4	0.668	58.04	38.7	1003.74
917	08/04/2018 04:00:00	0	11.4	87.4	1.073	74.24	44.84	1003.26
918	08/04/2018 05:00:00	0	10.5	91	0.658	32.89	35.08	1002.97
919	08/04/2018 06:00:00	0	9.9	90.8	0.411	57.67	21.04	1003.01
920	08/04/2018 07:00:00	0.0296172	9.53	91.4	0.27	49.22	24.51	1002.63
921	08/04/2018 08:00:00	62.1728	10.1	88.2	0.456	30.33	29.46	1002.91
922	08/04/2018 09:00:00	259.43	14.21	71.33	1.779	344.8	28.2	1003.1
923	08/04/2018 10:00:00	463.079	17.57	58.03	1.891	323.2	32.14	1003.14
924	08/04/2018 11:00:00	631.091	20.2	48.12	1.827	218.6	28.25	1002.73
925	08/04/2018 12:00:00	746.077	21.47	41.78	2.045	224.4	33.47	1002.16
926	08/04/2018 13:00:00	797.94	23.35	37.07	1.91	229.8	32.92	1001.33
927	08/04/2018 14:00:00	779.866	25.25	33.11	1.82	221.1	37.27	1000.21
928	08/04/2018 15:00:00	696.073	26.56	34.39	2.049	242.5	37.47	999.158
929	08/04/2018 16:00:00	553.934	27.14	33.76	2.161	224.2	30.93	998.563
930	08/04/2018 17:00:00	354.941	27.27	36.53	2.271	226.4	30.56	997.853
931	08/04/2018 18:00:00	165.119	25.76	41.4	1.818	221.7	27.91	997.539
932	08/04/2018 19:00:00	10.8534	23.01	59.1	0.559	206.8	41.05	997.144
933	08/04/2018 20:00:00	0	19.38	70.53	1.205	71.32	22.52	996.776
934	08/04/2018 21:00:00	0	17.46	69.69	1.341	69.04	20.68	996.708
935	08/04/2018 22:00:00	0	16.29	71.25	0.44	54.76	14.12	996.619
936	08/04/2018 23:00:00	0	15.96	71.94	0.712	59.07	15.4	996.282
937	09/04/2018 00:00:00	0	15.84	70.18	0.545	48.6	15.62	996.009
938	09/04/2018 01:00:00	0	15.63	67.68	1.043	57.48	17.54	995.868
939	09/04/2018 02:00:00	0	15.63	59.32	1.183	48.58	18.69	994.993
940	09/04/2018 03:00:00	0	16.54	63.6	0.555	52.55	18.25	994.582
941	09/04/2018 04:00:00	0.186758	17.13	56.9	0.779	3.838	20.39	994.642
942	09/04/2018 05:00:00	0.452391	19.19	58.08	1.1	35.9	49.55	995.087
943	09/04/2018 06:00:00	0	18.32	62.53	0.783	35.04	32.37	994.827
944	09/04/2018 07:00:00	0.185925	19.12	53.74	1.307	359.1	43.03	994.969
945	09/04/2018 08:00:00	47.3965	18.75	51.63	0.69	46.93	30.45	995.229
946	09/04/2018 09:00:00	198.011	20.61	52.45	2.207	329.3	19.72	995.971
947	09/04/2018 10:00:00	277.661	21.98	44.23	2.29	321.2	20.67	996.792
948	09/04/2018 11:00:00	395.513	23.79	29.2	1.777	329.7	30.72	997.213
949	09/04/2018 12:00:00	635.217	23.42	60.39	2.83	254.3	48.48	997.593
950	09/04/2018 13:00:00	721.457	22.58	67.02	2.764	231.1	35.45	997.783
951	09/04/2018 14:00:00	736.77	21.28	69.97	4.69	219.8	31.78	997.874
952	09/04/2018 15:00:00	571.295	20.52	68.7	5.072	214.9	29.11	998.007
953	09/04/2018 16:00:00	419.562	20.3	70.45	4.733	221.6	30.69	998.365
954	09/04/2018 17:00:00	187.345	19.29	76.03	4.834	220.3	30.62	998.858
955	09/04/2018 18:00:00	56.9479	18.23	75.19	3.098	225.2	33.17	998.918
956	09/04/2018 19:00:00	2.61094	17.69	79.89	2.163	222.5	54.29	998.731
957	09/04/2018 20:00:00	0	17.41	80	2.976	219.8	30.99	999.433
958	09/04/2018 21:00:00	0	17.2	80.6	1.784	224	31.26	999.898
959	09/04/2018 22:00:00	0	16.45	84.2	0.715	190.2	60.93	1000.31
960	09/04/2018 23:00:00	0	15.37	86.8	0.506	62.41	40.31	1000.83
961	10/04/2018 00:00:00	0	15.12	85.8	0.771	66.57	64.78	1001.28
962	10/04/2018 01:00:00	0	14.53	88	0.659	59.88	35.88	1001.42
963	10/04/2018 02:00:00	0	13.84	89.5	0.532	67.15	16.84	1001.64
964	10/04/2018 03:00:00	0	13.41	90	0.63	72.89	24.63	1001.61
965	10/04/2018 04:00:00	0	13.06	90.5	0.814	49.5	49.17	1001.5
966	10/04/2018 05:00:00	0	13.11	88.9	1.312	93.2	78.18	1001.28
967	10/04/2018 06:00:00	0	13.92	86.5	1.16	110.5	62.66	1001.46
968	10/04/2018 07:00:00	0.00414165	13.8	88.5	1.212	134.9	84.3	1001.85
969	10/04/2018 08:00:00	53.8952	14.34	82.8	0.804	138.3	67.57	1002.3
970	10/04/2018 09:00:00	242.342	16.88	71.24	1.669	213.9	45.22	1002.84
971	10/04/2018 10:00:00	442.391	19.77	59.14	3.267	162.7	47.55	1003.34
972	10/04/2018 11:00:00	607.634	21.76	54.06	4.623	129.3	32.97	1003.7
973	10/04/2018 12:00:00	722.373	22.79	50.94	5.28	124.4	30.76	1003.46
974	10/04/2018 13:00:00	772.089	23.48	47.31	4.993	130.7	31.55	1003.17
975	10/04/2018 14:00:00	755.276	24.27	47.64	4.537	131.8	34.72	1003.06
976	10/04/2018 15:00:00	672.827	24.18	47.79	5.116	132.5	29.69	1002.76
977	10/04/2018 16:00:00	532.726	23.3	52.63	6.048	133.1	31.94	1002.85
978	10/04/2018 17:00:00	350.231	21.95	60.81	6.725	127.1	31.37	1003.18
979	10/04/2018 18:00:00	149.77	20.29	62.73	6.559	127.9	29.71	1003.69
980	10/04/2018 19:00:00	10.4208	19.1	65.29	6.862	129.7	30.3	1004.13
981	10/04/2018 20:00:00	0	17.9	67.12	7.557	122.7	29.08	1004.3
982	10/04/2018 21:00:00	0	17.63	67.52	7.306	121.5	28.65	1004.65
983	10/04/2018 22:00:00	0	17.49	66.7	7.028	115.1	28.09	1004.71
984	10/04/2018 23:00:00	0	17.51	66.17	7.06	111.4	26.14	1004.49
985	11/04/2018 00:00:00	0	17.39	63.63	7.211	115.6	28.58	1004.06
986	11/04/2018 01:00:00	0	17.46	60.13	6.376	117	29.05	1003.6
987	11/04/2018 02:00:00	0	17.86	56.87	6.224	111.4	27.72	1003.07
988	11/04/2018 03:00:00	0	17.8	57.44	5.831	114.2	26.9	1003.06
989	11/04/2018 04:00:00	0	17.6	56.13	6.441	113.2	26.83	1002.44
990	11/04/2018 05:00:00	0	17.48	54.93	6.167	124.6	30.31	1002.03
991	11/04/2018 06:00:00	0	17.41	54.92	6.025	127.8	28.67	1001.97
992	11/04/2018 07:00:00	0.0223607	17.32	54.88	5.659	134.2	31.03	1002.18
993	11/04/2018 08:00:00	54.4202	18.05	49.55	5.129	127.1	28.57	1002.17
994	11/04/2018 09:00:00	245.005	19.42	47.01	3.905	126.7	29.93	1002.3
995	11/04/2018 10:00:00	441.287	20.29	52.7	2.828	165	47.52	1002.39
996	11/04/2018 11:00:00	605.417	22.11	37.62	2.292	202.1	32.35	1002.35
997	11/04/2018 12:00:00	713.568	23.79	35.86	1.843	211	30.99	1001.84
998	11/04/2018 13:00:00	762.167	24.99	34.72	2.196	230.9	38.53	1001.07
999	11/04/2018 14:00:00	746.422	26.51	32.17	1.902	221.3	40.15	1000.2
1000	11/04/2018 15:00:00	665.723	27.31	31.93	2.558	146.6	40.98	999.322
1001	11/04/2018 16:00:00	531.074	27.22	32.82	3.376	129.3	33.37	998.465
1002	11/04/2018 17:00:00	348.291	27.13	33.69	3.33	123.1	28.73	998.008
1003	11/04/2018 18:00:00	145.14	25.93	37.12	3.644	113	25.49	997.782
1004	11/04/2018 19:00:00	8.48862	23.63	43.09	4.357	110.5	26.04	997.73
1005	11/04/2018 20:00:00	0	22.48	43.35	3.521	113	25.97	997.543
1006	11/04/2018 21:00:00	0	21.08	48.37	2.293	93.8	18.37	997.185
1007	11/04/2018 22:00:00	0	19.4	57.12	0.558	101.4	25.63	996.776
1008	11/04/2018 23:00:00	0	16.84	64.84	0	0	0	996.193
1009	12/04/2018 00:00:00	0	15.53	70.81	0	0	0	995.489
1010	12/04/2018 01:00:00	0	14.76	72.43	0.153	20.88	22.73	994.923
1011	12/04/2018 02:00:00	0	14.3	73.2	0.16	2.409	21.05	994.359
1012	12/04/2018 03:00:00	0	13.64	75.08	0.105	44.24	8.55	994.035
1013	12/04/2018 04:00:00	0	13.73	74.36	0.125	50.05	5.238	993.505
1014	12/04/2018 05:00:00	0	14.13	70.71	0.515	38.71	14.32	993.127
1015	12/04/2018 06:00:00	0	15.19	65.27	0.094	44.46	7.677	992.745
1016	12/04/2018 07:00:00	0.09567	15.16	69.26	0	0	0	992.636
1017	12/04/2018 08:00:00	16.1199	16	65.97	0.067	7.198	8.81	992.786
1018	12/04/2018 09:00:00	228.204	21.29	45.13	0.066	87.9	2.813	992.685
1019	12/04/2018 10:00:00	153.798	23.33	43.93	0.483	337.2	14.32	993.533
1020	12/04/2018 11:00:00	209.56	26.9	41.03	2.022	28.96	31.64	993.893
1021	12/04/2018 12:00:00	254.496	27.23	42.99	2.578	8.62	44.59	993.705
1022	12/04/2018 13:00:00	384.917	27.2	39.31	1.878	342.6	37.48	993.171
1023	12/04/2018 14:00:00	682.678	29.1	44.48	2.401	327.3	37.47	992.761
1024	12/04/2018 15:00:00	696.933	28.38	45.5	2.917	318	31.09	992.328
1025	12/04/2018 16:00:00	517.38	28.53	45.53	2.658	300.6	29.25	992.167
1026	12/04/2018 17:00:00	318.364	27.44	45.85	2.078	278.8	38.49	992.542
1027	12/04/2018 18:00:00	127.649	25.12	55.42	1.716	259.3	48.4	993.331
1028	12/04/2018 19:00:00	6.46712	22.16	62.03	2.192	337	26.65	994.179
1029	12/04/2018 20:00:00	0	20.15	68.29	0.899	320.4	24.28	995.126
1030	12/04/2018 21:00:00	0	18.91	76.07	1.913	356.2	30.43	995.759
1031	12/04/2018 22:00:00	0	16.41	86.9	2.527	331	25.34	996.858
1032	12/04/2018 23:00:00	0	15.76	88.9	1.642	5.306	34.37	997.675
1033	13/04/2018 00:00:00	0	15.72	89.1	2.195	341.7	30.07	998.209
1034	13/04/2018 01:00:00	0	15.56	90.3	2.604	341.9	26.75	998.651
1035	13/04/2018 02:00:00	0	15.5	92.6	1.676	346.7	28.27	999
1036	13/04/2018 03:00:00	0	15.31	95.8	1.575	319.7	20.34	999.345
1037	13/04/2018 04:00:00	0	15.28	96.7	1.769	333.2	22.35	999.59
1038	13/04/2018 05:00:00	0	15.4	95.8	1.164	10.09	27.71	999.918
1039	13/04/2018 06:00:00	0	15.37	95.7	1.071	0.069	27.77	1000.54
1040	13/04/2018 07:00:00	0.046999	15.34	95.3	0.76	358.2	33.36	1001.26
1041	13/04/2018 08:00:00	21.2634	15.53	94.6	1.165	328.4	18.45	1001.53
1042	13/04/2018 09:00:00	154.174	16.44	88.4	0.73	335.2	27.83	1002.31
1043	13/04/2018 10:00:00	199.166	17.42	78.36	2.323	339.7	25.22	1002.83
1044	13/04/2018 11:00:00	287.035	18.54	71.47	2.425	335.1	35.97	1003.08
1045	13/04/2018 12:00:00	507.919	19.83	62.23	2.363	318.6	27.54	1003.23
1046	13/04/2018 13:00:00	626.301	21.89	59.91	1.343	296.1	57.85	1002.91
1047	13/04/2018 14:00:00	478.462	20.73	64.81	2.909	216.7	31.53	1002.76
1048	13/04/2018 15:00:00	623.554	21.33	65.58	2.802	231.2	35.37	1002.3
1049	13/04/2018 16:00:00	500.855	20.97	63.83	3.217	230.1	35.7	1002.43
1050	13/04/2018 17:00:00	322.412	19.66	72.87	3.677	230.4	32.96	1002.74
1051	13/04/2018 18:00:00	126.941	18.42	81.7	3.379	238.7	31.94	1002.85
1052	13/04/2018 19:00:00	6.63736	16.55	88.3	2.504	242.9	33.68	1003.08
1053	13/04/2018 20:00:00	0	15.48	92.3	1.563	237.9	29.52	1003.74
1054	13/04/2018 21:00:00	0	15.09	93.4	0.47	232.5	20.22	1004.35
1055	13/04/2018 22:00:00	0	14.66	94.2	0.583	223.2	31.49	1004.82
1056	13/04/2018 23:00:00	0	13.84	94.6	0.566	67.7	15.13	1004.71
1057	14/04/2018 00:00:00	0	13.37	94.6	0.301	70.47	9.82	1004.59
1058	14/04/2018 01:00:00	0	12.79	93.8	1.098	70.62	18.36	1004.54
1059	14/04/2018 02:00:00	0	12.1	94.6	0.343	50.64	10.24	1004.35
1060	14/04/2018 03:00:00	0	11.75	95.1	0.17	61.14	16.36	1004.35
1061	14/04/2018 04:00:00	0	11.35	95.3	0.577	58.68	20.9	1003.98
1062	14/04/2018 05:00:00	0	11.04	96.3	0.385	36.18	25.58	1003.7
1063	14/04/2018 06:00:00	0	10.76	96.4	0.427	49.2	19.54	1003.87
1064	14/04/2018 07:00:00	0.0047636	10.53	96.8	0.4	41.9	16.54	1004.28
1065	14/04/2018 08:00:00	47.2568	11.14	94.6	0.361	50.77	16.65	1004.68
1066	14/04/2018 09:00:00	228.512	14.95	83.4	0.14	32.61	22.92	1005.31
1067	14/04/2018 10:00:00	420.946	18.57	69.55	0.232	313.8	13.11	1005.61
1068	14/04/2018 11:00:00	581.556	20.66	55.04	1.473	321	24.86	1005.52
1069	14/04/2018 12:00:00	687.896	22.91	50.21	1.279	302	29.55	1005.05
1070	14/04/2018 13:00:00	733.084	24.1	51.57	1.364	218.9	60.35	1004.85
1071	14/04/2018 14:00:00	717.989	24.26	49.81	2.669	230.4	38.19	1004.18
1072	14/04/2018 15:00:00	641.109	23.86	54.38	3.049	241.2	32.81	1003.68
1073	14/04/2018 16:00:00	501.981	23.21	54.89	3.247	252.7	33.47	1003.48
1074	14/04/2018 17:00:00	318.435	22.71	60.04	2.631	260.4	33.96	1003.7
1075	14/04/2018 18:00:00	122.877	21.62	64.41	1.683	256.5	34.85	1003.63
1076	14/04/2018 19:00:00	5.29649	19.69	69.88	0.436	299.8	35.27	1003.76
1077	14/04/2018 20:00:00	0	18.46	75.2	2.094	191.4	54.51	1004.08
1078	14/04/2018 21:00:00	0	17.2	79.11	1.369	189.5	52.53	1004.42
1079	14/04/2018 22:00:00	0	16.79	80.9	1.258	162.4	49.79	1004.53
1080	14/04/2018 23:00:00	0	15.61	84.7	0.386	55.3	55.52	1004.66
1081	15/04/2018 00:00:00	0	14.26	88.9	0.482	357.9	34.51	1004.64
1082	15/04/2018 01:00:00	0	13.68	90.3	0.689	27.4	49.55	1004.31
1083	15/04/2018 02:00:00	0	14.22	84.1	0.917	51.26	56.93	1003.74
1084	15/04/2018 03:00:00	0	14.16	88.2	1.059	284.8	60.27	1003.54
1085	15/04/2018 04:00:00	0	12.77	91.1	0.512	6.107	23.88	1003.29
1086	15/04/2018 05:00:00	0	12.33	92.5	0.556	7.407	24.73	1002.86
1087	15/04/2018 06:00:00	0	11.55	92.1	0.633	63.98	18.31	1002.82
1088	15/04/2018 07:00:00	0.000828452	11.1	94	0.566	32.62	13.57	1002.82
1089	15/04/2018 08:00:00	40.2998	11.73	91.2	0.48	26.16	33.51	1002.95
1090	15/04/2018 09:00:00	227.451	15.72	73.29	0.003	331.2	0.004	1003.29
1091	15/04/2018 10:00:00	424.718	20.35	61.71	0.087	217.2	5.753	1003.72
1092	15/04/2018 11:00:00	587.624	22.82	50.11	0.286	252.3	14.78	1003.81
1093	15/04/2018 12:00:00	700.045	24.5	45.2	1.767	223.4	28.08	1003.47
1094	15/04/2018 13:00:00	746.802	26.35	45.44	1.906	247.3	32.58	1002.89
1095	15/04/2018 14:00:00	727.238	27.11	41.27	2.607	240.9	30.99	1002.26
1096	15/04/2018 15:00:00	645.378	27.83	41.91	2.607	236	34.55	1001.54
1097	15/04/2018 16:00:00	506.23	27.88	42.1	2.508	239.1	33.72	1000.91
1098	15/04/2018 17:00:00	323.627	27.45	44.47	2.333	228.4	34.62	1000.47
1099	15/04/2018 18:00:00	124.181	26.62	48.03	1.659	227.3	39.72	999.963
1100	15/04/2018 19:00:00	4.23292	24.6	56.53	1.656	171.3	30.18	999.714
1101	15/04/2018 20:00:00	0	22.08	65.52	1.242	198.7	32.95	999.71
1102	15/04/2018 21:00:00	0	20.1	73.3	0.537	237.8	35.98	999.79
1103	15/04/2018 22:00:00	0	17.59	81.3	0.644	330.5	23.48	999.832
1104	15/04/2018 23:00:00	0.779099	20.64	46.68	2.227	82.8	29.22	999.704
1105	16/04/2018 00:00:00	0	20.07	72.66	1.56	200.8	30.28	999.527
1106	16/04/2018 01:00:00	0	18.38	76.86	1.256	220.1	34.35	999.272
1107	16/04/2018 02:00:00	0	16.34	84.6	0.662	331.8	35.11	999.053
1108	16/04/2018 03:00:00	0	15.62	86.3	0.909	332.4	29.57	998.799
1109	16/04/2018 04:00:00	0	15	88.3	0.672	4.127	22.78	998.312
1110	16/04/2018 05:00:00	0	15.26	85.1	0.705	357.1	19.44	997.655
1111	16/04/2018 06:00:00	0	15.14	86.7	0.024	228.4	6.758	997.692
1112	16/04/2018 07:00:00	0	14.72	87.9	0.056	64.57	4.227	997.668
1113	16/04/2018 08:00:00	19.0625	14.48	83.4	0.645	47.29	19.81	998.014
1114	16/04/2018 09:00:00	102.116	16.89	71.59	0.92	17.17	28.04	998.24
1115	16/04/2018 10:00:00	371.099	23.42	44.77	0.069	208.3	1.72	998.643
1116	16/04/2018 11:00:00	534.718	28.21	40.17	1.675	310.3	21.98	998.672
1117	16/04/2018 12:00:00	644.066	30.26	34.14	3.162	321.6	29.07	998.656
1118	16/04/2018 13:00:00	696.022	31.54	30.37	3.341	348.7	38.39	998.358
1119	16/04/2018 14:00:00	683.196	31.97	28.49	3.75	321.5	28.68	997.741
1120	16/04/2018 15:00:00	606.461	32.43	30.67	2.737	308.9	43.2	997.116
1121	16/04/2018 16:00:00	537.354	31.95	33.29	2.777	284.8	39.46	996.882
1122	16/04/2018 17:00:00	296.834	31.36	32.88	2.278	282.5	31.33	996.875
1123	16/04/2018 18:00:00	110.808	29.55	40.95	2.189	249.6	39.54	997.058
1124	16/04/2018 19:00:00	2.9136	22.36	64.11	1.808	245.6	36.99	997.741
1125	16/04/2018 20:00:00	0	19.72	67.4	0.728	205.5	28.38	998.488
1126	16/04/2018 21:00:00	0	18.69	72.13	0.073	27.01	6.794	998.64
1127	16/04/2018 22:00:00	0	17.58	75.42	0.293	33.51	6.674	998.749
1128	16/04/2018 23:00:00	0	16.48	76.71	0.132	47.42	6.893	998.896
1129	17/04/2018 00:00:00	0	15.42	78.18	0.63	35.96	8.95	998.718
1130	17/04/2018 01:00:00	0	15.23	72.06	0.661	63.51	15.96	998.473
1131	17/04/2018 02:00:00	0	15.33	74.19	0.866	44.32	20.24	998.269
1132	17/04/2018 03:00:00	0	15.35	71.81	0.502	40.31	14.75	998.149
1133	17/04/2018 04:00:00	0	15.64	71.95	1.083	40.94	26.63	997.93
1134	17/04/2018 05:00:00	0	15.58	72.02	1.381	31.31	28.86	997.989
1135	17/04/2018 06:00:00	0	15.3	75.42	0.768	42.32	20.91	998.134
1136	17/04/2018 07:00:00	0.279967	18	71.53	0.917	347.7	42.3	998.369
1137	17/04/2018 08:00:00	32.855	15.07	78.61	1.89	335.6	21.16	998.649
1138	17/04/2018 09:00:00	192.061	16.14	68.77	2.78	330.4	20.66	998.896
1139	17/04/2018 10:00:00	375.865	21.25	61.76	3.847	324	19.64	999.396
1140	17/04/2018 11:00:00	531.712	22.43	60.06	4.128	337.8	28.84	999.452
1141	17/04/2018 12:00:00	637.9	24.24	44.96	3.104	330.8	28.63	998.693
1142	17/04/2018 13:00:00	682.033	26.77	46.57	3.467	340.5	32.64	998.362
1143	17/04/2018 14:00:00	661.575	27.12	44.53	3.659	349	38.21	998.16
1144	17/04/2018 15:00:00	585.508	27.15	46	4.094	326.8	30.54	997.335
1145	17/04/2018 16:00:00	448.32	26.88	47.31	3.335	325.3	26.8	997.161
1146	17/04/2018 17:00:00	272.406	26.76	47.47	2.668	309.6	26.21	997.41
1147	17/04/2018 18:00:00	90.5319	23.81	57.31	2.518	217.4	28.23	997.846
1148	17/04/2018 19:00:00	2.40184	21.61	60.88	0.702	229.5	23.6	997.882
1149	17/04/2018 20:00:00	0	19.4	67.53	1.925	220.8	28.46	998.549
1150	17/04/2018 21:00:00	0	18.16	73.46	1.097	308.1	47.8	998.934
1151	17/04/2018 22:00:00	0	16.99	82.9	1.574	5.376	31.73	999.15
1152	17/04/2018 23:00:00	0	16.36	86.3	1.632	9.18	30.78	998.956
1153	18/04/2018 00:00:00	0	16.12	90.1	1.493	343.5	24.91	999.59
1154	18/04/2018 01:00:00	0	16.21	90.9	1.184	350.8	31.11	999.577
1155	18/04/2018 02:00:00	0	16.5	86.3	2.082	21.88	29.67	999.492
1156	18/04/2018 03:00:00	0	16.76	84.1	2.818	26.65	28.71	998.927
1157	18/04/2018 04:00:00	0	16.75	91.1	2.247	16.31	31.33	998.647
1158	18/04/2018 05:00:00	0	15.57	96.3	2.876	349.2	30.03	998.414
1159	18/04/2018 06:00:00	0	15.09	97.1	3	345	32.56	998.319
1160	18/04/2018 07:00:00	0	15.09	97	3.2	356.3	35.42	997.873
1161	18/04/2018 08:00:00	5.46664	15.27	96.6	2.702	344.8	33.44	997.92
1162	18/04/2018 09:00:00	41.4901	15.61	94.2	2.622	8.14	34.2	998.059
1163	18/04/2018 10:00:00	134.736	16.16	91.4	3.921	346.9	31.23	998.352
1164	18/04/2018 11:00:00	258.297	17.13	82.7	4.077	343.1	33.03	998.737
1165	18/04/2018 12:00:00	182.327	17.82	77.27	4.52	348.7	33.97	998.477
1166	18/04/2018 13:00:00	295.912	18.98	70.97	4.887	345.4	34.48	997.973
1167	18/04/2018 14:00:00	128.82	18.44	78.63	5.085	337.8	30.41	997.633
1168	18/04/2018 15:00:00	140.913	18.27	71.34	5.319	300.1	25.7	997.82
1169	18/04/2018 16:00:00	83.2407	17.07	87.1	5.506	286.7	25.58	998.432
1170	18/04/2018 17:00:00	31.5687	13.57	96.8	3.396	229.6	41.09	999.713
1171	18/04/2018 18:00:00	21.1336	12.65	96	2.294	189.1	65.03	1000.15
1172	18/04/2018 19:00:00	3.60101	12.92	95.6	0.493	47.99	25.96	1000.28
1173	18/04/2018 20:00:00	0	12.35	95.7	0.632	62.6	31.18	1000.99
1174	18/04/2018 21:00:00	0.00227824	11.26	95.8	0.434	62.35	15.48	1001.58
1175	18/04/2018 22:00:00	0	11.26	95.7	0.6	61.79	19.61	1002.18
1176	18/04/2018 23:00:00	0.0306527	11.37	95.7	0.719	59.73	20.23	1002.67
1177	19/04/2018 00:00:00	0	11.77	96.4	0.077	20.78	2.818	1003.15
1178	19/04/2018 01:00:00	0	11.66	96.9	0.02	48.65	1.675	1003.06
1179	19/04/2018 02:00:00	0	11.78	97.1	0.002	57.62	0.012	1003.08
1180	19/04/2018 03:00:00	0	11.77	97.1	0.29	35.15	14.27	1003.4
1181	19/04/2018 04:00:00	0	11.5	97.5	0.213	44.25	17.39	1003.52
1182	19/04/2018 05:00:00	0.00248536	12.09	97.4	0.153	321.8	14.34	1003.29
1183	19/04/2018 06:00:00	0	12.31	97.1	0.292	317.7	25.44	1003.59
1184	19/04/2018 07:00:00	0.0387301	11.79	97.4	0.036	11.1	6.118	1004.02
1185	19/04/2018 08:00:00	20.1297	11.19	97.7	0.367	54.88	12.67	1004.47
1186	19/04/2018 09:00:00	188.005	13.03	93	0.494	50.47	14.18	1004.86
1187	19/04/2018 10:00:00	257.908	15.05	82.6	0.581	7.526	23.32	1005.23
1188	19/04/2018 11:00:00	205.551	15.71	76	1.476	341	28.63	1005.52
1189	19/04/2018 12:00:00	205.398	16.25	71.36	1.122	344.5	26.29	1005.52
1190	19/04/2018 13:00:00	190.778	16.4	73.56	1.084	291.7	47.37	1005.15
1191	19/04/2018 14:00:00	243.329	16.82	69.98	1.766	289.9	30.86	1004.79
1192	19/04/2018 15:00:00	276.709	17.17	61.56	1.767	310.4	28.99	1004.29
1193	19/04/2018 16:00:00	305.711	18.11	54.68	2.039	295.7	28.08	1004.12
1194	19/04/2018 17:00:00	238.297	18.45	53.6	1.781	250.8	41.63	1003.9
1195	19/04/2018 18:00:00	106.404	17.73	60.09	1.963	250.3	32.2	1003.82
1196	19/04/2018 19:00:00	1.91433	15.87	71.78	0.576	247	18.38	1003.79
1197	19/04/2018 20:00:00	0	14.3	79.04	0.585	70.15	26.61	1004.39
1198	19/04/2018 21:00:00	0	12.87	83.5	0.684	76.76	11.92	1004.59
1199	19/04/2018 22:00:00	0	12.16	84.8	1.134	70	19.54	1004.38
1200	19/04/2018 23:00:00	0	11.07	87	0.699	68.25	21.21	1004.37
1201	20/04/2018 00:00:00	0	10.47	88.7	0.807	67.01	22.16	1004.83
1202	20/04/2018 01:00:00	0	10.05	90.8	0.606	51.21	21.32	1004.16
1203	20/04/2018 02:00:00	0	9.56	92.5	0.473	47.02	10.01	1003.93
1204	20/04/2018 03:00:00	0	9.42	93.2	0.682	54.14	23.07	1003.66
1205	20/04/2018 04:00:00	0	9.42	93.6	0.757	59.05	22.95	1003.41
1206	20/04/2018 05:00:00	0	9.17	94.4	0.548	40.92	12.46	1002.95
1207	20/04/2018 06:00:00	0	9	94.7	0.065	75.39	9.13	1003.02
1208	20/04/2018 07:00:00	0	8.8	95.6	0.328	30.38	19.46	1002.67
1209	20/04/2018 08:00:00	15.6234	9.47	94.4	0.522	60.61	29.2	1002.83
1210	20/04/2018 09:00:00	96.9728	10.9	90.9	0.093	226	16.48	1002.53
1211	20/04/2018 10:00:00	355.149	15.22	67.55	0.462	267.4	14.67	1002.78
1212	20/04/2018 11:00:00	472.709	18.11	65.06	0.76	235.9	47.64	1002.64
1213	20/04/2018 12:00:00	629.582	18.28	59.77	1.543	225.7	37.64	1002.47
1214	20/04/2018 13:00:00	678.337	19.83	57.91	1.398	223.6	45.46	1001.87
1215	20/04/2018 14:00:00	664.539	20.18	55.34	1.93	251	40.23	1001.1
1216	20/04/2018 15:00:00	589.184	20.73	57.59	2.168	239.8	39.45	1000.41
1217	20/04/2018 16:00:00	437.682	19.77	59.78	3.274	223.9	30.52	1000.34
1218	20/04/2018 17:00:00	279.782	18.99	64.08	2.769	227.7	31.76	1000.38
1219	20/04/2018 18:00:00	93.5241	17.69	72.24	2.619	221.2	30.41	1000.25
1220	20/04/2018 19:00:00	1.47043	15.72	86.8	1.602	242.4	30.39	1000.19
1221	20/04/2018 20:00:00	0	14.44	91.5	0.941	224.4	27.12	1000.51
1222	20/04/2018 21:00:00	0	14.11	93.7	0.572	186.3	39.83	1000.93
1223	20/04/2018 22:00:00	0	13.66	94.6	0.567	94.8	17.35	1001
1224	20/04/2018 23:00:00	0	12.72	96.6	0.923	62.36	19.55	1000.79
1225	21/04/2018 00:00:00	0	11.28	97.1	0.569	65.48	16.31	1000.59
1226	21/04/2018 01:00:00	0	10.94	97.3	0.241	32	10.91	1000.15
1227	21/04/2018 02:00:00	0	10.55	98.1	0.095	46.98	6.798	999.944
1228	21/04/2018 03:00:00	0	9.83	98.6	0.328	38.63	11.53	999.596
1229	21/04/2018 04:00:00	0	9.62	98.3	0.279	50.49	11.53	999.38
1230	21/04/2018 05:00:00	0	9.19	98.1	0.604	47.07	16.91	999.359
1231	21/04/2018 06:00:00	0	9.34	98.2	0.756	30.47	24.86	999.602
1232	21/04/2018 07:00:00	0	9.7	97	0.629	43.64	22.87	999.544
1233	21/04/2018 08:00:00	29.391	10.21	94.3	0.214	299.3	20.19	999.803
1234	21/04/2018 09:00:00	179.852	13.1	85.4	0.368	333.3	20.32	1000.51
1235	21/04/2018 10:00:00	346.289	16.22	71.37	1.306	332.2	19.99	1000.78
1236	21/04/2018 11:00:00	513.798	19.14	52.77	2.65	317	20.97	1001
1237	21/04/2018 12:00:00	628.124	20.67	52.14	3.188	334.4	29.88	1000.82
1238	21/04/2018 13:00:00	671.635	21.99	45.85	2.617	343	32.72	1000.78
1239	21/04/2018 14:00:00	650.791	22.87	44.25	2.953	357.2	37.6	1000.06
1240	21/04/2018 15:00:00	570.423	24.09	35.26	3.022	344.4	38.2	999.542
1241	21/04/2018 16:00:00	416.698	23.05	57.35	2.65	265.8	39.92	999.839
1242	21/04/2018 17:00:00	252.568	21.9	56.23	1.843	248.1	36.36	1000.13
1243	21/04/2018 18:00:00	85.42	20.45	63.27	1.613	287.5	20.43	1000.37
1244	21/04/2018 19:00:00	0.849218	17.75	73.21	0.773	297.7	19.03	1000.86
1245	21/04/2018 20:00:00	0	15.82	80.9	0.444	29.17	14.91	1001.37
1246	21/04/2018 21:00:00	0	14.01	87.1	0.095	46.18	5.393	1001.69
1247	21/04/2018 22:00:00	0	13.07	88.6	0.533	60.93	13.85	1001.88
1248	21/04/2018 23:00:00	0	12.57	90.4	1.017	58.91	18.3	1002.02
1249	22/04/2018 00:00:00	0	12.24	91	0.822	61.46	18.2	1002.09
1250	22/04/2018 01:00:00	0	12.03	91.8	0.581	78.38	14.88	1001.65
1251	22/04/2018 02:00:00	0	12.13	92.2	0.368	66.68	19.34	1001.41
1252	22/04/2018 03:00:00	0	11.7	93	0.524	72.76	18.94	1001.69
1253	22/04/2018 04:00:00	0	11.42	93.7	0.764	66.11	15.07	1001.57
1254	22/04/2018 05:00:00	0	11.14	94.1	0.74	64.9	26.73	1001.26
1255	22/04/2018 06:00:00	0	11.05	94.3	0.75	68.27	25	1001.53
1256	22/04/2018 07:00:00	0	11.02	95	1.489	62.81	21.21	1001.68
1257	22/04/2018 08:00:00	28.9472	11.83	93.6	0.748	59.04	30.29	1001.83
1258	22/04/2018 09:00:00	175.424	14.4	82.9	1.379	56.41	40.44	1001.8
1259	22/04/2018 10:00:00	355.709	17.53	71.25	1.543	353.5	30.99	1002
1260	22/04/2018 11:00:00	510.098	18.94	67.33	2.859	330.5	26.62	1002.07
1261	22/04/2018 12:00:00	614.159	19.92	53.57	3.772	332.1	29.29	1001.83
1262	22/04/2018 13:00:00	497.249	21.27	49.66	3.38	341.8	30.11	1001.25
1263	22/04/2018 14:00:00	628.061	23.1	49.05	3.103	339.4	31.94	1000.18
1264	22/04/2018 15:00:00	563.06	23.95	47.2	3.111	349.8	36.25	999.369
1265	22/04/2018 16:00:00	425.364	24.19	54.93	2.616	327.5	42.67	999.171
1266	22/04/2018 17:00:00	244.26	21.76	66.57	2.806	306.1	29.74	999.726
1267	22/04/2018 18:00:00	73.9606	20.06	68.66	1.183	346.7	29.45	999.93
1268	22/04/2018 19:00:00	0.861429	18.55	72.96	1.136	351.7	33.16	999.858
1269	22/04/2018 20:00:00	0	18.1	75.36	1.099	47.65	23.75	1000.07
1270	22/04/2018 21:00:00	0	17.57	77.12	0.556	50.05	19.85	1000.24
1271	22/04/2018 22:00:00	0	16.41	84.1	0.381	36.11	15.69	1000.13
1272	22/04/2018 23:00:00	0	15.55	88.2	1.21	351.7	26.87	999.799
1273	23/04/2018 00:00:00	0	15.47	91.4	1.739	342.7	28.29	999.634
1274	23/04/2018 01:00:00	0	14.97	91.4	1.352	67.03	18.06	998.905
1275	23/04/2018 02:00:00	0	14.53	95.6	1.618	348.5	30.16	998.016
1276	23/04/2018 03:00:00	0	14.06	98.2	2.07	343.4	26.82	997.374
1277	23/04/2018 04:00:00	0	13.7	99.2	1.811	343.7	27.43	996.648
1278	23/04/2018 05:00:00	0	13.27	99.6	1.098	0.863	25.53	996.05
1279	23/04/2018 06:00:00	0	13.33	99	3.197	333.7	20.76	995.928
1280	23/04/2018 07:00:00	0	12.82	99.2	2.816	336.6	21.86	996.177
1281	23/04/2018 08:00:00	30.2574	12.96	98.9	3.848	329.3	17.46	995.998
1282	23/04/2018 09:00:00	188.081	13.59	96.9	4.036	329.2	17.91	996.074
1283	23/04/2018 10:00:00	352.788	15.14	88.2	4.641	332.4	21.87	996.654
1284	23/04/2018 11:00:00	517.96	16.53	77.35	4.91	338.2	27.71	996.427
1285	23/04/2018 12:00:00	619.349	18.53	69.23	4.952	349.1	33.37	996.287
1286	23/04/2018 13:00:00	497.13	19.51	64.05	4.412	4.637	37.93	996.174
1287	23/04/2018 14:00:00	311.429	19.43	72.51	5.381	333.7	29.93	995.582
1288	23/04/2018 15:00:00	203.104	17.93	79.59	5.655	338.5	33.5	995.442
1289	23/04/2018 16:00:00	119.001	18.09	77.55	4.5	6.828	36.18	995.019
1290	23/04/2018 17:00:00	59.3802	18.65	78.75	5.149	353	33.96	994.907
1291	23/04/2018 18:00:00	12.914	17.92	86.9	5.412	349.2	33.79	995.191
1292	23/04/2018 19:00:00	0.0991729	16.24	94.8	5.077	351.4	33.7	995.3
1293	23/04/2018 20:00:00	0	15.84	97.2	4.231	336.7	32.03	996.301
1294	23/04/2018 21:00:00	0	14.88	97.2	4.943	311.3	32.53	997.687
1295	23/04/2018 22:00:00	0	13.6	97.2	1.829	339.8	54.64	999.076
1296	23/04/2018 23:00:00	0	13.57	96.6	1.631	76.09	21.97	999.198
1297	24/04/2018 00:00:00	0.0136663	13.82	95	0.364	13.66	20.96	999.656
1298	24/04/2018 01:00:00	0.14992	14.45	90.8	1.314	347.3	25.5	999.82
1299	24/04/2018 02:00:00	0	14.74	90.4	1.551	8.69	28.18	999.86
1300	24/04/2018 03:00:00	0.0144951	14.53	93.3	1.992	338.4	41.95	999.951
1301	24/04/2018 04:00:00	0	14.23	93.1	0.74	62.22	34.15	1000.17
1302	24/04/2018 05:00:00	0	14.38	93.4	0.252	18.03	18.16	999.824
1303	24/04/2018 06:00:00	0	14.3	93.8	1.578	356.2	27.96	1000.05
1304	24/04/2018 07:00:00	0	14.17	90.8	2.793	350	27.23	1000.4
1305	24/04/2018 08:00:00	13.6752	14.01	91.9	2.378	341	21.48	1000.9
1306	24/04/2018 09:00:00	149.691	14.57	88.9	2.4	337.4	24.57	1001.64
1307	24/04/2018 10:00:00	427.823	16.23	82.9	2.637	336	29.66	1002.06
1308	24/04/2018 11:00:00	353.653	16.71	86.3	2.363	331.7	32	1002.11
1309	24/04/2018 12:00:00	530.175	17.19	74.24	2.23	352	29.94	1002.03
1310	24/04/2018 13:00:00	632.252	18.83	65.38	2.792	352	39.08	1001.65
1311	24/04/2018 14:00:00	600.781	19.37	51.76	3.139	333.3	31.31	1001.09
1312	24/04/2018 15:00:00	499.761	19.88	57.67	2.744	322.3	33.37	1000.49
1313	24/04/2018 16:00:00	451.568	20.35	53.04	2.67	327.8	33.79	1000.23
1314	24/04/2018 17:00:00	267.682	20.36	59.74	2.669	313.3	25.43	999.949
1315	24/04/2018 18:00:00	72.3355	19.12	68.13	1.783	305.2	47	1000
1316	24/04/2018 19:00:00	0.579536	17.08	73.96	1.638	205.1	22.65	1000.24
1317	24/04/2018 20:00:00	0	15.97	80.3	0.503	173.2	49.99	1000.74
1318	24/04/2018 21:00:00	0	14.33	86.6	0.716	70.52	12.8	1001.1
1319	24/04/2018 22:00:00	0	13.47	89.2	0.558	62.04	20.73	1001.07
1320	24/04/2018 23:00:00	0	12.98	90.5	0.469	66.99	13.36	1000.87
1321	25/04/2018 00:00:00	0	12.46	91.6	0.26	57.57	9.11	1000.49
1322	25/04/2018 01:00:00	0	11.98	92.8	0.173	46.38	5.346	999.904
1323	25/04/2018 02:00:00	0	11.7	93.3	0.278	71.1	9.75	999.519
1324	25/04/2018 03:00:00	0	11.24	93.6	0.236	54.03	15.32	998.865
1325	25/04/2018 04:00:00	0	11.06	94.4	0.137	19.25	15.24	997.903
1326	25/04/2018 05:00:00	0	10.86	94.3	0.28	28.13	18.17	996.923
1327	25/04/2018 06:00:00	0	11.4	92.5	0.438	3.066	36.77	996.659
1328	25/04/2018 07:00:00	0	12.25	91	0.106	341.8	4.379	996.175
1329	25/04/2018 08:00:00	16.8358	12.27	90.6	0.352	66.02	12.51	995.763
1330	25/04/2018 09:00:00	97.427	14.08	83.9	0.088	32.84	11.38	995.755
1331	25/04/2018 10:00:00	232.315	16.97	72.13	0.303	346.8	25.6	995.875
1332	25/04/2018 11:00:00	326.838	19.07	64.71	2.46	329.1	27.44	996.168
1333	25/04/2018 12:00:00	529.586	19.93	66.54	3.579	349.9	32.75	996.002
1334	25/04/2018 13:00:00	391.921	19.92	62.85	4.211	356.2	38.34	995.414
1335	25/04/2018 14:00:00	586.473	21.15	49.75	5.662	341.1	32.94	994.685
1336	25/04/2018 15:00:00	606.413	21.75	44.65	5.257	335.6	31.91	994.231
1337	25/04/2018 16:00:00	258.974	21.15	42.32	5.166	335.1	30.05	994.211
1338	25/04/2018 17:00:00	70.8454	20.72	47.17	4.923	341.1	32.82	994.503
1339	25/04/2018 18:00:00	10.4237	18.03	86	6.196	328.7	28.53	995.583
1340	25/04/2018 19:00:00	0.151951	12.66	88.3	3.234	14.24	45.98	997.002
1341	25/04/2018 20:00:00	0.989402	13.93	69.35	3.778	19.48	35.66	996.766
1342	25/04/2018 21:00:00	0.117412	14.78	72.29	4.317	35.09	28.55	996.92
1343	25/04/2018 22:00:00	0	15.07	73.31	4.023	16.51	35.21	996.945
1344	25/04/2018 23:00:00	0	15.43	75.79	4.563	21.88	33.99	996.403
1345	26/04/2018 00:00:00	0	15.2	77.92	5.324	24.47	30.64	996.019
1346	26/04/2018 01:00:00	0	15.17	77.57	5.68	25.9	31.77	995.307
1347	26/04/2018 02:00:00	0	15.12	80.7	6.004	23.19	30.39	994.932
1348	26/04/2018 03:00:00	0	15.25	75.79	5.947	19.73	32.3	994.047
1349	26/04/2018 04:00:00	0	15.05	83.4	5.491	22.12	34.92	992.85
1350	26/04/2018 05:00:00	0.200241	13.42	89	5.792	25.69	32.58	992.563
1351	26/04/2018 06:00:00	0.313107	13.47	92.7	5.431	0.934	47.85	992.178
1352	26/04/2018 07:00:00	0.237132	12.73	94.9	2.478	310.1	27.27	994.026
1353	26/04/2018 08:00:00	11.9784	12.98	93.8	2.513	327.9	32.28	996.008
1354	26/04/2018 09:00:00	58.2793	13.27	89	2.104	17.27	36.58	997.27
1355	26/04/2018 10:00:00	195.324	14.63	89.9	3.484	359.5	35.63	998.145
1356	26/04/2018 11:00:00	97.3714	14.65	92.2	3.703	345.1	34.29	998.931
1357	26/04/2018 12:00:00	248.832	15.17	90.2	3.824	330	28.37	999.552
1358	26/04/2018 13:00:00	314.867	16.46	85.7	4.295	319	25.58	999.764
1359	26/04/2018 14:00:00	194.947	15.68	93.6	3.972	308.8	26.4	1000.1
1360	26/04/2018 15:00:00	310.055	16.66	78.42	3.515	303.3	25.41	1000.13
1361	26/04/2018 16:00:00	327.345	17.76	71.07	3.625	305.1	24.82	1000.15
1362	26/04/2018 17:00:00	135.419	17.6	77.65	2.947	315.3	26.1	1000.67
1363	26/04/2018 18:00:00	31.0732	16.75	85.9	2.414	316.7	25.01	1001.14
1364	26/04/2018 19:00:00	1.03377	16.13	87.3	1.159	349.9	24.23	1001.74
1365	26/04/2018 20:00:00	0	15.7	88.2	1.885	347	25.36	1002.38
1366	26/04/2018 21:00:00	0	15.12	91.2	1.167	7.267	27.14	1002.92
1367	26/04/2018 22:00:00	0	14.9	92.1	2.045	6.934	30.25	1003.29
1368	26/04/2018 23:00:00	0	15.01	91.6	2.715	359.4	30.6	1003.87
1369	27/04/2018 00:00:00	0	15.07	89	2.331	13.79	30.95	1003.98
1370	27/04/2018 01:00:00	0	15.11	87.2	2.544	31.11	28.04	1003.4
1371	27/04/2018 02:00:00	0	15.08	84.7	2.471	27.67	27.75	1003.24
1372	27/04/2018 03:00:00	0	14.88	83.1	2.246	43.28	27.13	1003.15
1373	27/04/2018 04:00:00	0	14.36	84.3	1.737	54.7	19.75	1002.68
1374	27/04/2018 05:00:00	0	13.81	86.2	1.444	54.43	19.44	1002.38
1375	27/04/2018 06:00:00	0	12.86	89.2	1.612	61.64	17.61	1002.38
1376	27/04/2018 07:00:00	0	12.2	90.6	1.133	72.82	14.17	1002.5
1377	27/04/2018 08:00:00	18.9274	12.48	87.8	1.178	35.32	33.4	1002.54
1378	27/04/2018 09:00:00	164.677	14.33	76.9	1.708	352.8	31.33	1002.81
1379	27/04/2018 10:00:00	345.017	16.77	70.18	2.269	17.57	31.18	1003.2
1380	27/04/2018 11:00:00	488.205	17.67	67.96	2.666	10.9	34.99	1002.78
1381	27/04/2018 12:00:00	573.505	18.24	67.18	3.476	357.6	34.96	1002.38
1382	27/04/2018 13:00:00	495.283	18.83	59.07	3.329	13.75	35.61	1001.78
1383	27/04/2018 14:00:00	275.978	19.16	60.51	3.332	354.3	36.05	1001.03
1384	27/04/2018 15:00:00	87.8992	17.92	76.1	3.294	316.6	27.23	1000.53
1385	27/04/2018 16:00:00	75.6621	17.16	75.13	1.223	334.1	33.49	1000.49
1386	27/04/2018 17:00:00	170.264	18.49	63.93	2.235	6.94	57.69	1000.01
1387	27/04/2018 18:00:00	48.572	17.42	79.46	3.615	303	27.05	1000.41
1388	27/04/2018 19:00:00	0.200418	15.66	86.7	2.359	316.3	31.35	1001.05
1389	27/04/2018 20:00:00	0	15.24	84.2	1.203	32.34	39.03	1001.52
1390	27/04/2018 21:00:00	0	15.3	86.6	0.974	360	29.34	1002.17
1391	27/04/2018 22:00:00	0	14.86	90.6	2.564	335.2	23.63	1002.5
1392	27/04/2018 23:00:00	0	14.91	89.9	2.095	343.5	29.09	1002.86
1393	28/04/2018 00:00:00	0	14.27	95.9	1.872	263.4	42.44	1003.47
1394	28/04/2018 01:00:00	0	13.18	98.2	2.359	234.1	32.88	1003.94
1395	28/04/2018 02:00:00	0	12.84	97.6	1.326	226.3	30.44	1004.51
1396	28/04/2018 03:00:00	0	11.97	96.8	1.517	222.2	44.62	1005.25
1397	28/04/2018 04:00:00	0	12.17	97.3	0.956	243.3	33.46	1005.7
1398	28/04/2018 05:00:00	0	12.15	92.6	1.093	226	28.89	1006.07
1399	28/04/2018 06:00:00	0.120126	12.35	79.56	0.928	184.9	29.3	1006.57
1400	28/04/2018 07:00:00	0	11.39	86.5	0.821	116.5	48.75	1007.04
1401	28/04/2018 08:00:00	21.7895	10.18	83.5	1.624	83.5	14.42	1007.64
1402	28/04/2018 09:00:00	164.371	12.63	63.03	1.023	112.9	45.36	1008.07
1403	28/04/2018 10:00:00	347.98	15.28	55.3	1.665	181.8	34.13	1008.37
1404	28/04/2018 11:00:00	505.646	16.28	46.92	1.925	164.8	43.92	1008.24
1405	28/04/2018 12:00:00	611.332	17.17	45.86	1.776	224.2	39.16	1007.86
1406	28/04/2018 13:00:00	653.039	17.93	45.6	1.688	246.5	39.86	1007.41
1407	28/04/2018 14:00:00	635.003	18.84	44.68	1.442	270.4	60.33	1006.72
1408	28/04/2018 15:00:00	552.687	19.36	42.83	1.563	237.3	52.6	1005.87
1409	28/04/2018 16:00:00	413.971	19.28	49.51	1.874	235	41.77	1005.5
1410	28/04/2018 17:00:00	238.607	18.52	53.16	1.976	248.3	28.13	1005.36
1411	28/04/2018 18:00:00	62.4689	17.57	63.35	1.17	237.6	27.73	1005.11
1412	28/04/2018 19:00:00	0	15.23	74.52	0.616	208.9	28.92	1005.05
1413	28/04/2018 20:00:00	0	12.76	79.93	1.239	78.58	14.68	1005.05
1414	28/04/2018 21:00:00	0	11.29	84.8	0.669	51.84	18.72	1004.75
1415	28/04/2018 22:00:00	0	10.79	82.7	0.424	36.27	15.12	1004.58
1416	28/04/2018 23:00:00	0	10.72	83.5	0.661	30.17	19.81	1004.2
1417	29/04/2018 00:00:00	0	11.05	84.8	0.127	12	6.274	1003.95
1418	29/04/2018 01:00:00	0	10.24	85.6	0.563	58.04	18.95	1003.68
1419	29/04/2018 02:00:00	0	9.82	88	0.625	36.51	18.7	1003.5
1420	29/04/2018 03:00:00	0	9.85	86.6	0.765	52.87	21.31	1003.58
1421	29/04/2018 04:00:00	0	9.92	85.8	0.73	54.61	31.6	1003.2
1422	29/04/2018 05:00:00	0	10.3	85.2	0.502	43.26	37.1	1002.59
1423	29/04/2018 06:00:00	0	10.57	85.6	0.57	57.77	33.53	1002.6
1424	29/04/2018 07:00:00	0	10.79	85.1	1.112	199.5	61.31	1003
1425	29/04/2018 08:00:00	24.7682	11.07	85	0.789	326.9	61.14	1004.06
1426	29/04/2018 09:00:00	144.354	12.61	72.54	1.245	66.75	15.54	1004.12
1427	29/04/2018 10:00:00	325.565	15	68.12	1.862	264.4	79.81	1004.1
1428	29/04/2018 11:00:00	502.176	16.92	56.31	1.677	240.2	37.81	1005
1429	29/04/2018 12:00:00	597.291	18.49	50.46	1.54	222.3	28.62	1005.43
1430	29/04/2018 13:00:00	643.682	18.96	44.67	3.107	231.6	33.36	1005.83
1431	29/04/2018 14:00:00	629.389	20.29	38.25	2.56	240.8	35.66	1005.35
1432	29/04/2018 15:00:00	548.695	19.61	47.94	4.002	233.4	33.24	1005.35
1433	29/04/2018 16:00:00	410.7	18.34	55.86	4.963	221.6	32.66	1005.82
1434	29/04/2018 17:00:00	233.529	18.15	52.72	4.025	232.4	34.98	1006.25
1435	29/04/2018 18:00:00	62.0376	18.34	55.17	2.516	224.3	29.97	1006.79
1436	29/04/2018 19:00:00	0.101037	15.95	64.5	1.463	242.1	41.96	1007.37
1437	29/04/2018 20:00:00	0	14.16	73.19	0.603	181.2	70.42	1007.91
1438	29/04/2018 21:00:00	0	11.99	79.08	0.974	70.71	22.36	1007.95
1439	29/04/2018 22:00:00	0	10.8	82.4	1.42	66.41	19.73	1007.97
1440	29/04/2018 23:00:00	0	10.7	80.8	1.158	50.64	39.03	1007.96
1441	30/04/2018 00:00:00	0	10.45	83.1	0.473	54.14	42.14	1008.42
1442	30/04/2018 01:00:00	0	9.23	86.1	0.24	53.2	19.61	1008.26
1443	30/04/2018 02:00:00	0	8.6	87.3	0.824	56.86	26.08	1008.48
1444	30/04/2018 03:00:00	0	8.62	87.4	0.602	53.3	43.44	1008.38
1445	30/04/2018 04:00:00	0	8.39	86.7	0.411	25.92	42.56	1007.75
1446	30/04/2018 05:00:00	0	8.45	88	0.664	357.2	28.8	1007.31
1447	30/04/2018 06:00:00	0	7.518	87.6	0.528	51.47	12.38	1007.14
1448	30/04/2018 07:00:00	0	7.222	87	0.604	60.36	30.09	1007.13
1449	30/04/2018 08:00:00	20.3697	7.579	83.7	0.528	33.8	24.87	1007.12
1450	30/04/2018 09:00:00	166.134	12.42	58.19	0.341	36.66	31.1	1006.93
1451	30/04/2018 10:00:00	347.046	17.6	53.11	0.239	92.8	12.68	1007.03
1452	30/04/2018 11:00:00	500.413	21.43	30.58	0.003	220.8	2.288	1006.96
1453	30/04/2018 12:00:00	606.005	22.72	33.77	0.26	282.4	23.3	1006.65
1454	30/04/2018 13:00:00	651.693	24.19	27.34	0.558	331.2	32.48	1006.12
1455	30/04/2018 14:00:00	630.114	25.63	23.73	0.597	223.6	40.84	1005.28
1456	30/04/2018 15:00:00	547.668	26.34	22.14	0.719	47.43	40.77	1004.31
1457	30/04/2018 16:00:00	406.902	26.7	21.06	0.941	335.4	39.81	1003.72
1458	30/04/2018 17:00:00	228.123	22.9	36.62	2.475	242.8	32.36	1003.76
1459	30/04/2018 18:00:00	57.7952	20.46	46.86	0.82	258.3	27.91	1004.2
1460	30/04/2018 19:00:00	0	17.21	62.05	0.719	84.9	16.8	1004.49
1461	30/04/2018 20:00:00	0	14.24	72.46	1.432	61.12	21.73	1004.23
1462	30/04/2018 21:00:00	0	12.62	75.02	0.842	55.79	25.43	1004.29
1463	30/04/2018 22:00:00	0	11.47	78.14	0.45	54.97	14.43	1004.14
1464	30/04/2018 23:00:00	0	10.96	80.3	0.774	54.53	22.04	1003.89
1465	01/05/2018 00:00:00	0	10.43	77.99	0.268	58.53	9.54	1003.39
1466	01/05/2018 01:00:00	0	10.09	79.24	0.643	45.49	25.13	1003.04
1467	01/05/2018 02:00:00	0	10.09	76.92	0.454	44.65	13.02	1002.35
1468	01/05/2018 03:00:00	0	9.82	77.38	0.456	48.17	26.51	1002.1
1469	01/05/2018 04:00:00	0	9.93	73.09	0.763	39.87	16.75	1001.18
1470	01/05/2018 05:00:00	0.00186402	10.33	68.85	0.987	34.54	39	1000.49
1471	01/05/2018 06:00:00	0	10.81	71.43	0.951	28.77	44.35	1000.04
1472	01/05/2018 07:00:00	0	10.47	71.48	0.692	49.68	15.77	1000.34
1473	01/05/2018 08:00:00	25.2721	10.89	66.42	0.682	53.78	22.57	1000.49
1474	01/05/2018 09:00:00	163.727	15.03	58.09	0.728	52.56	16.42	1000.47
1475	01/05/2018 10:00:00	211.794	17.67	52.09	0.659	330	39.16	1000.26
1476	01/05/2018 11:00:00	446.487	22.25	31.36	0.535	245.6	24.35	1000.76
1477	01/05/2018 12:00:00	509.018	24.67	26.56	0.826	115.3	64.75	1000.66
1478	01/05/2018 13:00:00	390.623	26.72	24.25	0.138	279.7	21.33	999.977
1479	01/05/2018 14:00:00	413.809	27.33	25.8	0.307	317.3	41.02	999.23
1480	01/05/2018 15:00:00	543.715	27.17	36.73	1.714	222.2	25.38	998.708
1481	01/05/2018 16:00:00	276.998	22.41	59.9	2.698	236.3	33.18	998.5
1482	01/05/2018 17:00:00	150.265	19.49	70.5	1.735	249.7	27.12	998.773
1483	01/05/2018 18:00:00	72.9599	18.94	70.48	0.672	228	24.11	998.75
1484	01/05/2018 19:00:00	0	17.36	78.88	0.41	162.3	49.37	998.495
1485	01/05/2018 20:00:00	0	15.53	83.2	1.064	80.3	13.18	998.664
1486	01/05/2018 21:00:00	0	14.12	85.2	0.89	65.78	22.15	998.468
1487	01/05/2018 22:00:00	0	13.26	81.4	0.337	51.97	14.83	998.354
1488	01/05/2018 23:00:00	0	12.61	80.9	0.366	66.74	6.547	998.55
1489	02/05/2018 00:00:00	0	12.26	84	1.415	27.88	38.74	997.73
1490	02/05/2018 01:00:00	0.00911297	12.89	84.1	0.39	293	29.71	998.222
1491	02/05/2018 02:00:00	0.00414226	12.32	87.3	1.09	328.1	42.68	998.633
1492	02/05/2018 03:00:00	0	12.06	90.3	0.428	44.78	32.7	999.427
1493	02/05/2018 04:00:00	0	11.82	92.3	1.004	15.45	69.48	1000.12
1494	02/05/2018 05:00:00	0	12.26	90.3	0.835	67.55	42.56	1000.19
1495	02/05/2018 06:00:00	0	13.22	91.5	1.18	53.81	31.06	1000.19
1496	02/05/2018 07:00:00	0	14.11	89.9	1.751	52.03	21.86	1000.44
1497	02/05/2018 08:00:00	16.6944	14.27	85.3	1.752	23.92	22.8	1000.89
1498	02/05/2018 09:00:00	144.182	15.63	79.11	1.912	31.2	30.07	1001.46
1499	02/05/2018 10:00:00	84.0734	15.58	77.2	2.725	22.45	35.18	1002.06
1500	02/05/2018 11:00:00	159.353	15.27	85.1	2.611	13.02	33.56	1002.38
1501	02/05/2018 12:00:00	163.195	14.69	93.2	1.824	4.998	34.27	1003.01
1502	02/05/2018 13:00:00	274.372	15.89	86	2.388	0.147	33.24	1002.83
1503	02/05/2018 14:00:00	195.434	16.51	84.8	3.088	341.4	28.74	1002.17
1504	02/05/2018 15:00:00	213.411	17.27	78.83	2.785	334.1	30.61	1002
1505	02/05/2018 16:00:00	175.541	17.57	77.23	3.008	302.6	23.45	1002.36
1506	02/05/2018 17:00:00	169.503	17.88	80.8	2.407	310.1	24.25	1002.88
1507	02/05/2018 18:00:00	18.0857	16.89	88.4	1.639	264.8	45.75	1003.5
1508	02/05/2018 19:00:00	0	15.77	93.8	0.823	209.6	50.27	1004.24
1509	02/05/2018 20:00:00	0	15.4	94.8	0.105	306.4	28.24	1004.84
1510	02/05/2018 21:00:00	0	15.27	95.9	0	0	0	1005.35
1511	02/05/2018 22:00:00	0	14.92	97.2	0.458	223.2	16.53	1005.8
1512	02/05/2018 23:00:00	0	14.7	97.9	0.106	59.12	4.134	1006.14
1513	03/05/2018 00:00:00	0	14.42	98.3	0.064	46.96	3.288	1006.21
1514	03/05/2018 01:00:00	0	13.6	98.5	0.354	86.5	14.65	1006.09
1515	03/05/2018 02:00:00	0	12.84	98	0.427	149.2	24.8	1006.17
1516	03/05/2018 03:00:00	0	14.14	89.6	1.097	121.8	55.94	1006.21
1517	03/05/2018 04:00:00	0	14.57	80.8	1.112	160.5	36.98	1006.04
1518	03/05/2018 05:00:00	0	15.81	73.63	2.41	138.4	42.01	1005.25
1519	03/05/2018 06:00:00	0	14.64	82.5	1.993	181.9	47.57	1004.98
1520	03/05/2018 07:00:00	0.00269199	15.21	79.57	2.788	153	42.6	1004.98
1521	03/05/2018 08:00:00	16.9806	15.54	67.23	2.977	138.7	35.01	1004.95
1522	03/05/2018 09:00:00	151.542	15.27	78.08	2.168	207.6	39.23	1005.45
1523	03/05/2018 10:00:00	341.187	16.46	67.57	1.19	225.4	23.96	1006.25
1524	03/05/2018 11:00:00	505.259	19.3	53.89	0.73	277.9	38.85	1006.35
1525	03/05/2018 12:00:00	605.602	20.68	51.58	0.897	320.2	31.18	1006.17
1526	03/05/2018 13:00:00	647.987	21.01	46.98	1.134	205.4	36.75	1005.78
1527	03/05/2018 14:00:00	627.807	21.94	47.31	1.05	216.1	42.62	1004.75
1528	03/05/2018 15:00:00	544.151	21.97	47.72	1.947	231.4	36.72	1004.31
1529	03/05/2018 16:00:00	387.303	22.62	42.71	1.578	180.4	55.97	1003.87
1530	03/05/2018 17:00:00	219.999	22.44	42.29	2.684	132	31.52	1003.22
1531	03/05/2018 18:00:00	64.3435	21.65	51.36	1.392	154.3	27.68	1003.09
1532	03/05/2018 19:00:00	0	19.72	52.7	1.618	101.2	29.97	1002.96
1533	03/05/2018 20:00:00	0	16.28	67.73	1.293	66.05	18.71	1002.75
1534	03/05/2018 21:00:00	0	13.42	76.13	0.206	55.68	7.813	1002.54
1535	03/05/2018 22:00:00	0	12.14	77.69	0.918	38.41	17.42	1002.54
1536	03/05/2018 23:00:00	0	11.51	81.4	0.116	50.49	12.02	1002.84
1537	04/05/2018 00:00:00	0	10.29	83.7	0.892	48.02	22.77	1003.04
1538	04/05/2018 01:00:00	0	10.03	84.3	1.294	42.56	24.47	1002.79
1539	04/05/2018 02:00:00	0	10.5	73.9	1.492	57.33	20.05	1002.84
1540	04/05/2018 03:00:00	0.00932009	12.61	58.36	1.472	67.8	25.95	1002.36
1541	04/05/2018 04:00:00	0	11.2	72.93	1.215	67.17	29.56	1001.81
1542	04/05/2018 05:00:00	0	9.9	74.49	1.18	61.48	22.32	1001.58
1543	04/05/2018 06:00:00	0	9.23	76.91	1.045	49.89	20.41	1001.37
1544	04/05/2018 07:00:00	0	8.98	80.5	0.582	50.35	12	1001.34
1545	04/05/2018 08:00:00	21.7326	9.6	77.31	0.593	44.41	11.56	1001.5
1546	04/05/2018 09:00:00	173.091	13.66	58.15	0.579	29.75	14.95	1001.6
1547	04/05/2018 10:00:00	349.94	19.99	47.16	0.316	24.42	11.46	1001.54
1548	04/05/2018 11:00:00	507.69	23.54	33.87	0.075	343.3	8.22	1001.32
1549	04/05/2018 12:00:00	605.726	27.62	27.24	0.042	231.1	6.356	1001.09
1550	04/05/2018 13:00:00	648.889	29.08	20.56	0.453	310.3	48	1000.35
1551	04/05/2018 14:00:00	629.477	28.96	20.11	1.013	257.9	41.74	999.478
1552	04/05/2018 15:00:00	546.929	29.4	24.12	0.732	157.4	59.43	999.02
1553	04/05/2018 16:00:00	410.266	28.47	24.27	1.829	226.5	28.18	998.755
1554	04/05/2018 17:00:00	235.061	27.24	33.96	1.398	228	30.05	998.724
1555	04/05/2018 18:00:00	56.4061	25.19	49.24	0.188	210.4	6.927	998.356
1556	04/05/2018 19:00:00	0	19.36	53.4	0.971	67.15	28.77	998.219
1557	04/05/2018 20:00:00	0	17.19	60.86	0.679	50.86	22.36	998.446
1558	04/05/2018 21:00:00	0	15.26	51.53	1.207	44.49	16.29	998.262
1559	04/05/2018 22:00:00	0.0318876	17.94	32.44	2.325	70.21	25.31	998.132
1560	04/05/2018 23:00:00	0.00165638	19.26	46.75	2.548	68.47	27	997.994
1561	05/05/2018 00:00:00	0.00207044	16.17	51.85	1.609	43.77	28.2	997.821
1562	05/05/2018 01:00:00	0	16.18	52.18	1.718	43.8	24.88	997.585
1563	05/05/2018 02:00:00	0	17.06	44.05	1.301	33.83	18.38	997.611
1564	05/05/2018 03:00:00	0	15.8	57.87	1.86	350.2	29.47	997.753
1565	05/05/2018 04:00:00	0.00869716	14.41	48.9	1.198	42.08	31.03	997.98
1566	05/05/2018 05:00:00	0.00103545	15.46	47.3	1.436	7.342	21.36	998.149
1567	05/05/2018 06:00:00	0.043902	16.7	36.95	1.679	16.6	36.03	998.316
1568	05/05/2018 07:00:00	0	16.79	51.89	1.351	352.5	32.1	999.258
1569	05/05/2018 08:00:00	19.6871	17.88	30.17	2.379	55.99	21.16	999.699
1570	05/05/2018 09:00:00	178.638	20.55	33.77	2.5	44.55	22.03	1000.18
1571	05/05/2018 10:00:00	345.077	21.74	31.88	2.728	30.05	33.3	1000.82
1572	05/05/2018 11:00:00	413.578	21.83	32.72	3.108	27.19	31.63	1000.66
1573	05/05/2018 12:00:00	613.542	23.26	31.93	3.373	10.11	36.27	1000.48
1574	05/05/2018 13:00:00	666.18	23.67	30.5	3.856	356.2	34.32	999.948
1575	05/05/2018 14:00:00	619.702	24.37	29.97	4.114	4.905	38.44	999.271
1576	05/05/2018 15:00:00	556.683	25.04	29.04	3.99	349	37.45	999.127
1577	05/05/2018 16:00:00	412.774	23.29	52.97	3.678	330.5	32.86	999.276
1578	05/05/2018 17:00:00	230.01	22.2	59.76	2.441	318.4	27.1	999.307
1579	05/05/2018 18:00:00	57.6215	19.66	71	2.803	320.1	21.13	999.538
1580	05/05/2018 19:00:00	0.0225603	17.13	76.66	1.296	3.678	50.82	1000.82
1581	05/05/2018 20:00:00	0	15.87	81.1	1.442	49.08	24.02	1001.18
1582	05/05/2018 21:00:00	0	14.98	82.2	1.15	54.66	23.45	1001.29
1583	05/05/2018 22:00:00	0	15.4	83.2	1.25	18.1	48.34	1001.59
1584	05/05/2018 23:00:00	0	14.71	86.4	0.821	60.98	30.31	1001.79
1585	06/05/2018 00:00:00	0	14.11	86.3	0.968	73.33	20.99	1001.78
1586	06/05/2018 01:00:00	0	14	87.4	0.592	52.81	54.23	1001.24
1587	06/05/2018 02:00:00	0	13.98	87.6	0.493	262.9	69.85	1001.03
1588	06/05/2018 03:00:00	0	14.04	88.3	0.656	85.1	22.33	1000.31
1589	06/05/2018 04:00:00	0	14.08	89.2	0.343	265	50.29	999.457
1590	06/05/2018 05:00:00	0	14.07	89.1	0.086	213.6	7.527	999.379
1591	06/05/2018 06:00:00	0	13.4	91.6	0.497	58.38	26.98	999.295
1592	06/05/2018 07:00:00	0	12.96	92.5	0.513	177.7	48.79	999.705
1593	06/05/2018 08:00:00	19.844	12.26	91.6	0.766	71.32	20.15	1000.09
1594	06/05/2018 09:00:00	115.448	13.86	86.9	0.542	39.13	43.64	1000.44
1595	06/05/2018 10:00:00	214.998	15.8	77.22	0.119	95.4	9.95	1000.66
1596	06/05/2018 11:00:00	473.918	19.31	67.14	0.569	227.9	20.73	1000.67
1597	06/05/2018 12:00:00	565.971	21.83	51.24	0.34	218.6	16.81	1000.3
1598	06/05/2018 13:00:00	606.859	23.78	47.29	0.915	224.9	25.52	999.883
1599	06/05/2018 14:00:00	592.327	24.46	53.36	2.101	223.1	32.17	999.13
1600	06/05/2018 15:00:00	542.726	23.32	59.18	2.756	230.5	33.2	998.849
1601	06/05/2018 16:00:00	311.999	20.53	64.3	2.372	247.2	33.13	998.957
1602	06/05/2018 17:00:00	109.767	19	73	1.261	239.6	31.12	998.702
1603	06/05/2018 18:00:00	21.1124	17.87	79.19	1.718	220.4	27.18	998.565
1604	06/05/2018 19:00:00	0.0476147	16.88	82.6	0.84	220.4	23.71	998.472
1605	06/05/2018 20:00:00	0	16.85	82.9	0.313	141.5	44.09	998.127
1606	06/05/2018 21:00:00	0	16.9	84	0.141	85.8	15.26	997.652
1607	06/05/2018 22:00:00	0	16.64	85.3	0.297	110.5	24.55	996.593
1608	06/05/2018 23:00:00	0	16.01	86.8	0.078	275.6	26.74	996.142
1609	07/05/2018 00:00:00	0	15.5	88	0.283	62.93	46.69	995.894
1610	07/05/2018 01:00:00	0	14.92	89.3	0.25	18.46	36.71	995.06
1611	07/05/2018 02:00:00	0.0138742	14.59	89.4	0.504	31.7	42.82	994.516
1612	07/05/2018 03:00:00	0.0807592	15.21	86.6	0.454	38.1	25.66	994.025
1613	07/05/2018 04:00:00	1.89934	19.03	29.05	0.973	20.26	26.63	992.864
1614	07/05/2018 05:00:00	0.679525	28.7	19.65	3.74	35.24	24.97	991.941
1615	07/05/2018 06:00:00	0	29.35	18.77	4.525	34.66	25.92	991.642
1616	07/05/2018 07:00:00	0	29.28	17.81	5.039	37.4	28.52	991.458
1617	07/05/2018 08:00:00	10.354	29.02	20.16	4.604	30.48	30.53	991.677
1618	07/05/2018 09:00:00	40.8274	24.95	33.02	2.335	327.6	23.08	992.59
1619	07/05/2018 10:00:00	56.37	24.01	25.8	2.478	6.601	32.25	993.311
1620	07/05/2018 11:00:00	149.826	24.27	29.87	3.55	6.623	37.32	993.859
1621	07/05/2018 12:00:00	225.244	24.2	37.41	4.591	17.36	33.64	994.777
1622	07/05/2018 13:00:00	84.2451	21.36	56.57	3.07	350.2	34.64	996.163
1623	07/05/2018 14:00:00	88.7658	20.09	65.95	3.231	9.11	32.69	995.794
1624	07/05/2018 15:00:00	146.899	19.59	70.34	3.138	13.77	39.34	994.996
1625	07/05/2018 16:00:00	110.529	19.74	67.24	3.149	17.65	35.87	994.778
1626	07/05/2018 17:00:00	79.6906	20.38	57.9	3.834	14.84	36.03	995.027
1627	07/05/2018 18:00:00	21.7385	19.69	70.66	4.749	341.5	32.54	995.831
1628	07/05/2018 19:00:00	0.0651977	18.15	78.01	4.513	351.9	34.07	996.495
1629	07/05/2018 20:00:00	0	17.17	77.95	4.3	5.529	38.02	996.555
1630	07/05/2018 21:00:00	0	16.66	79.64	4.754	2.451	38.56	997.069
1631	07/05/2018 22:00:00	0	16.45	80.5	4.571	6.341	36.82	997.436
1632	07/05/2018 23:00:00	0	16.54	84.6	4.674	12.15	36.7	997.039
1633	08/05/2018 00:00:00	0.0356115	15.68	87.5	4.276	8.37	40.04	996.946
1634	08/05/2018 01:00:00	0.128784	15.75	86.8	4.165	3.728	37.32	996.648
1635	08/05/2018 02:00:00	0.242456	15.18	92.1	4.784	350.4	36.06	996.648
1636	08/05/2018 03:00:00	0	14.59	91.7	2.325	5.895	36.57	997.054
1637	08/05/2018 04:00:00	0.109958	14.48	92.2	2.576	3.231	33.59	996.919
1638	08/05/2018 05:00:00	0	13.98	86.7	2.464	358.3	36.38	996.863
1639	08/05/2018 06:00:00	0.0935964	14.01	84.1	4.522	26.23	32.87	997.312
1640	08/05/2018 07:00:00	0.00186368	13.92	88.9	4.957	3.432	36.13	997.497
1641	08/05/2018 08:00:00	2.48941	12.93	93.9	3.908	339	32.41	998.149
1642	08/05/2018 09:00:00	35.3879	12.99	95.1	3.561	341.2	31.82	998.929
1643	08/05/2018 10:00:00	71.8103	12.93	93.8	2.497	350	34.17	999.615
1644	08/05/2018 11:00:00	185.226	13.87	88.3	3.313	3.729	35.81	999.135
1645	08/05/2018 12:00:00	323.195	15.39	75.41	3.971	344.7	36.94	998.866
1646	08/05/2018 13:00:00	178.396	14.99	88.8	4.178	342.3	32.77	998.614
1647	08/05/2018 14:00:00	297.62	15.19	76.11	4.57	337	29.39	998.173
1648	08/05/2018 15:00:00	249.633	16.45	71.84	6.013	324.5	24.91	997.71
1649	08/05/2018 16:00:00	191.652	16.33	81.7	4.893	323.3	28.5	997.929
1650	08/05/2018 17:00:00	55.9942	14.16	89.7	2.989	337.4	31.43	998.9
1651	08/05/2018 18:00:00	20.0952	14.1	82.4	2.459	323.4	28.26	999.453
1652	08/05/2018 19:00:00	0.0685422	13.93	83.4	2.018	345.1	29.75	999.781
1653	08/05/2018 20:00:00	0	13.56	84.5	1.774	346.5	29.08	1000.48
1654	08/05/2018 21:00:00	0.00579825	13.43	87.2	1.52	346.4	31.54	1001.09
1655	08/05/2018 22:00:00	0	13.68	86.9	2.26	350	33.83	1001.37
1656	08/05/2018 23:00:00	0	13.45	88	1.556	344.9	30.06	1001.6
1657	09/05/2018 00:00:00	0	13.15	87.3	3.116	338.6	28.89	1001.57
1658	09/05/2018 01:00:00	0	13.2	87	2.687	327.6	20.42	1001.6
1659	09/05/2018 02:00:00	0	13.27	84.1	2.014	333.1	25.53	1001.7
1660	09/05/2018 03:00:00	0	13.22	83.4	1.271	346.6	28.9	1001.76
1661	09/05/2018 04:00:00	0	13.38	82.8	1.947	334.6	21.86	1001.67
1662	09/05/2018 05:00:00	0	13.37	84.1	1.489	334	26.67	1001.62
1663	09/05/2018 06:00:00	0	13.6	81.6	1.895	339.3	27.98	1001.91
1664	09/05/2018 07:00:00	0	13.59	84	1.557	330	28.32	1002.51
1665	09/05/2018 08:00:00	6.3249	13.27	86.4	1.571	337.4	21.87	1002.95
1666	09/05/2018 09:00:00	58.8291	13.45	84.5	1.127	329.9	23.55	1003.49
1667	09/05/2018 10:00:00	128.669	14.61	77.56	1.914	343.9	27.4	1003.88
1668	09/05/2018 11:00:00	149.739	15.08	75.57	2.035	329.7	25.27	1004.19
1669	09/05/2018 12:00:00	296.297	16.36	72.78	1.933	337.1	34.16	1003.9
1670	09/05/2018 13:00:00	327.518	16.78	63.48	2.144	342.7	31.4	1003.58
1671	09/05/2018 14:00:00	245.057	17	65.93	2.587	329.9	27.22	1002.98
1672	09/05/2018 15:00:00	334.4	17.42	56.86	1.361	316.1	31.15	1002.46
1673	09/05/2018 16:00:00	334.08	18.2	55.67	1.634	301.6	33.87	1002.36
1674	09/05/2018 17:00:00	201.678	18.15	53.77	1.211	310.7	30.4	1002.32
1675	09/05/2018 18:00:00	47.7027	16.77	64.85	1.871	219.4	27.18	1002.26
1676	09/05/2018 19:00:00	0	14.72	73.32	1.223	222.2	21.36	1002.48
1677	09/05/2018 20:00:00	0	13.34	78.69	0.144	316.1	24.3	1002.75
1678	09/05/2018 21:00:00	0	11.67	86.1	0.352	85.8	15.89	1002.77
1679	09/05/2018 22:00:00	0	10.47	88.6	0.392	79.22	14.94	1002.57
1680	09/05/2018 23:00:00	0	9.61	90.3	0.867	63.77	17.87	1002.6
1681	10/05/2018 00:00:00	0	9.06	91.4	0.802	59.38	17.36	1002.35
1682	10/05/2018 01:00:00	0	8.48	93.1	0.726	49.67	16.93	1001.61
1683	10/05/2018 02:00:00	0	8.16	93.6	0.843	57.02	19.2	1001.04
1684	10/05/2018 03:00:00	0	8.08	93.4	1.149	69.33	16.41	1000.89
1685	10/05/2018 04:00:00	0	7.674	93.9	0.909	54.14	19.24	1000.42
1686	10/05/2018 05:00:00	0	7.377	94.6	0.631	44.85	22.5	999.895
1687	10/05/2018 06:00:00	0	7.346	94.3	0.563	62.27	15.82	999.874
1688	10/05/2018 07:00:00	0	6.733	95.3	0.753	44.6	22.68	1000.17
1689	10/05/2018 08:00:00	8.89289	7.321	94.3	1.18	58.54	25.81	999.909
1690	10/05/2018 09:00:00	122.929	9.04	88.9	0.613	45.93	17.49	999.961
1691	10/05/2018 10:00:00	330.946	14.51	66.48	0.179	60.76	8.57	999.799
1692	10/05/2018 11:00:00	476.092	17.12	58.66	0.43	226.7	22.89	999.655
1693	10/05/2018 12:00:00	576.391	18.62	50.48	0.588	256.2	42.53	999.093
1694	10/05/2018 13:00:00	617.793	19.83	49.2	1.023	327.7	35.03	998.214
1695	10/05/2018 14:00:00	596	20.35	46.62	1.164	323.3	43.63	997.202
1696	10/05/2018 15:00:00	514.672	20.49	47.23	1.871	322.1	29.44	996.901
1697	10/05/2018 16:00:00	387.503	20.75	45.68	1.711	320.5	27.87	996.849
1698	10/05/2018 17:00:00	207.451	19.69	58.82	1.866	245.3	35.98	996.94
1699	10/05/2018 18:00:00	24.7134	16.58	67.7	1.587	238.6	29.07	997.119
1700	10/05/2018 19:00:00	0	14.45	75.12	0.578	294.5	52.47	997.255
1701	10/05/2018 20:00:00	0	12.5	83.9	1.213	75.64	13.51	997.551
1702	10/05/2018 21:00:00	0	11.01	87	0.692	62.22	18.69	997.534
1703	10/05/2018 22:00:00	0	10.39	89.3	1.196	66.54	22.88	997.417
1704	10/05/2018 23:00:00	0	10.27	90.5	1.005	70.55	21.84	996.883
1705	11/05/2018 00:00:00	0	9.8	92	0.613	66.81	13.91	996.563
1706	11/05/2018 01:00:00	0	9.82	92.4	0.705	79.12	16.86	996.065
1707	11/05/2018 02:00:00	0	9.51	93.2	0.379	79.24	13.07	995.69
1708	11/05/2018 03:00:00	0	9.13	93.8	0.715	69.88	24.99	995.272
1709	11/05/2018 04:00:00	0	9.32	93.4	1.266	62.27	26.64	994.626
1710	11/05/2018 05:00:00	0	9.07	94.2	0.435	48.68	15.62	994.375
1711	11/05/2018 06:00:00	0.0362448	8.79	94.5	0.521	56.72	16.31	995.397
1712	11/05/2018 07:00:00	0	9.33	94.2	1.078	57.1	26.31	995.719
1713	11/05/2018 08:00:00	5.39592	9.68	95.1	0.696	347.1	20.61	996.771
1714	11/05/2018 09:00:00	58.0534	10.16	93.9	0.788	69.58	34.25	997.697
1715	11/05/2018 10:00:00	150.099	12.36	91.9	0.098	107.1	8.96	998.378
1716	11/05/2018 11:00:00	216.263	14.45	85.4	1.672	331.9	21.87	998.579
1717	11/05/2018 12:00:00	376.023	14.72	77.2	1.713	6.46	32.35	998.706
1718	11/05/2018 13:00:00	567.135	16.62	68.42	2.495	5.433	36.21	998.214
1719	11/05/2018 14:00:00	513.615	17.36	63.45	2.446	1.837	33.87	997.694
1720	11/05/2018 15:00:00	130.011	16.77	63.94	2.1	351.1	30.79	997.79
1721	11/05/2018 16:00:00	170.043	17.11	63.59	1.457	356.5	35.72	997.95
1722	11/05/2018 17:00:00	39.7746	16.69	65.36	1.897	316.8	25.11	998.604
1723	11/05/2018 18:00:00	7.53951	15.68	74.42	2.004	327.3	29.49	999.336
1724	11/05/2018 19:00:00	0	14.69	80.9	1.79	351.7	34.77	1000.1
1725	11/05/2018 20:00:00	0	14.14	81	1.27	46.22	25.4	1000.81
1726	11/05/2018 21:00:00	0	13.64	92.8	2.304	357.8	35	1001.56
1727	11/05/2018 22:00:00	0	12.86	92.7	2.002	40.71	33.8	1001.93
1728	11/05/2018 23:00:00	0.0064194	13.39	88.1	1.786	53.96	20.96	1002.07
1729	12/05/2018 00:00:00	0.0109748	13.95	84.8	1.735	65.95	20.84	1002.16
1730	12/05/2018 01:00:00	0.0118034	14.31	82.1	1.707	42.82	27.11	1002.09
1731	12/05/2018 02:00:00	0	14.17	84.2	1.041	51.28	19.19	1002.32
1732	12/05/2018 03:00:00	0.00496982	13.96	85.5	1.186	53.44	18.64	1002.46
1733	12/05/2018 04:00:00	0.00579811	13.91	83.6	1.592	40.76	21.55	1002.46
1734	12/05/2018 05:00:00	0	13.83	84.8	1.37	32.79	19.49	1002.6
1735	12/05/2018 06:00:00	0	13.8	85.3	1.44	24.57	26.08	1002.68
1736	12/05/2018 07:00:00	0	13.36	87.3	1.412	13.88	28.57	1002.98
1737	12/05/2018 08:00:00	6.18104	13.45	87.4	1.78	29.29	27.83	1003.41
1738	12/05/2018 09:00:00	83.5247	14.06	82.4	1.916	45.56	24.39	1003.95
1739	12/05/2018 10:00:00	216.201	15.44	75.63	2.097	61.11	23.53	1004.29
1740	12/05/2018 11:00:00	471.704	17.28	69.02	2.422	65.6	26.19	1004.19
1741	12/05/2018 12:00:00	362.322	18.16	62.16	1.315	36.71	47.1	1003.83
1742	12/05/2018 13:00:00	517.625	19	65.25	1.928	326	40.55	1003.39
1743	12/05/2018 14:00:00	472.175	19.15	62	2.283	318.8	30.52	1002.86
1744	12/05/2018 15:00:00	575.382	20.26	57.38	1.487	288.4	46.29	1002.33
1745	12/05/2018 16:00:00	181.011	19.91	56.15	0.533	315	25.19	1002.03
1746	12/05/2018 17:00:00	145.084	19.77	60.55	0.613	203.1	38.22	1001.81
1747	12/05/2018 18:00:00	29.257	17.89	76.18	2.046	236.4	26.98	1002.07
1748	12/05/2018 19:00:00	0	15.89	84.9	1.173	256.4	45.73	1002.26
1749	12/05/2018 20:00:00	0	14.64	88.5	0.23	337	7.066	1002.47
1750	12/05/2018 21:00:00	0	12.93	91.7	0.292	80.5	10.73	1002.43
1751	12/05/2018 22:00:00	0	12.31	93.1	0.733	61.09	22.49	1002.44
1752	12/05/2018 23:00:00	0	11.95	94.2	0.677	82.5	14.9	1002.5
1753	13/05/2018 00:00:00	0	11.49	95.4	0.634	58.79	15.5	1002.29
1754	13/05/2018 01:00:00	0	11.35	95.2	1.901	78.93	14.18	1001.55
1755	13/05/2018 02:00:00	0	11.3	95.7	0.358	42.31	27.09	1000.95
1756	13/05/2018 03:00:00	0	10.55	96.5	0.456	71.04	15.11	1000.79
1757	13/05/2018 04:00:00	0	10.09	96.8	0.675	62.09	18.66	1000.42
1758	13/05/2018 05:00:00	0	9.87	97.4	0.455	50.77	17.8	999.985
1759	13/05/2018 06:00:00	0	9.83	97.7	0.34	53.44	18.32	1000.03
1760	13/05/2018 07:00:00	0	9.51	98	0.251	26.94	10.84	1000.11
1761	13/05/2018 08:00:00	6.78275	9.56	98.3	0.357	57.63	12.99	1000.27
1762	13/05/2018 09:00:00	78.9542	10.6	96.4	0.269	61.13	9.54	1000.63
1763	13/05/2018 10:00:00	260.104	13.34	90.6	0.291	57.78	15.09	1001.06
1764	13/05/2018 11:00:00	444.9	17.41	72.87	0.407	226.8	51.29	1001
1765	13/05/2018 12:00:00	599.152	17.63	73.61	1.731	236.9	31.45	1001.23
1766	13/05/2018 13:00:00	598.466	18.12	70.42	2.156	233.6	33.29	1001.18
1767	13/05/2018 14:00:00	592.335	19.08	64.52	1.745	240.7	34.62	1000.66
1768	13/05/2018 15:00:00	493.741	19.58	65.38	1.982	244.8	32.83	1000.2
1769	13/05/2018 16:00:00	362.094	18.75	68.55	2.478	241.2	32.04	1000.22
1770	13/05/2018 17:00:00	205.117	18.83	73.02	1.889	239.3	29.84	1000.32
1771	13/05/2018 18:00:00	44.568	17.44	78.1	0.734	252.9	22.89	1000.71
1772	13/05/2018 19:00:00	0	15.58	85.5	0.516	220.5	44.14	1001.39
1773	13/05/2018 20:00:00	0	14.35	88.4	0.206	221.9	32.63	1002.22
1774	13/05/2018 21:00:00	0	12.94	91.8	0.778	68.42	17	1002.74
1775	13/05/2018 22:00:00	0	11.97	93.2	0.303	60.76	15.6	1003.35
1776	13/05/2018 23:00:00	0	11.58	94.1	0.845	71.7	20.97	1003.54
1777	14/05/2018 00:00:00	0	11.35	94.4	0.704	74.43	18.82	1003.62
1778	14/05/2018 01:00:00	0	10.65	95.4	0.921	65.67	18.41	1003.88
1779	14/05/2018 02:00:00	0	10.58	95.9	0.705	60.28	23.1	1004.3
1780	14/05/2018 03:00:00	0	10.26	96.3	0.913	68.88	19.14	1004.32
1781	14/05/2018 04:00:00	0	9.82	96.9	0.387	47.59	19.17	1004.17
1782	14/05/2018 05:00:00	0	9.37	97.2	0.626	72.59	11.77	1004.32
1783	14/05/2018 06:00:00	0	9.5	97.1	1.262	72.79	13.63	1004.45
1784	14/05/2018 07:00:00	0	9.24	97.6	0.373	29.77	22.92	1004.57
1785	14/05/2018 08:00:00	5.75256	9.04	97.8	0.383	66.34	24.89	1005.18
1786	14/05/2018 09:00:00	107.905	10.68	94.4	0.598	65.87	14.44	1005.76
1787	14/05/2018 10:00:00	301.575	14.68	80	0.289	18.17	27.26	1006.11
1788	14/05/2018 11:00:00	449.713	18.54	66.94	0.034	339.7	11.94	1006.21
1789	14/05/2018 12:00:00	543.23	19.78	63.61	0.705	255.4	32.52	1006.21
1790	14/05/2018 13:00:00	583.717	21.15	51.47	0.555	234.7	48.22	1005.93
1791	14/05/2018 14:00:00	564.907	21.92	49.05	1.192	217.5	43.94	1005.36
1792	14/05/2018 15:00:00	487.494	21.71	56.52	2.062	243.8	34.76	1005.12
1793	14/05/2018 16:00:00	359.796	20.6	59.46	2.499	232.6	33.59	1005.41
1794	14/05/2018 17:00:00	194.962	19.75	70.64	2.148	244	27.67	1005.64
1795	14/05/2018 18:00:00	37.3815	18.26	75.72	0.694	256.3	23.47	1006.13
1796	14/05/2018 19:00:00	0	16.4	82.2	0.144	279.9	27.46	1006.53
1797	14/05/2018 20:00:00	0	14.16	87.1	1.083	74.68	14.46	1007.17
1798	14/05/2018 21:00:00	0	13.02	90.8	0.568	50.31	17.48	1007.32
1799	14/05/2018 22:00:00	0	12.12	92.7	0.19	43.85	14	1007.62
1800	14/05/2018 23:00:00	0	11.46	94.6	0.392	41.32	16.32	1007.71
1801	15/05/2018 00:00:00	0	11.21	94.9	0.36	59.38	17.61	1007.55
1802	15/05/2018 01:00:00	0	10.71	95.4	0.607	44.72	24.96	1007.3
1803	15/05/2018 02:00:00	0	10.23	96.2	0.237	39.29	10.81	1007.1
1804	15/05/2018 03:00:00	0	9.7	95.8	0.578	58.51	12.49	1006.91
1805	15/05/2018 04:00:00	0	9.44	95.3	0.646	68.09	11.4	1006.53
1806	15/05/2018 05:00:00	0	9.17	95.3	0.354	57.48	11.84	1006.14
1807	15/05/2018 06:00:00	0	9.15	95.4	0.59	43.06	19.99	1006.02
1808	15/05/2018 07:00:00	0	9.08	95.5	0.88	50.73	19.45	1006.32
1809	15/05/2018 08:00:00	5.4974	9.25	95	0.436	31.53	8.15	1006.68
1810	15/05/2018 09:00:00	126.799	10.89	88.4	0.32	22.09	7.294	1007.1
1811	15/05/2018 10:00:00	303.153	16.75	66.75	0.099	70.11	9.33	1007.3
1812	15/05/2018 11:00:00	448.412	21.4	46.13	0.047	89.6	20.26	1007.08
1813	15/05/2018 12:00:00	542.842	23.39	46.05	0.431	234.3	19.57	1006.81
1814	15/05/2018 13:00:00	585.759	23.48	41.31	1.292	236.3	29.36	1006.17
1815	15/05/2018 14:00:00	561.276	24.35	41.88	1.436	219.8	28.81	1005.47
1816	15/05/2018 15:00:00	480.456	24.35	48	1.677	219.8	27.15	1004.9
1817	15/05/2018 16:00:00	348.989	23.97	51.58	1.885	227.5	30.64	1004.69
1818	15/05/2018 17:00:00	187.195	22.24	54.14	1.658	239.2	31.15	1004.71
1819	15/05/2018 18:00:00	33.4248	19.95	61.52	0.416	262.3	13.38	1004.98
1820	15/05/2018 19:00:00	0	17.17	75.25	0.114	65.21	4.862	1005.38
1821	15/05/2018 20:00:00	0	14.74	79.45	1.112	75.75	13.57	1005.62
1822	15/05/2018 21:00:00	0	13.49	83.1	1.248	67.96	16.38	1005.62
1823	15/05/2018 22:00:00	0	12.94	85.8	1.523	69.26	18.05	1005.5
1824	15/05/2018 23:00:00	0	11.92	87.6	1.151	57.95	23.15	1005.32
1825	16/05/2018 00:00:00	0	12.03	86	1.49	69.05	16.92	1004.76
1826	16/05/2018 01:00:00	0	11.32	84.9	0.948	66.23	17.8	1004.14
1827	16/05/2018 02:00:00	0	11.11	88	0.769	31.34	23.15	1003.71
1828	16/05/2018 03:00:00	0	11.03	87.4	0.48	20.47	20.77	1003.27
1829	16/05/2018 04:00:00	0	10.41	87.8	0.302	25.12	9.58	1003.18
1830	16/05/2018 05:00:00	0	10.15	87.8	0.634	48.54	13.98	1002.85
1831	16/05/2018 06:00:00	0	10.71	82.8	1.167	38.28	14.3	1002.45
1832	16/05/2018 07:00:00	0	11	81.6	1.213	27.94	15.64	1002.49
1833	16/05/2018 08:00:00	5.26523	11.52	78.56	1.271	39.02	12.75	1002.5
1834	16/05/2018 09:00:00	131.355	13.56	68.68	0.852	38.56	15.42	1002.62
1835	16/05/2018 10:00:00	305.072	19.66	46.79	0.805	79.88	16.26	1002.84
1836	16/05/2018 11:00:00	444.342	24.41	42.84	0.203	21.67	41.9	1002.72
1837	16/05/2018 12:00:00	540.289	26.67	29.34	1.224	320.7	23.68	1002.25
1838	16/05/2018 13:00:00	589.284	26.98	27.42	2.446	2.995	41.36	1001.41
1839	16/05/2018 14:00:00	569.002	27.56	24.97	2.397	65.92	36.11	1000.29
1840	16/05/2018 15:00:00	489.482	27.89	24.2	2.23	23.7	37.22	999.732
1841	16/05/2018 16:00:00	355.582	27.99	24.53	2.034	31.52	29.81	999.489
1842	16/05/2018 17:00:00	188.66	27.4	28.32	1.719	40.66	22.65	999.368
1843	16/05/2018 18:00:00	33.8907	24.74	39.2	1.326	59.37	18.9	999.154
1844	16/05/2018 19:00:00	0	19.73	59.45	1.003	191.6	23.81	999.388
1845	16/05/2018 20:00:00	0	17.08	68.35	0.735	66.49	14.19	1000
1846	16/05/2018 21:00:00	0	15.12	68.74	0.882	75.52	10.49	1000.31
1847	16/05/2018 22:00:00	0	14.5	71.18	1.454	67	16.16	1000.36
1848	16/05/2018 23:00:00	0	13.29	71.79	0.545	58.93	27.43	1000.38
1849	17/05/2018 00:00:00	0	12.94	72.36	1.071	77.02	20.09	1000.55
1850	17/05/2018 01:00:00	0	12.02	76.39	0.478	56.59	21.9	1000.39
1851	17/05/2018 02:00:00	0	11.18	79.35	0.927	65.22	28.27	1000.55
1852	17/05/2018 03:00:00	0	11	84.6	0.685	44.33	25.74	1000.33
1853	17/05/2018 04:00:00	0	10.35	87.1	0.181	63.64	9.05	1000.29
1854	17/05/2018 05:00:00	0	10.19	86	0.226	50.26	8.72	1000.21
1855	17/05/2018 06:00:00	0	10.05	86.2	0.51	60.78	15.17	1000.47
1856	17/05/2018 07:00:00	0	9.97	86.4	0.694	48.78	15.83	1000.82
1857	17/05/2018 08:00:00	5.35905	9.67	89.5	0.282	32.73	10.41	1001.24
1858	17/05/2018 09:00:00	125.26	11.77	82.6	0.581	5.706	23.49	1001.54
1859	17/05/2018 10:00:00	298.648	16.26	64.51	0.789	52.01	62.19	1001.77
1860	17/05/2018 11:00:00	438.633	20.82	45.99	0.26	319.5	13.11	1002.14
1861	17/05/2018 12:00:00	535.521	23.05	44.42	0.746	224.9	22.17	1002.04
1862	17/05/2018 13:00:00	576.871	24.62	40.09	1.365	226.3	30.95	1001.75
1863	17/05/2018 14:00:00	551.055	25.64	39.4	1.999	226.6	30.77	1001.05
1864	17/05/2018 15:00:00	472.319	26.16	36.7	1.649	235.6	27.6	1000.7
1865	17/05/2018 16:00:00	340.463	26.71	37.27	1.53	220.4	25.05	1000.17
1866	17/05/2018 17:00:00	179.746	25.91	42.33	2.046	214	23.01	1000.28
1867	17/05/2018 18:00:00	32.1151	24.25	44.39	1.588	165.6	38.38	1000.68
1868	17/05/2018 19:00:00	0	22.72	50.4	3.088	119.4	27.92	1000.93
1869	17/05/2018 20:00:00	0	21.78	57.22	3.314	113.6	28.5	1001.33
1870	17/05/2018 21:00:00	0	21.31	52.84	3.412	123.5	28.01	1001.51
1871	17/05/2018 22:00:00	0	21.82	49.36	2.866	116.2	29.58	1001.45
1872	17/05/2018 23:00:00	0	22.04	46.42	2.869	122.5	33.23	1001.39
1873	18/05/2018 00:00:00	0	22.12	44.32	2.909	123.7	35.08	1001.25
1874	18/05/2018 01:00:00	0	21.2	41.47	2.08	136.5	37.92	1001.3
1875	18/05/2018 02:00:00	0	22.87	35.38	2.513	100.5	23.49	1000.74
1876	18/05/2018 03:00:00	0	22.7	46.89	2.069	108.4	39.1	1000.58
1877	18/05/2018 04:00:00	0	18.28	51.79	0.454	283.1	48.54	1000.84
1878	18/05/2018 05:00:00	0.0178056	16.59	81.2	0.417	255.9	53.32	1000.9
1879	18/05/2018 06:00:00	0	14.29	84.2	0.586	324.8	25.59	1001.03
1880	18/05/2018 07:00:00	0	13.98	85.8	0.468	344.2	21.56	1001.38
1881	18/05/2018 08:00:00	12.0805	13.65	80.3	0.38	21.5	19.1	1001.87
1882	18/05/2018 09:00:00	129.236	15.99	67.77	0.019	29.27	3.898	1002.17
1883	18/05/2018 10:00:00	177.11	18.93	56.41	0.188	316.8	15.44	1002.3
1884	18/05/2018 11:00:00	174.373	20.48	59.08	0	0	0	1002.26
1885	18/05/2018 12:00:00	337.065	22.99	48.47	0	0	0	1002.14
1886	18/05/2018 13:00:00	597.526	26.28	32.38	0.289	223.1	11.25	1001.77
1887	18/05/2018 14:00:00	527.044	27.47	32.91	1.314	227.7	27.7	1001.14
1888	18/05/2018 15:00:00	424.07	28.13	28.91	1.427	221.3	26.88	1000.79
1889	18/05/2018 16:00:00	323.198	28.17	35.08	1.32	225.7	29.23	1000.64
1890	18/05/2018 17:00:00	100.917	24.34	51.71	1.22	217.8	21.72	1000.73
1891	18/05/2018 18:00:00	18.3931	21.67	62.2	0.002	319.3	4.229	1000.98
1892	18/05/2018 19:00:00	0	19.32	70.4	0	0	0	1000.87
1893	18/05/2018 20:00:00	0	16.91	68.4	0.24	75.25	4.37	1001.24
1894	18/05/2018 21:00:00	0	16.14	66.96	0.079	71.79	3.447	1001.07
1895	18/05/2018 22:00:00	0	16.02	59.68	0.604	72.6	10.79	1000.39
1896	18/05/2018 23:00:00	0	16.25	60.46	0.247	72.72	14.8	1000.26
1897	19/05/2018 00:00:00	0	16.21	61.85	0.228	16.23	21.84	1000.17
1898	19/05/2018 01:00:00	0	16.55	61.55	0	0	0	1000.03
1899	19/05/2018 02:00:00	0	16.73	64.25	0	0	0	999.922
1900	19/05/2018 03:00:00	0	16.23	67.48	0	0	0	999.898
1901	19/05/2018 04:00:00	0	14.84	67.75	0	0	0	999.779
1902	19/05/2018 05:00:00	0	15.9	62.61	1.249	336.5	14.37	999.814
1903	19/05/2018 06:00:00	0	15	65.75	0.213	32.66	18.73	999.624
1904	19/05/2018 07:00:00	0.00289909	15.29	67.02	1.935	347.9	20.61	999.68
1905	19/05/2018 08:00:00	3.75034	14.15	69.05	1.063	36.54	36.57	999.446
1906	19/05/2018 09:00:00	100.775	14.65	62.89	0.739	352.6	21.22	998.918
1907	19/05/2018 10:00:00	183.263	17.51	60.06	0.282	331.3	8.74	998.79
1908	19/05/2018 11:00:00	348.952	21.12	48.69	0.483	330.3	15.75	998.605
1909	19/05/2018 12:00:00	313.304	23.27	42.07	0	0	0	998.386
1910	19/05/2018 13:00:00	292.846	24.7	41.25	0	0	0	998.197
1911	19/05/2018 14:00:00	200.473	24.12	46.93	1.261	216	21	998.071
1912	19/05/2018 15:00:00	181.716	22.66	56.9	1.23	231.5	25.24	997.71
1913	19/05/2018 16:00:00	83.1105	20.1	60.92	0.58	230	15.62	997.96
1914	19/05/2018 17:00:00	52.1794	20.06	64.73	0.035	216.1	3.438	997.986
1915	19/05/2018 18:00:00	5.42858	19.2	68.97	0.051	210.4	3.47	997.925
1916	19/05/2018 19:00:00	0	18.53	71.69	0	0	0	997.785
1917	19/05/2018 20:00:00	0	18.05	73.16	0	0	0	998.242
1918	19/05/2018 21:00:00	0	17.68	75.71	0	0	0	998.718
1919	19/05/2018 22:00:00	0.00455497	17.46	68.71	0.596	345.1	20.31	999.524
1920	19/05/2018 23:00:00	0.0144931	18.89	62.62	1.861	33.02	26.03	1000.21
1921	20/05/2018 00:00:00	0	18.46	65.52	1.188	43.42	19.95	999.101
1922	20/05/2018 01:00:00	0	18.11	69.44	1.127	50.22	24.72	998.377
1923	20/05/2018 02:00:00	0	17.34	73.8	0.128	35.14	6.489	997.717
1924	20/05/2018 03:00:00	0	16.59	76.93	0.804	343.2	16.05	997.357
1925	20/05/2018 04:00:00	0	16.11	81.6	1.811	348	47.52	998.241
1926	20/05/2018 05:00:00	0	15.72	82.9	0.352	61.53	15.96	998.307
1927	20/05/2018 06:00:00	0	15.6	82.1	0.854	52.11	20.91	998.177
1928	20/05/2018 07:00:00	0	14.99	86.6	1.187	341.4	19.3	998.576
1929	20/05/2018 08:00:00	2.26681	15.33	83.7	0.892	31	29.02	999
1930	20/05/2018 09:00:00	22.9824	16.08	82.4	1.515	34.06	23.01	999.028
1931	20/05/2018 10:00:00	25.6547	16.43	82.3	2.027	43.51	28.42	999.062
1932	20/05/2018 11:00:00	85.2809	16.99	77.88	2.204	47.23	25.31	999.401
1933	20/05/2018 12:00:00	147.522	17.94	76	2.035	25.27	33.49	999.353
1934	20/05/2018 13:00:00	147.113	16.46	92.9	2.41	353.8	39.67	999.246
1935	20/05/2018 14:00:00	593.045	18.73	77.05	2.624	15.76	41.8	998.401
1936	20/05/2018 15:00:00	217.208	18.38	80.1	2.345	4.028	34.06	998.25
1937	20/05/2018 16:00:00	77.5629	17.8	84.1	3.154	5.091	35.03	997.923
1938	20/05/2018 17:00:00	46.9352	17.41	86.3	2.605	2.531	36.26	998.393
1939	20/05/2018 18:00:00	3.93611	17.25	88.4	2.701	6.178	32.9	998.751
1940	20/05/2018 19:00:00	0	16.32	89.9	3.909	0.023	34.95	999.284
1941	20/05/2018 20:00:00	0	15.97	91.1	2.918	359.3	34.94	999.904
1942	20/05/2018 21:00:00	0	15.8	90.7	2.89	2.713	34.71	1000.18
1943	20/05/2018 22:00:00	0	15.71	92.5	2.993	1.433	34.76	1000.17
1944	20/05/2018 23:00:00	0	15.57	94.6	3.182	354.4	32.54	1000.07
1945	21/05/2018 00:00:00	0	15.38	96.6	3.333	357.9	31.33	1000.17
1946	21/05/2018 01:00:00	0	15.31	96.3	3.282	0.808	34.15	999.97
1947	21/05/2018 02:00:00	0	15.48	95.6	3.529	348.3	33.14	999.902
1948	21/05/2018 03:00:00	0	15.47	94.5	3.486	347.8	34.05	999.649
1949	21/05/2018 04:00:00	0	15.59	92.7	3.718	355.9	30.17	999.517
1950	21/05/2018 05:00:00	0	15.47	93.3	3.466	355.4	31.15	999.089
1951	21/05/2018 06:00:00	0	15.48	94	3.847	348.7	31.45	999.054
1952	21/05/2018 07:00:00	0	15.39	93.7	3.714	356.9	34.49	998.889
1953	21/05/2018 08:00:00	0.965555	15.46	93.7	4.063	358.9	34.79	998.822
1954	21/05/2018 09:00:00	18.7202	15.63	93.5	4.27	351.2	36.83	998.84
1955	21/05/2018 10:00:00	60.987	15.87	92.7	4.868	344.6	33.24	999.045
1956	21/05/2018 11:00:00	100.658	15.73	94.2	5.314	334.8	30.78	999.227
1957	21/05/2018 12:00:00	49.1165	15.6	94.3	4.288	338.2	33.72	998.902
1958	21/05/2018 13:00:00	58.7796	15.51	96.5	4.945	337.5	31.24	998.544
1959	21/05/2018 14:00:00	67.7635	14.1	97.1	3.624	296.5	23.04	998.786
1960	21/05/2018 15:00:00	87.9651	14.29	98	2.711	300.9	24.34	998.276
1961	21/05/2018 16:00:00	75.3962	15.54	98	4.226	319.1	24.13	998
1962	21/05/2018 17:00:00	136.242	15.65	94.7	4.29	331	24.45	998.259
1963	21/05/2018 18:00:00	17.434	15.88	92.7	3.992	332.7	23.12	998.59
1964	21/05/2018 19:00:00	0.0370652	15.6	93.9	3.853	338	28.12	999.094
1965	21/05/2018 20:00:00	0	15.53	93	4.264	338.3	26.83	999.36
1966	21/05/2018 21:00:00	0	15.18	95.2	4.615	341.7	29.65	999.52
1967	21/05/2018 22:00:00	0	14.7	97.7	4.456	322.5	26.73	999.861
1968	21/05/2018 23:00:00	0	14.67	98	3.703	316.9	23.85	1000.19
1969	22/05/2018 00:00:00	0.0434858	14.83	97.2	4.124	314.7	23.01	1000.48
1970	22/05/2018 01:00:00	0.00352024	14.8	95.5	3.754	306.2	23.9	1000.59
1971	22/05/2018 02:00:00	0	14.54	93.9	1.737	355.3	67.49	1000.93
1972	22/05/2018 03:00:00	0.165245	14.79	94.2	1.514	59.08	33.8	1001.6
1973	22/05/2018 04:00:00	0.102915	14.76	95.7	2.078	343.1	49.79	1001.67
1974	22/05/2018 05:00:00	0	14.11	93.8	1.982	317.7	22.96	1001.86
1975	22/05/2018 06:00:00	0.204998	14.4	91	2.798	310.6	20.49	1001.93
1976	22/05/2018 07:00:00	0	14.18	93.4	1.417	332.5	32.45	1002.75
1977	22/05/2018 08:00:00	3.92301	13.39	94.9	0.546	21.02	15.03	1003.65
1978	22/05/2018 09:00:00	75.1093	13.71	89.3	1.253	326.8	30.12	1004.36
1979	22/05/2018 10:00:00	259.803	15.94	78.51	2.559	332.6	23.26	1004.77
1980	22/05/2018 11:00:00	438.945	17.05	74.33	3.53	328.5	23.77	1005.02
1981	22/05/2018 12:00:00	368.416	17.34	68.4	2.969	330.7	28.82	1004.97
1982	22/05/2018 13:00:00	558.435	18.23	59.87	3.609	332.5	27.72	1004.54
1983	22/05/2018 14:00:00	551.168	18.72	55.87	3.533	325.6	26.31	1004.1
1984	22/05/2018 15:00:00	444.083	18.64	60.11	3.498	323.7	24.41	1003.6
1985	22/05/2018 16:00:00	307.693	18.62	61.39	3.018	327.2	27.9	1003.06
1986	22/05/2018 17:00:00	150.334	18.28	66.06	2.454	327.4	28.61	1003.15
1987	22/05/2018 18:00:00	26.9457	16.94	76	1.492	9	30.09	1003.2
1988	22/05/2018 19:00:00	0	16.33	81.2	2.281	5.501	32.58	1003.5
1989	22/05/2018 20:00:00	0	15.95	83.1	2.741	22.02	31.93	1003.88
1990	22/05/2018 21:00:00	0	15.23	86.4	1.848	35.26	30.37	1004.53
1991	22/05/2018 22:00:00	0	14.49	91.6	2.25	18.33	33.88	1005.22
1992	22/05/2018 23:00:00	0	14.04	90.3	3.501	358.2	32.26	1005.35
1993	23/05/2018 00:00:00	0	14.62	82.8	2.917	7.817	36.09	1005.72
1994	23/05/2018 01:00:00	0	15.01	82.9	3.61	22.42	33.12	1005.49
1995	23/05/2018 02:00:00	0	15.26	81.2	3.642	37.85	29.25	1005.06
1996	23/05/2018 03:00:00	0	15.16	82.6	3.158	40.26	28.09	1004.85
1997	23/05/2018 04:00:00	0	15.4	82.3	3.733	41.97	28.33	1004.7
1998	23/05/2018 05:00:00	0	15.43	83.6	3.697	42	28.1	1004.28
1999	23/05/2018 06:00:00	0	15.75	81.9	3.581	34.87	28.02	1004.02
[truncated: 16,048 more rows]
