# Supplementary material
Source: MDPI journal article supplement (https://www.mdpi.com/1999-4893/14/6/177)
Supplement: s1 [file s1 › UNVHour_data.xlsx]

## Sheet: UNV Hour
No	Date	GHI	Temp	RH	Rain	WS	WD	WD_StdDev	WS_Max	BP
1	01/03/2018 00:00:00	0	22.62	80	0	1.608	144.1	11.94	2.744	944
2	01/03/2018 01:00:00	0	22.34	78.73	0	1.553	151.1	11.79	2.94	944
3	01/03/2018 02:00:00	0	21.79	86.6	0	2.541	147	14.98	5.88	943
4	01/03/2018 03:00:00	0	20.63	90.7	0	1.372	144.2	35.7	4.606	943
5	01/03/2018 04:00:00	0	19.98	91.2	0	0.827	200.5	30.41	2.352	943
6	01/03/2018 05:00:00	0	19.86	90.8	0	0.783	200.2	28.67	2.254	943
7	01/03/2018 06:00:00	0.492015	19.81	94.2	0	0.838	121.1	23.12	2.254	944
8	01/03/2018 07:00:00	31.5757	19.77	93.4	0	0.879	125.3	24.21	2.156	944
9	01/03/2018 08:00:00	206.52	20.96	85	0	1.545	134.4	21.28	3.038	945
10	01/03/2018 09:00:00	402.268	22.14	79.34	0	2.02	127.8	20.61	4.214	945
11	01/03/2018 10:00:00	519.263	23.53	71.35	0	1.589	129.8	30.68	4.41	945
12	01/03/2018 11:00:00	861.152	25.37	66.07	0	1.86	157.5	33.6	4.214	945
13	01/03/2018 12:00:00	803.543	26.05	55.67	0	1.6	183.7	29.86	4.116	944
14	01/03/2018 13:00:00	955.054	27.5	52.93	0	1.84	163.2	41.99	4.9	943
15	01/03/2018 14:00:00	940.636	28.1	53.43	0	1.525	166.4	48.27	4.9	942
16	01/03/2018 15:00:00	842.788	28.58	49.01	0	2.249	156.3	38.04	6.174	941
17	01/03/2018 16:00:00	660.889	29.19	40.73	0	1.897	165.1	30.02	5.096	940
18	01/03/2018 17:00:00	425.565	29.28	40.19	0	2.736	149.6	22.81	6.37	940
19	01/03/2018 18:00:00	172.246	28.51	47.71	0	2.421	134.2	14.71	4.704	940
20	01/03/2018 19:00:00	9.17525	25.56	61.97	0	1.295	136.7	13.4	3.038	940
21	01/03/2018 20:00:00	0	23.71	66.61	0	1.157	149.4	12.03	1.862	941
22	01/03/2018 21:00:00	0	22.83	69.31	0	1.456	147	9.34	2.254	942
23	01/03/2018 22:00:00	0	22.26	69.96	0	1.628	141.8	10.06	2.352	943
24	01/03/2018 23:00:00	0	22.1	70.8	0	1.657	148.6	10.62	2.744	943
25	02/03/2018 00:00:00	0	21.75	73.97	0	1.602	135.7	13.23	2.548	943
26	02/03/2018 01:00:00	0	20.97	78.82	0	1.598	136.6	9.46	2.352	943
27	02/03/2018 02:00:00	0	20.46	79.23	0	1.488	152.2	12.35	3.332	943
28	02/03/2018 03:00:00	0	20.23	85.6	0	3.274	159.6	16.2	8.53	943
29	02/03/2018 04:00:00	0	19.93	88.4	0	3.725	161.4	15.04	6.958	943
30	02/03/2018 05:00:00	0	19.78	90.2	0	2.874	163.9	15.31	5.88	943
31	02/03/2018 06:00:00	0.253507	19.63	90.6	0	3.127	153.5	15.51	7.546	944
32	02/03/2018 07:00:00	33.1081	19.59	89.6	0	3.08	146.7	14.61	5.88	945
33	02/03/2018 08:00:00	143.879	20.15	82.9	0	3.155	153.7	14.42	5.88	945
34	02/03/2018 09:00:00	508.301	21.99	71.22	0	3.692	154	16.57	6.566	946
35	02/03/2018 10:00:00	465.383	22.68	67.58	0	3.384	162.8	20.08	6.86	946
36	02/03/2018 11:00:00	648.022	24.14	60.45	0	3.276	147.4	20.86	6.468	945
37	02/03/2018 12:00:00	718.746	24.55	63.18	0	3.808	160.1	27.98	7.154	945
38	02/03/2018 13:00:00	864.559	25.57	51.66	0	3.295	147.9	28.97	6.86	944
39	02/03/2018 14:00:00	722.338	26.52	54.82	0	3.04	145.9	26.18	7.056	943
40	02/03/2018 15:00:00	558.406	26.46	48.45	0	2.936	156.2	22.44	6.174	943
41	02/03/2018 16:00:00	508.459	27.05	45.58	0	3.073	159	20.55	7.252	943
42	02/03/2018 17:00:00	344.108	26.96	47.44	0	3.025	145.7	20.88	6.468	942
43	02/03/2018 18:00:00	121.414	25.87	51.36	0	2.376	157.6	20.07	5.586	942
44	02/03/2018 19:00:00	9.7369	23.91	63.01	0	1.356	153.4	14.38	3.626	942
45	02/03/2018 20:00:00	0	21.73	67.77	0	0.699	172.8	11.27	1.372	943
46	02/03/2018 21:00:00	0	21.72	66.71	0	1.082	158.9	13.28	2.058	944
47	02/03/2018 22:00:00	0	21.54	69.27	0	1.337	157.2	13.7	2.352	944
48	02/03/2018 23:00:00	0	21.26	73.3	0	1.572	151.7	14.98	3.038	944
49	03/03/2018 00:00:00	0	21.02	75.96	0	1.933	144.1	14.73	4.116	944
50	03/03/2018 01:00:00	0	20.52	83.5	0	1.863	137.7	15.31	3.332	945
51	03/03/2018 02:00:00	0	20.16	86.8	0	1.675	136	18.78	4.41	945
52	03/03/2018 03:00:00	0	20.07	88.1	0	1.536	190.3	30.85	4.214	945
53	03/03/2018 04:00:00	0	19.79	90.5	0	1.774	228	29.02	3.724	944
54	03/03/2018 05:00:00	0	19.57	92.1	0	1.302	206.8	13.34	2.94	945
55	03/03/2018 06:00:00	0.73427	19.44	91.8	0	0.932	194.2	30.03	2.156	944
56	03/03/2018 07:00:00	99.8044	19.97	81	0	0.846	220.7	24.37	1.96	945
57	03/03/2018 08:00:00	177.876	21.35	84.9	0	1.391	180.7	29.17	3.822	945
58	03/03/2018 09:00:00	231.849	21.79	81.8	0	1.722	158.5	28.31	3.43	945
59	03/03/2018 10:00:00	270.113	22.32	77.92	0	1.968	179.2	29.03	4.802	945
60	03/03/2018 11:00:00	278.398	22.86	79.85	0	1.702	204.1	31.57	3.92	945
61	03/03/2018 12:00:00	253.581	23.29	79.95	0	1.44	213.8	56.15	3.626	945
62	03/03/2018 13:00:00	203.714	22.56	79.24	0	1.925	232.8	21.72	3.92	944
63	03/03/2018 14:00:00	385.911	23.79	72.21	0	2.181	187.8	34.34	4.41	943
64	03/03/2018 15:00:00	429.48	25.21	66.78	0	1.642	182.4	29.79	3.528	943
65	03/03/2018 16:00:00	312.764	25.63	67.21	0	1.325	163.7	38.32	2.94	942
66	03/03/2018 17:00:00	200.218	25.43	66.75	0	1.131	117.2	16.47	2.548	942
67	03/03/2018 18:00:00	181.429	26.23	70.45	0	0.739	118.5	39.57	2.45	941
68	03/03/2018 19:00:00	4.46545	24.03	83.5	0	0.858	82.9	20.37	2.058	941
69	03/03/2018 20:00:00	0	22.43	86.7	0	0.384	33.21	30.23	1.078	942
70	03/03/2018 21:00:00	0	21.5	92.4	0	0.057	206.8	6.384	0.49	942
71	03/03/2018 22:00:00	0	21.15	88.8	0	0.6	198.2	27.31	1.764	943
72	03/03/2018 23:00:00	0	20.98	90.2	0	0.803	201.6	15.82	1.47	943
73	04/03/2018 00:00:00	0	21.18	87.4	0	1.321	202.9	8.37	1.862	943
74	04/03/2018 01:00:00	0	21.61	87.6	0	1.488	183.5	32.27	3.234	943
75	04/03/2018 02:00:00	0	21.67	91.4	0	1.085	115.7	19.2	2.744	943
76	04/03/2018 03:00:00	0	21.3	92.5	0	0.987	101.8	31.41	3.234	943
77	04/03/2018 04:00:00	0	21.38	92.2	0	1.387	129.4	15.24	2.94	943
78	04/03/2018 05:00:00	0	21.24	93.1	0	0.946	127.8	21.49	1.862	943
79	04/03/2018 06:00:00	0.525069	21.08	94.1	0	1.072	138.5	14.67	2.352	942
80	04/03/2018 07:00:00	32.9138	21.05	92.4	0	1.059	152.6	18.18	1.96	943
81	04/03/2018 08:00:00	94.8901	21.61	89.3	0	1.669	153.5	17.65	3.038	943
82	04/03/2018 09:00:00	185.875	22.37	83.3	0	1.836	143	17.14	3.724	944
83	04/03/2018 10:00:00	451.269	24.15	73.14	0	1.555	151.4	24.79	3.234	944
84	04/03/2018 11:00:00	405.866	25.37	69.89	0	1.017	189	41.46	2.744	943
85	04/03/2018 12:00:00	613.445	26.6	64.08	0	1.051	223.9	58.28	2.842	943
86	04/03/2018 13:00:00	883.488	28.29	58.85	0	1.389	165.3	56.46	3.626	942
87	04/03/2018 14:00:00	662.868	29.07	49.98	0	1.076	130.2	65.6	2.548	942
88	04/03/2018 15:00:00	613.37	29.46	45.19	0	1.159	217.3	50.09	3.626	941
89	04/03/2018 16:00:00	485.432	29.86	45.27	0	1.275	185.2	40.41	3.626	940
90	04/03/2018 17:00:00	350.963	29.81	44.06	0	1.482	156.8	30.74	3.626	940
91	04/03/2018 18:00:00	164.219	29.83	50.45	0	1.3	132.4	23.83	3.43	940
92	04/03/2018 19:00:00	7.41514	26.72	66.33	0	1.048	150.3	15.29	1.96	940
93	04/03/2018 20:00:00	0	24.64	69.95	0	1.211	184.1	8.73	1.666	940
94	04/03/2018 21:00:00	0	23.73	68.88	0	1.194	173.5	15.41	2.156	941
95	04/03/2018 22:00:00	0	24.05	68.27	0	1.523	152.7	11.85	2.45	942
96	04/03/2018 23:00:00	0	23.35	72.05	0	1.381	145.4	11.86	2.646	942
97	05/03/2018 00:00:00	0	22.3	76.55	0	0.819	160	15.04	1.568	942
98	05/03/2018 01:00:00	0	22.26	76.05	0	1.503	141.9	14.65	4.9	942
99	05/03/2018 02:00:00	0	21.89	86.5	0	1.007	101.8	45.31	3.528	942
100	05/03/2018 03:00:00	0	20.64	89.4	0	0.505	63.27	13.67	1.372	942
101	05/03/2018 04:00:00	0.240088	20.67	91.3	0	0.249	264.5	27.88	0.882	943
102	05/03/2018 05:00:00	0.105564	21.96	93.5	0	1.231	146.4	15.54	2.548	943
103	05/03/2018 06:00:00	0.503637	21.69	95.5	0	1.681	152.8	15.15	3.528	943
104	05/03/2018 07:00:00	43.54	21.79	92.8	0	1.971	170.1	16.64	4.9	944
105	05/03/2018 08:00:00	239.327	23.18	85.1	0	2.522	156.3	18.94	5.39	944
106	05/03/2018 09:00:00	358.632	24.27	79.07	0	2.859	160.8	20.56	5.782	945
107	05/03/2018 10:00:00	597.477	25.07	74.43	0	3.07	166.9	20.95	6.076	945
108	05/03/2018 11:00:00	664.551	26.12	65.83	0	2.518	171.1	25.76	5.292	944
109	05/03/2018 12:00:00	923.172	28.13	63.47	0	1.997	153.6	40.68	4.9	944
110	05/03/2018 13:00:00	495.698	28.18	56.4	0	1.35	202	44.75	3.234	943
111	05/03/2018 14:00:00	662.824	29.63	49.53	0	1.653	199.1	40.55	4.508	942
112	05/03/2018 15:00:00	554.634	30.01	48.92	0	1.252	156.2	37.96	3.626	942
113	05/03/2018 16:00:00	545.475	30.89	47.71	0	1.195	172	51.78	3.136	941
114	05/03/2018 17:00:00	250.181	30.22	43.22	0	0.824	226.6	36.09	2.156	941
115	05/03/2018 18:00:00	128.02	29.91	51.32	0	1.086	159.3	25.99	2.94	941
116	05/03/2018 19:00:00	4.67475	26.6	67.98	0	0.76	161.8	14.08	1.764	941
117	05/03/2018 20:00:00	0	24.34	69.14	0	1.15	180.9	9.03	1.96	941
118	05/03/2018 21:00:00	0	23.59	77.93	0	1.46	198	38.93	2.352	942
119	05/03/2018 22:00:00	0	21.86	81.2	0	1.083	260.7	10.88	1.666	943
120	05/03/2018 23:00:00	0	21.35	80.3	0	1.328	275.8	15.12	1.96	943
121	06/03/2018 00:00:00	0	21.4	79.06	0	1.325	268.5	10.83	2.352	943
122	06/03/2018 01:00:00	0	21.66	81.9	0	1.11	248.4	10.28	2.45	943
123	06/03/2018 02:00:00	0	21.19	76.58	0	1.071	246.2	65.46	4.116	943
124	06/03/2018 03:00:00	0	22.75	81.2	0	2.253	120	15.21	4.606	943
125	06/03/2018 04:00:00	0	21.64	88.4	0	1.031	106.4	16.04	2.842	944
126	06/03/2018 05:00:00	0	21.58	85.8	0	0.745	113.7	25.57	2.744	944
127	06/03/2018 06:00:00	0.05465	21.95	87.6	0	1.265	123.4	18.72	2.842	944
128	06/03/2018 07:00:00	16.4593	21.7	90.3	0	0.911	168	25.55	2.352	945
129	06/03/2018 08:00:00	59.7855	21.48	90.1	0	0.709	261.1	34.83	1.666	945
130	06/03/2018 09:00:00	146.623	22.25	86.7	0	0.821	307.3	59.84	2.45	945
131	06/03/2018 10:00:00	223.275	22.77	85.4	0	2.026	269.4	16.14	3.43	946
132	06/03/2018 11:00:00	783.039	25.2	67.27	0	1.471	277.9	32.44	3.724	945
133	06/03/2018 12:00:00	841.82	27.19	65.71	0	1.544	287.1	34.85	4.018	944
134	06/03/2018 13:00:00	784.502	28.4	55.36	0	1.376	242.4	62.9	3.724	944
135	06/03/2018 14:00:00	754.593	29.42	55.81	0	1.169	303.2	48.84	3.92	943
136	06/03/2018 15:00:00	829.509	30.4	51.22	0	1.245	285.6	74.02	3.92	942
137	06/03/2018 16:00:00	640.298	31.11	48.97	0	1.476	93.9	46.01	3.724	941
138	06/03/2018 17:00:00	405.101	31.62	48.52	0	1.335	77.05	34.41	2.94	941
139	06/03/2018 18:00:00	156.407	30.24	59.71	0	2.004	65.77	24.91	4.018	941
140	06/03/2018 19:00:00	5.64788	26.29	75.17	0	1.186	67.92	14.68	2.744	941
141	06/03/2018 20:00:00	0	24.4	76.34	0	0.538	91.4	22.42	1.764	941
142	06/03/2018 21:00:00	0	23.74	77.25	0	0.909	127.3	20.95	1.47	942
143	06/03/2018 22:00:00	0	22.98	80.4	0	0.919	140.1	14.24	1.764	943
144	06/03/2018 23:00:00	0	21.91	84.4	0	0.822	180.5	18.91	1.47	943
145	07/03/2018 00:00:00	0	21.7	82.3	0	0.875	238.2	32.91	1.764	943
146	07/03/2018 01:00:00	0	21.98	80.7	0	1.322	198.7	12.69	2.744	943
147	07/03/2018 02:00:00	0	20.84	90.8	0	0.504	263.1	64.72	1.47	943
148	07/03/2018 03:00:00	0	19.77	93.5	0	0.85	281.6	17.76	1.372	943
149	07/03/2018 04:00:00	0	19.51	93.7	0	0.682	272.5	28.04	1.568	943
150	07/03/2018 05:00:00	0	19.97	91.8	0	1.327	235.7	32.31	2.94	943
151	07/03/2018 06:00:00	0.49255	19.45	92.7	0	0.553	173	35.9	1.764	943
152	07/03/2018 07:00:00	42.6954	18.98	93.9	0	1.962	298.2	18.78	3.822	944
153	07/03/2018 08:00:00	118.958	20.95	86.6	0	1.387	263.4	16.68	2.45	944
154	07/03/2018 09:00:00	266.925	23.29	74.91	0	1.02	207.7	41.16	2.45	944
155	07/03/2018 10:00:00	443.637	24.7	71.73	0	1.513	245.6	35.92	3.038	944
156	07/03/2018 11:00:00	915.423	26.74	66.81	0	1.299	256.2	36.32	3.822	944
157	07/03/2018 12:00:00	1019.71	28.3	58.97	0	1.13	59.83	64.79	3.234	943
158	07/03/2018 13:00:00	1026.97	30.16	51.31	0	1.115	75.57	57.37	3.038	942
159	07/03/2018 14:00:00	964.806	31.51	45.23	0	1.584	100.2	40.63	3.528	941
160	07/03/2018 15:00:00	834.48	32.23	49.54	0	1.867	65.03	40.42	5.096	940
161	07/03/2018 16:00:00	636.252	32.34	48.18	0	2.338	60.21	26.3	5.194	940
162	07/03/2018 17:00:00	397.35	32.3	49.65	0	2.439	65.63	19.02	4.998	940
163	07/03/2018 18:00:00	147.03	30.64	53.16	0	2.462	80.7	15.98	4.41	939
164	07/03/2018 19:00:00	5.36253	27.64	62.1	0	1.799	95.1	14.75	3.332	939
165	07/03/2018 20:00:00	0	26.37	62.96	0	1.838	120.2	9.75	2.94	940
166	07/03/2018 21:00:00	0	25.38	69.45	0	1.5	95.7	13.18	2.744	940
167	07/03/2018 22:00:00	0	24.36	73.63	0	1.469	119.2	18	2.352	941
168	07/03/2018 23:00:00	0	23.74	74.93	0	1.72	129.2	9.07	3.038	941
169	08/03/2018 00:00:00	0	23.49	70.39	0	1.603	149.3	8.63	2.254	941
170	08/03/2018 01:00:00	0	23.28	73.05	0	1.405	121.6	8.72	2.548	941
171	08/03/2018 02:00:00	0	22.48	79.46	0	0.807	134.4	39.45	1.764	941
172	08/03/2018 03:00:00	0	20.81	88.6	0	1.454	287	9.7	2.842	940
173	08/03/2018 04:00:00	0	20.55	88.4	0	0.71	263.4	28.26	1.666	940
174	08/03/2018 05:00:00	0	20.18	90.4	0	0.775	282.2	16.99	1.568	940
175	08/03/2018 06:00:00	0.412692	19.68	92.1	0	0.75	271.8	18.15	1.862	940
176	08/03/2018 07:00:00	76.3786	21.27	79.12	0	1.165	286.4	21.55	3.038	940
177	08/03/2018 08:00:00	311.341	24.89	64.28	0	1.83	268.4	18.75	3.332	940
178	08/03/2018 09:00:00	548.509	28.05	53.11	0	1.11	272.8	23.99	2.254	941
179	08/03/2018 10:00:00	749.685	29.99	53.41	0	0.836	334	41.85	2.548	940
180	08/03/2018 11:00:00	900.567	30.96	48.48	0	1.327	60.37	41.96	3.626	940
181	08/03/2018 12:00:00	981.738	31.94	48.37	0	2.073	24.95	34.45	4.802	939
182	08/03/2018 13:00:00	991.943	32.89	42.34	0	1.957	16.12	27.62	4.606	938
183	08/03/2018 14:00:00	929.089	34.12	40.48	0	1.886	25.78	38.8	6.174	937
184	08/03/2018 15:00:00	801.645	34.72	41.63	0	2.216	1.377	33.42	4.998	936
185	08/03/2018 16:00:00	626.764	34.6	40.77	0	2.247	343.9	31.02	5.39	935
186	08/03/2018 17:00:00	359.038	34.64	43.42	0	1.973	349.9	28.5	4.214	935
187	08/03/2018 18:00:00	58.9276	32.13	53.22	0	0.941	18.26	14.61	2.744	935
188	08/03/2018 19:00:00	3.999	29.77	51.49	0	1.127	304.4	38.58	4.9	935
189	08/03/2018 20:00:00	0	28.5	57.62	0	1.275	254	18.94	3.038	935
190	08/03/2018 21:00:00	0	27.24	64.31	0	2.184	179.8	20.58	6.664	936
191	08/03/2018 22:00:00	0	26.22	67.2	0	1.542	284.7	51.97	5.684	937
192	08/03/2018 23:00:00	0	25.14	75.54	0	1.585	273.5	27.73	3.43	938
193	09/03/2018 00:00:00	0	23.81	77.75	0	1.427	292	9.6	2.548	938
194	09/03/2018 01:00:00	0	24.56	71.22	0	1.321	170.1	26.36	4.606	938
195	09/03/2018 02:00:00	0	24.18	83.9	0	2.055	144.5	20.04	6.076	938
196	09/03/2018 03:00:00	0	23.54	88.2	0	1.877	150.1	23.57	4.508	938
197	09/03/2018 04:00:00	0	22.59	89.3	0	2.65	159.4	20.64	5.096	938
198	09/03/2018 05:00:00	0	21.97	86.7	0	3.011	192.2	15.34	5.782	939
199	09/03/2018 06:00:00	0.225565	21.66	87.5	0	2.587	188.3	17.14	5.096	939
200	09/03/2018 07:00:00	21.4072	21.35	88.6	0	2.779	168.2	19.45	5.096	940
201	09/03/2018 08:00:00	37.3741	21.45	87.7	0	3.034	165.3	15.5	7.252	941
202	09/03/2018 09:00:00	64.0063	21.81	85.9	0	2.665	154.2	17.6	4.9	942
203	09/03/2018 10:00:00	62.6298	21.9	91.6	0	2.317	148.7	19.16	6.174	942
204	09/03/2018 11:00:00	110.328	22.33	80.6	0	2.382	157.4	16.97	5.096	942
205	09/03/2018 12:00:00	225.992	24.02	74.66	0	1.888	172.1	34.23	4.704	941
206	09/03/2018 13:00:00	285.18	25.3	71.2	0	2.002	150.7	27.83	4.312	941
207	09/03/2018 14:00:00	526.917	26.26	68.21	0	2.692	145.7	19.37	5.096	941
208	09/03/2018 15:00:00	609.428	27.14	60.47	0	2.908	139.4	21.13	5.39	940
209	09/03/2018 16:00:00	460.557	27.47	60.38	0	3.261	141.9	19.37	5.782	940
210	09/03/2018 17:00:00	397.913	27.64	59.81	0	3.934	137.3	19.65	6.664	940
211	09/03/2018 18:00:00	64.0301	25.75	63.58	0	3.604	126.9	13.6	6.762	940
212	09/03/2018 19:00:00	5.26183	24.63	64.9	0	3.125	130.4	12.92	5.292	940
213	09/03/2018 20:00:00	0	23.87	70.67	0	3.371	131.4	13.33	6.664	941
214	09/03/2018 21:00:00	0	23.17	73.98	0	3.239	129.7	12.11	6.37	943
215	09/03/2018 22:00:00	0	22.34	78.23	0	1.886	119.9	15.1	4.704	944
216	09/03/2018 23:00:00	0	22.03	77.61	0	1.606	126.2	19.82	4.018	944
217	10/03/2018 00:00:00	0	21.7	81.1	0	2.838	134.3	13.43	5.586	944
218	10/03/2018 01:00:00	0	21.25	82	0	2.085	144.7	17.22	4.606	944
219	10/03/2018 02:00:00	0	21.2	76.07	0	3.144	143.1	14.89	6.664	944
220	10/03/2018 03:00:00	0	20.82	80.7	0	3.522	134.8	14.72	6.664	944
221	10/03/2018 04:00:00	0	20.23	84.9	0	3.691	140.3	14.95	6.566	944
222	10/03/2018 05:00:00	0	19.57	87	0	3.015	128.9	13.24	5.684	944
223	10/03/2018 06:00:00	0.159717	19.61	88.8	0	1.715	109.8	24.83	4.116	944
224	10/03/2018 07:00:00	54.3505	19.38	87.5	0	0.942	132.7	26.65	2.352	945
225	10/03/2018 08:00:00	75.9263	20.49	86.7	0	1.686	81.9	19.09	3.92	946
226	10/03/2018 09:00:00	101.407	20.71	91.5	0	2.407	103.6	27.28	5.194	946
227	10/03/2018 10:00:00	185.718	20.18	86.1	0	3.473	124.2	15.79	6.174	946
228	10/03/2018 11:00:00	366.603	21.78	75.68	0	2.534	109.5	16.81	5.978	946
229	10/03/2018 12:00:00	450.102	23.46	65.2	0	2.366	128.1	18.76	4.214	945
230	10/03/2018 13:00:00	321.471	24.15	70.02	0	1.908	72.98	51.48	4.214	945
231	10/03/2018 14:00:00	568.84	25.68	69.05	0	1.607	51.89	63.74	3.528	944
232	10/03/2018 15:00:00	355.676	25.36	60.42	0	1.34	156.4	41.48	3.626	943
233	10/03/2018 16:00:00	454.191	26.71	57.38	0	1.646	105.7	34.05	3.724	943
234	10/03/2018 17:00:00	304.935	26.92	55.75	0	1.411	79.23	28.15	3.528	943
235	10/03/2018 18:00:00	118.106	26.13	67.4	0	1.358	123.5	30.95	2.842	942
236	10/03/2018 19:00:00	3.51408	23.21	75.83	0	1.23	197.7	11.13	2.058	943
237	10/03/2018 20:00:00	0	22.12	77.52	0	1.298	195.8	7.296	1.862	943
238	10/03/2018 21:00:00	0	20.78	87.8	0	1.121	271.1	36.78	2.352	944
239	10/03/2018 22:00:00	0	19.75	87.9	0	0.917	285.2	9.94	1.47	944
240	10/03/2018 23:00:00	0	19.41	88.3	0	0.981	282.7	13.23	2.058	944
241	11/03/2018 00:00:00	0	18.93	91.6	0	0.852	284.4	15.5	1.764	944
242	11/03/2018 01:00:00	0	18.58	90.7	0	1.345	257.6	20.58	2.548	944
243	11/03/2018 02:00:00	0	18.69	89.7	0	1.556	254	15.01	2.94	944
244	11/03/2018 03:00:00	0	18.55	92.5	0	0.938	215.6	20.68	1.862	943
245	11/03/2018 04:00:00	0	17.66	95.6	0	0.51	228.8	39.26	1.47	943
246	11/03/2018 05:00:00	0	16.94	97.1	0	0.232	289	22.67	1.47	944
247	11/03/2018 06:00:00	0.360824	16.79	97.7	0	1.617	294	10.64	2.646	944
248	11/03/2018 07:00:00	70.3396	18.53	84.7	0	1.17	289.6	13.42	2.254	945
249	11/03/2018 08:00:00	302.072	23.32	68.13	0	0.379	358.5	66.47	2.254	946
250	11/03/2018 09:00:00	548.691	25.17	63.59	0	1.371	121.6	29.09	3.234	946
251	11/03/2018 10:00:00	731.712	26.35	57.23	0	1.213	139.5	40.25	3.626	946
252	11/03/2018 11:00:00	903.603	27.57	55.18	0	1.306	94.1	43.13	3.234	945
253	11/03/2018 12:00:00	988.603	28.83	51	0	1.551	52.19	42.74	4.214	945
254	11/03/2018 13:00:00	996.146	29.86	46.94	0	1.648	101.7	53.16	5.782	944
255	11/03/2018 14:00:00	937.345	31.2	44.45	0	1.529	58.46	38.45	3.92	943
256	11/03/2018 15:00:00	801.915	32.01	42.04	0	1.304	102.7	63.87	3.822	942
257	11/03/2018 16:00:00	608.591	32.06	43.7	0	1.738	62.56	34.3	4.312	942
258	11/03/2018 17:00:00	370.419	32.09	40.12	0	2.008	59.63	27.31	4.312	942
259	11/03/2018 18:00:00	126.206	30.48	50.65	0	1.797	71.79	16.44	4.018	942
260	11/03/2018 19:00:00	2.5133	27.23	60.15	0	1.249	91	11.63	2.254	942
261	11/03/2018 20:00:00	0	25.58	68.74	0	1.102	101.6	20.07	2.156	943
262	11/03/2018 21:00:00	0	24.47	72.4	0	1.31	94.2	13.23	2.156	943
263	11/03/2018 22:00:00	0	23.46	76.66	0	1.105	120.3	16.8	2.058	943
264	11/03/2018 23:00:00	0	22.52	77.6	0	0.733	128.1	11.1	1.764	944
265	12/03/2018 00:00:00	0	22.55	74.05	0	0.837	149.5	13.53	1.568	944
266	12/03/2018 01:00:00	0	22.27	75.44	0	0.464	177.9	25.16	0.98	944
267	12/03/2018 02:00:00	0	22.04	80.7	0	0.638	247.1	46.46	1.176	944
268	12/03/2018 03:00:00	0	21.07	84.4	0	0.454	275.4	29.19	1.47	944
269	12/03/2018 04:00:00	0	20.35	87.3	0	0.705	244.1	30.93	1.764	944
270	12/03/2018 05:00:00	0	19.51	91.6	0	0.888	294	18.41	1.862	945
271	12/03/2018 06:00:00	0.278169	18.97	92.3	0	0.822	282.2	16.65	1.274	945
272	12/03/2018 07:00:00	69.4162	20.51	76.52	0	0.867	289.7	14.13	1.862	946
273	12/03/2018 08:00:00	294.2	24.37	69.7	0	1.33	286.5	14.6	3.43	947
274	12/03/2018 09:00:00	530.211	26.71	56.52	0	1.292	215.6	53.57	3.234	947
275	12/03/2018 10:00:00	736.631	28.84	49.01	0	1.421	87.2	33.9	3.626	948
276	12/03/2018 11:00:00	887.655	29.67	47.41	0	1.58	72.48	32.25	3.822	947
277	12/03/2018 12:00:00	976.069	30.09	45.97	0	1.949	135.6	40.43	4.9	947
278	12/03/2018 13:00:00	951.652	31.16	44.74	0	1.993	130.7	35.93	6.468	947
279	12/03/2018 14:00:00	912.071	32.33	42.02	0	2.494	104.4	33.49	5.586	946
280	12/03/2018 15:00:00	654.575	32.31	40.47	0	2.608	111.8	29.74	6.86	945
281	12/03/2018 16:00:00	476.165	32.13	40.46	0	2.838	125.9	23.13	6.566	945
282	12/03/2018 17:00:00	221.755	31.38	45.05	0	3.52	123.7	14.56	6.762	945
283	12/03/2018 18:00:00	91.3955	30.17	50.14	0	3.26	143.9	14.99	7.154	945
284	12/03/2018 19:00:00	2.47026	28.13	56.24	0	2.302	153.7	15.28	4.018	946
285	12/03/2018 20:00:00	0	27.2	57.92	0	2.782	150.1	15.08	6.468	947
286	12/03/2018 21:00:00	0	27.16	61.71	0	3.905	157.3	15.59	8.53	948
287	12/03/2018 22:00:00	0	25.55	72.77	0	5.481	151.6	16.09	11.07	949
288	12/03/2018 23:00:00	0	24.24	75.85	0	5.013	147.2	15.51	9.02	950
289	13/03/2018 00:00:00	0	23.39	78.87	0	4.209	145.6	15.45	9.11	950
290	13/03/2018 01:00:00	0	23.17	77.69	0	4.627	143.5	16.84	8.82	950
291	13/03/2018 02:00:00	0	22.55	79.01	0	4.034	130.7	15.14	7.35	949
292	13/03/2018 03:00:00	0	22.16	82.4	0	2.692	142.2	20.29	5.586	949
293	13/03/2018 04:00:00	0	21.5	84.8	0	1.427	150.7	20.72	3.038	949
294	13/03/2018 05:00:00	0	21.67	85.5	0	2.108	137.6	14.96	4.312	949
295	13/03/2018 06:00:00	0.128053	21.07	94.1	0	1.866	139.3	21.8	4.606	950
296	13/03/2018 07:00:00	41.2249	20.86	89.1	0	2.985	149.2	16.55	7.35	950
297	13/03/2018 08:00:00	184.347	21.69	84.6	0	3.449	164.4	16.81	7.448	951
298	13/03/2018 09:00:00	269.923	22.62	82.2	0	2.869	159.5	17.86	6.076	951
299	13/03/2018 10:00:00	328.015	23.29	78.71	0	2.92	166.1	20.56	5.586	951
300	13/03/2018 11:00:00	233.928	23.57	77.46	0	3.183	148.4	18.42	5.782	951
301	13/03/2018 12:00:00	400.233	24.7	65.41	0	2.354	162.8	19.68	5.292	951
302	13/03/2018 13:00:00	315.821	25.34	67.87	0	2.195	143.3	26.09	4.41	950
303	13/03/2018 14:00:00	297.102	25.72	66.47	0	1.65	100.9	39.31	3.724	949
304	13/03/2018 15:00:00	295.364	25.81	64.84	0	0.965	289.7	41.43	2.548	948
305	13/03/2018 16:00:00	637.987	28	55.23	0	0.953	294.2	62.46	2.842	947
306	13/03/2018 17:00:00	306.41	27.57	58.75	0	0.978	326	49.54	2.842	947
307	13/03/2018 18:00:00	115.859	26.31	71.08	0	1.425	313.7	19.65	2.842	947
308	13/03/2018 19:00:00	2.29208	23.3	83.5	0	1.042	311	10.51	2.254	947
309	13/03/2018 20:00:00	0	21.64	87.4	0	1.104	280.6	12.14	1.764	947
310	13/03/2018 21:00:00	0	20.68	87.3	0	1.481	277.2	10.5	2.254	947
311	13/03/2018 22:00:00	0	20.35	86	0	1.287	275.8	10.37	2.744	947
312	13/03/2018 23:00:00	0	19.9	88.3	0	1.288	261.6	17.22	2.45	947
313	14/03/2018 00:00:00	0	19.45	90.4	0	1.337	286.9	12.87	2.548	947
314	14/03/2018 01:00:00	0	19.41	90.7	0	1.932	266.2	13.09	3.038	947
315	14/03/2018 02:00:00	0	18.93	93.8	0	1.642	278.9	10.03	3.332	947
316	14/03/2018 03:00:00	0	19.6	92.1	0	1.313	209.1	50.42	2.352	946
317	14/03/2018 04:00:00	0	18.25	95.4	0	0.608	284.5	54.99	1.372	946
318	14/03/2018 05:00:00	0	17.21	95.6	0	0.735	262.5	21.88	1.274	946
319	14/03/2018 06:00:00	0.417627	18.15	93.7	0	0.844	258.4	10.78	1.372	946
320	14/03/2018 07:00:00	22.0627	18.98	92.7	0	1.071	296.2	16.09	2.94	947
321	14/03/2018 08:00:00	136.933	20.21	84.4	0	1.36	267.4	21.75	2.744	947
322	14/03/2018 09:00:00	310.729	22.21	81.3	0	1.374	317.1	22.95	2.646	947
323	14/03/2018 10:00:00	695.999	24.71	70.34	0	1.122	24	47.21	2.548	947
324	14/03/2018 11:00:00	890.073	26.99	61.94	0	0.954	15.9	49.85	2.94	946
325	14/03/2018 12:00:00	969.306	28.58	57.07	0	1.171	359.2	49.97	3.724	945
326	14/03/2018 13:00:00	980.519	30	50.92	0	1.164	59.15	51.34	3.136	944
327	14/03/2018 14:00:00	917.821	31.52	39.91	0	1.126	27.56	46.22	2.842	943
328	14/03/2018 15:00:00	783.48	32.62	33.23	0	1.457	61.56	53.4	3.528	942
329	14/03/2018 16:00:00	582.679	32.93	36.71	0	1.294	18.91	39.32	3.234	941
330	14/03/2018 17:00:00	333.086	32.87	36.79	0	1.618	47.21	24.3	3.724	941
331	14/03/2018 18:00:00	110.453	31.17	50.33	0	1.553	68.3	18.29	3.528	941
332	14/03/2018 19:00:00	1.55891	27.63	54.42	0	1.43	96.4	18.61	2.744	941
333	14/03/2018 20:00:00	0	26.12	60.03	0	1.149	107.6	13.99	2.352	941
334	14/03/2018 21:00:00	0	25.06	63.46	0	1.07	118.8	19.64	1.96	942
335	14/03/2018 22:00:00	0	24.45	67.94	0	1.399	122.6	13.46	2.352	942
336	14/03/2018 23:00:00	0	23.93	66.32	0	1.126	134.8	20.76	2.744	942
337	15/03/2018 00:00:00	0	23.04	73.37	0	1.107	184.4	41.96	2.352	941
338	15/03/2018 01:00:00	0	22.36	75.68	0	0.97	215.4	23.68	1.568	941
339	15/03/2018 02:00:00	0	21.21	83.2	0	0.755	297.6	34.82	1.568	941
340	15/03/2018 03:00:00	0	20.52	85.3	0	0.897	273.2	31.06	2.254	941
341	15/03/2018 04:00:00	0	20.23	84.7	0	0.851	258.8	39.97	2.254	941
342	15/03/2018 05:00:00	0	20.28	83.7	0	1.75	296.5	10.58	2.548	941
343	15/03/2018 06:00:00	0.142566	19.95	80.6	0	2.097	280.7	11.36	3.038	941
344	15/03/2018 07:00:00	62.2236	21.32	71.91	0	2.042	278.5	10.89	3.43	941
345	15/03/2018 08:00:00	274.596	24.77	60.67	0	1.823	278.3	14.05	4.214	942
346	15/03/2018 09:00:00	510.99	27.54	54.3	0	2.513	285.4	22.91	4.802	942
347	15/03/2018 10:00:00	716.372	30.1	47.49	0	3.407	294.4	19.11	6.86	942
348	15/03/2018 11:00:00	864.669	31.59	49.87	0	3.21	292	18.68	6.272	942
349	15/03/2018 12:00:00	938.971	32.83	39.96	0	1.676	265.7	43.78	4.802	941
350	15/03/2018 13:00:00	946.782	34.13	41.3	0	1.532	29.2	40.15	3.528	941
351	15/03/2018 14:00:00	886.139	35.06	34.51	0	1.387	64.27	55.89	4.018	940
352	15/03/2018 15:00:00	741.515	35.68	35.97	0	1.28	24.85	52.24	4.018	939
353	15/03/2018 16:00:00	563.605	35.3	40.34	0	2.247	43.84	27.63	5.684	938
354	15/03/2018 17:00:00	345.781	34.88	39.67	0	2.016	64.11	21.42	4.214	938
355	15/03/2018 18:00:00	104.202	33.13	46.56	0	1.692	91.1	14.93	3.626	938
356	15/03/2018 19:00:00	1.5736	29.93	60	0	1.093	93.6	20.3	2.058	938
357	15/03/2018 20:00:00	0	28.26	63.02	0	1.503	97.9	20.73	2.548	939
358	15/03/2018 21:00:00	0	27.08	62.72	0	1.715	119.4	11.45	3.038	939
359	15/03/2018 22:00:00	0	26.12	62	0	1.593	118.9	20.2	2.548	940
360	15/03/2018 23:00:00	0	25.8	60.36	0	2.11	117.1	13.82	3.528	940
361	16/03/2018 00:00:00	0	25.29	62.13	0	1.971	121	17.48	3.332	940
362	16/03/2018 01:00:00	0	24.67	64.28	0	1.794	107.8	15.27	3.136	940
363	16/03/2018 02:00:00	0	23.32	65.89	0	0.72	154.3	36.92	1.96	940
364	16/03/2018 03:00:00	0	23.4	67.96	0	1.165	159.8	18.32	2.156	940
365	16/03/2018 04:00:00	0	22.09	75.55	0	0.813	221.2	47.84	1.862	940
366	16/03/2018 05:00:00	0	21.08	88.8	0	0.885	280.2	20.44	1.96	941
367	16/03/2018 06:00:00	0.153285	20.81	83.4	0	1.307	255.7	15.73	2.744	941
368	16/03/2018 07:00:00	59.6259	21.61	77.04	0	1.878	276.6	19.36	3.136	941
369	16/03/2018 08:00:00	251.281	25.06	65.57	0	1.312	259.7	23.43	2.744	942
370	16/03/2018 09:00:00	487.567	27.18	54.69	0	1.412	276.8	23.4	2.744	943
371	16/03/2018 10:00:00	684.656	30.06	49.81	0	0.69	78.83	57.67	1.96	943
372	16/03/2018 11:00:00	830.14	31.16	47.67	0	1.222	59.34	76.23	3.136	943
373	16/03/2018 12:00:00	909.255	32.41	47.33	0	1.606	106.9	46.25	4.704	943
374	16/03/2018 13:00:00	871.438	33.3	40.08	0	1.891	108.8	33.92	5.684	942
375	16/03/2018 14:00:00	767.83	34.37	40.79	0	2.554	92.2	23.34	5.586	941
376	16/03/2018 15:00:00	652.743	33.91	42.57	0	2.971	58.98	21.91	5.586	941
377	16/03/2018 16:00:00	471.457	33.89	45.22	0	2.423	87.5	29.94	4.802	940
378	16/03/2018 17:00:00	141.791	32.11	48.88	0	1.963	82.2	25.27	6.468	940
379	16/03/2018 18:00:00	24.5463	28.44	74.76	0	4.579	206.8	30.05	12.35	941
380	16/03/2018 19:00:00	2.48055	24.36	79.69	0	5.392	161	23.46	12.45	941
381	16/03/2018 20:00:00	0	22.9	89.7	0	2.721	145.7	20.68	7.35	943
382	16/03/2018 21:00:00	0.0310739	22.01	88.7	0	1.383	126.2	65.12	4.9	944
383	16/03/2018 22:00:00	0.125373	22.4	90.3	0	2.733	149	31.62	6.076	945
384	16/03/2018 23:00:00	0	21.9	90	0	4.056	156.1	18.51	8.13	946
385	17/03/2018 00:00:00	0	21.23	90.8	0	3.037	144.3	18.95	7.056	946
386	17/03/2018 01:00:00	0	20.8	92.7	0	3.858	155	16.91	8.72	946
387	17/03/2018 02:00:00	0	20.14	88.9	0	4.618	160.3	18.41	10.49	946
388	17/03/2018 03:00:00	0	19.72	88.3	0	4.977	159	16.44	10.49	946
389	17/03/2018 04:00:00	0	19.48	88.4	0	3.779	152	21.22	8.72	946
390	17/03/2018 05:00:00	0	19.26	87.3	0	3.961	152.5	18.93	10.19	947
391	17/03/2018 06:00:00	0	18.5	90.2	0	3.813	155.1	19.8	10.49	947
392	17/03/2018 07:00:00	5.46629	18.75	87.8	0	2.771	147.3	25.97	8.43	948
393	17/03/2018 08:00:00	17.779	19	86.7	0	1.911	128.2	28.81	5.88	949
394	17/03/2018 09:00:00	55.4647	19.44	83.6	0	2.236	146.8	22.69	5.586	949
395	17/03/2018 10:00:00	99.5286	20	80	0	2.999	162.3	21.48	6.958	950
396	17/03/2018 11:00:00	162.708	20.4	77.93	0	2.874	166.9	20	6.86	950
397	17/03/2018 12:00:00	379.212	21.71	73.99	0	3.509	168.7	21.07	7.84	949
398	17/03/2018 13:00:00	448.847	22.76	71.23	0	3.618	180.5	20.08	7.742	948
399	17/03/2018 14:00:00	308.693	22.75	70.61	0	3.346	169.8	21.61	6.37	948
400	17/03/2018 15:00:00	237.815	22.68	72.34	0	3.233	160.4	19.66	6.272	947
401	17/03/2018 16:00:00	119.995	22.32	74.19	0	2.815	181.2	18.36	5.39	947
402	17/03/2018 17:00:00	79.5466	22.08	73.82	0	2.402	166.2	19.85	5.488	946
403	17/03/2018 18:00:00	24.2779	21.77	75.14	0	1.744	165.5	17.62	3.724	946
404	17/03/2018 19:00:00	0.485923	21.52	74.84	0	1.948	156.6	16.02	4.312	946
405	17/03/2018 20:00:00	0	21.42	72.12	0	2.884	167.1	18.2	6.958	947
406	17/03/2018 21:00:00	0	21.06	70.77	0	3.858	166.5	16.82	7.938	948
407	17/03/2018 22:00:00	0	20.74	69.78	0	4.164	161.1	16.39	8.82	948
408	17/03/2018 23:00:00	0	20.19	70.64	0	5.449	156.4	15.89	10.19	948
409	18/03/2018 00:00:00	0	19.67	68.54	0	3.95	160.1	18.33	8.04	948
410	18/03/2018 01:00:00	0	19.23	72.14	0	2.785	166.1	20.45	8.72	948
411	18/03/2018 02:00:00	0	18.82	75.58	0	2.145	157.8	19.99	4.508	948
412	18/03/2018 03:00:00	0	18.57	72.59	0	1.356	156.3	20.42	3.626	947
413	18/03/2018 04:00:00	0	18.44	70.75	0	2.03	178.6	20.71	4.214	947
414	18/03/2018 05:00:00	0	17.96	72.67	0	2.318	179.6	21.19	5.586	947
415	18/03/2018 06:00:00	0.0546683	17.51	73.16	0	1.193	188.6	27.21	3.136	947
416	18/03/2018 07:00:00	29.1273	17.57	72.15	0	0.818	222.6	31.4	2.548	948
417	18/03/2018 08:00:00	135.614	18.33	67.55	0	1.876	181.6	23.7	4.41	948
418	18/03/2018 09:00:00	282.163	19.56	64.86	0	2.639	179.9	23.39	5.096	948
419	18/03/2018 10:00:00	610.456	21.76	59.17	0	2.578	149.5	28.12	5.292	948
420	18/03/2018 11:00:00	841.536	23.17	60.95	0	2.494	148.9	29.21	5.488	947
421	18/03/2018 12:00:00	997.054	24.48	60.48	0	2.371	141.6	35.49	5.292	946
422	18/03/2018 13:00:00	543.355	24.52	58.31	0	2.277	196.9	29.48	4.9	945
423	18/03/2018 14:00:00	573.818	24.8	54.4	0	2.581	183.9	28.82	5.194	944
424	18/03/2018 15:00:00	558.968	25.54	50.51	0	1.691	169.9	38.93	4.018	944
425	18/03/2018 16:00:00	479.667	25.86	55.81	0	1.961	144.5	30.64	4.802	943
426	18/03/2018 17:00:00	329.721	25.83	52.45	0	2.145	145.4	27.01	3.92	943
427	18/03/2018 18:00:00	107.498	25.15	59.2	0	1.745	129.2	17.93	3.528	943
428	18/03/2018 19:00:00	1.07861	22.52	69.31	0	0.944	180.8	21.02	2.058	943
429	18/03/2018 20:00:00	0	21.15	74.5	0	0.932	177	21.36	1.47	943
430	18/03/2018 21:00:00	0	19.78	81.3	0	0.719	258.3	48.36	1.568	943
431	18/03/2018 22:00:00	0	18.89	85.6	0	0.917	276.4	19.73	1.666	944
432	18/03/2018 23:00:00	0	18.74	81.8	0	1.172	225.5	18.36	1.862	944
433	19/03/2018 00:00:00	0	18.15	87.7	0	0.824	262.8	35.79	1.47	944
434	19/03/2018 01:00:00	0	17.94	86	0	1.081	225	42.56	2.646	944
435	19/03/2018 02:00:00	0	17.25	91	0	0.338	281.7	26	0.98	943
436	19/03/2018 03:00:00	0	16.43	93.7	0	0.598	281.4	43.28	1.568	943
437	19/03/2018 04:00:00	0	16.63	91.8	0	1.071	191.3	30.51	2.254	943
438	19/03/2018 05:00:00	0	16.17	93.9	0	0.684	243.3	32.05	1.372	943
439	19/03/2018 06:00:00	0.123334	15.89	93.5	0	1.336	250	24.02	3.822	943
440	19/03/2018 07:00:00	64.5126	16.36	85.3	0	1.507	285.3	21.15	2.94	943
441	19/03/2018 08:00:00	289.082	19.93	73.76	0	2.087	278.2	13.96	3.234	944
442	19/03/2018 09:00:00	531.775	22.1	67.18	0	2.376	271.6	26.43	4.312	944
443	19/03/2018 10:00:00	738.531	24.69	58.16	0	2.253	301.6	22.9	6.468	944
444	19/03/2018 11:00:00	889.141	26.89	57.34	0	2.607	301.6	23.8	5.194	943
445	19/03/2018 12:00:00	966.002	28.61	51.79	0	2.518	316	27.02	6.174	942
446	19/03/2018 13:00:00	951.052	30.16	46	0	2.264	329.3	37.88	4.9	941
447	19/03/2018 14:00:00	916.781	31.34	42.82	0	2.443	338.4	36.83	5.684	941
448	19/03/2018 15:00:00	756.713	32.51	40.76	0	1.737	321.9	45.28	4.508	939
449	19/03/2018 16:00:00	577.688	32.56	42.26	0	1.535	324.9	43.2	4.312	939
450	19/03/2018 17:00:00	339.671	33.03	44.26	0	1.489	13.47	41.97	4.802	939
451	19/03/2018 18:00:00	113.114	31.33	54.63	0	1.815	36.92	19.91	3.136	939
452	19/03/2018 19:00:00	0.473598	27.39	62.18	0	1.197	46.06	62.5	4.214	939
453	19/03/2018 20:00:00	0	26.18	66.54	0	0.604	221	45.59	3.234	940
454	19/03/2018 21:00:00	0	24.97	70.11	0	0.658	141.9	17.97	1.176	940
455	19/03/2018 22:00:00	0	23.83	74.6	0	1.273	269.5	39.13	3.136	940
456	19/03/2018 23:00:00	0	23.19	73.29	0	0.945	268.1	20.1	2.548	940
457	20/03/2018 00:00:00	0	22.55	78.18	0	1.192	263.6	32.24	2.352	941
458	20/03/2018 01:00:00	0	21.3	85	0	1.765	298.9	11.98	3.038	941
459	20/03/2018 02:00:00	0	20.73	81.4	0	1.023	260.6	29.22	2.156	941
460	20/03/2018 03:00:00	0	20.21	84.7	0	1.34	284.1	26.43	2.45	941
461	20/03/2018 04:00:00	0	20.18	79.32	0	2.35	279.5	9.27	3.234	941
462	20/03/2018 05:00:00	0	20.52	82.6	0	1.524	278.3	26.57	3.038	941
463	20/03/2018 06:00:00	0.0300098	21.48	79.63	0	1.686	215.1	44.23	5.488	942
464	20/03/2018 07:00:00	58.3241	21.73	81.9	0	1.467	232.7	45.44	3.136	943
465	20/03/2018 08:00:00	195.244	22.35	83.6	0	3.02	231.3	17.95	6.174	945
466	20/03/2018 09:00:00	173.769	22.72	80.8	0	2.319	220.3	18.72	4.998	945
467	20/03/2018 10:00:00	234.867	23.75	78.39	0	1.626	218.6	23.98	3.234	945
468	20/03/2018 11:00:00	432.18	25.31	70.69	0	1.578	221.4	25.24	3.528	945
469	20/03/2018 12:00:00	599.791	26.88	65.86	0	1.693	243.8	36.44	4.312	945
470	20/03/2018 13:00:00	805.278	28.78	56.5	0	1.387	188.8	63.61	4.018	944
471	20/03/2018 14:00:00	739.909	29.31	57.31	0	2.268	147.1	26.98	4.312	943
472	20/03/2018 15:00:00	615.3	29.97	58.25	0	2.221	140.4	27.69	6.174	942
473	20/03/2018 16:00:00	496.462	29.99	53.92	0	2.154	143.7	33.27	4.9	942
474	20/03/2018 17:00:00	349.269	30.53	53.43	0	2.284	135.6	24.87	4.802	942
475	20/03/2018 18:00:00	79.5012	28.91	63.6	0	2.131	155.4	18.34	4.508	942
476	20/03/2018 19:00:00	0.837241	26.69	70.77	0	1.414	119.1	28.58	3.234	942
477	20/03/2018 20:00:00	0	25.41	74.96	0	0.866	166.3	29.12	1.764	942
478	20/03/2018 21:00:00	0	23.94	80.9	0	0.3	230.7	23.86	1.274	943
479	20/03/2018 22:00:00	0	23.32	84.9	0	0.995	268.2	41.27	1.862	943
480	20/03/2018 23:00:00	0	21.93	88.9	0	1.361	285.8	9.73	2.548	943
481	21/03/2018 00:00:00	0	21.91	87.5	0	1.061	236.3	22.64	1.96	944
482	21/03/2018 01:00:00	0.00750141	21.66	88.9	0	0.574	292.5	23.75	1.372	944
483	21/03/2018 02:00:00	0	21.33	91.4	0	0.678	259.6	57.48	1.862	944
484	21/03/2018 03:00:00	0	20.44	93.2	0	0.494	295.1	14.08	1.764	944
485	21/03/2018 04:00:00	0	20.13	92.8	0	0.909	256.5	27.39	1.96	944
486	21/03/2018 05:00:00	0	20.62	90.8	0	1.225	197.7	12.03	1.96	944
487	21/03/2018 06:00:00	0.043413	20.66	92.2	0	1.043	155.7	21.12	1.568	944
488	21/03/2018 07:00:00	58.6649	20.83	84	0	0.517	233.3	58.52	1.666	945
489	21/03/2018 08:00:00	253.625	23.83	74.68	0	1.162	105.2	23.52	2.94	945
490	21/03/2018 09:00:00	483.727	25.49	70.23	0	1.741	85.6	22.52	4.116	946
491	21/03/2018 10:00:00	699.086	27.5	66.2	0	0.947	61.98	63.6	3.332	946
492	21/03/2018 11:00:00	760.818	28.95	58.55	0	1.135	59.79	46.94	2.94	946
493	21/03/2018 12:00:00	840.927	30.18	54.78	0	1.501	63.18	40.64	4.312	945
494	21/03/2018 13:00:00	911.771	31.66	49.46	0	2.111	77.03	30.92	5.194	944
495	21/03/2018 14:00:00	811.25	32.21	47.51	0	2.058	67.31	35.15	4.9	943
496	21/03/2018 15:00:00	726.594	33.1	44.72	0	2.135	67.73	31.44	4.9	942
497	21/03/2018 16:00:00	539.813	33.07	43.6	0	2.367	69.96	25.95	5.978	941
498	21/03/2018 17:00:00	306.88	33.05	43.86	0	2.273	73.25	25.31	4.9	942
499	21/03/2018 18:00:00	86.4087	31.41	51.01	0	1.82	92.3	19.28	3.626	941
500	21/03/2018 19:00:00	0.54426	28.63	59.05	0	1.64	119.6	15.01	2.94	942
501	21/03/2018 20:00:00	0	26.2	68.23	0	0.862	105.7	37.49	1.862	942
502	21/03/2018 21:00:00	0	25.35	67.17	0	0.93	146	25.98	2.156	942
503	21/03/2018 22:00:00	0	24.83	71.27	0	0.962	163	13.25	1.862	943
504	21/03/2018 23:00:00	0	24.41	65.38	0	1.228	162.7	9.63	2.254	943
505	22/03/2018 00:00:00	0	24.57	79.09	0	1.56	152.2	49.57	2.646	944
506	22/03/2018 01:00:00	0	21.88	84.5	0	0.792	280.1	23.36	1.764	944
507	22/03/2018 02:00:00	0	21.72	83.9	0	0.998	235	23.45	2.058	944
508	22/03/2018 03:00:00	0.0241128	22.33	73.91	0	1.073	168.2	12.74	1.96	944
509	22/03/2018 04:00:00	0.0133959	23.33	80.6	0	2.017	169.2	19.85	6.174	945
510	22/03/2018 05:00:00	0	22.25	84.9	0	3.069	167.8	18.59	6.272	945
511	22/03/2018 06:00:00	0.0128588	21.48	87	0	1.791	194.4	40.85	7.742	946
512	22/03/2018 07:00:00	7.45062	21.49	87.6	0	1.413	162.2	33.49	3.626	947
513	22/03/2018 08:00:00	22.9541	21.69	87.8	0	2.232	135.6	17.07	4.41	947
514	22/03/2018 09:00:00	110.495	22.23	85.7	0	2.754	135.1	14.24	5.586	947
515	22/03/2018 10:00:00	150.685	22.83	84.4	0	2.955	141.7	17.25	5.586	947
516	22/03/2018 11:00:00	390.392	24.02	77.41	0	3.466	138	15.71	6.272	947
517	22/03/2018 12:00:00	414.301	24.5	81.1	0	3.817	152.6	18.09	7.154	947
518	22/03/2018 13:00:00	212.72	24.09	79.61	0	3.226	168.8	18.5	6.566	946
519	22/03/2018 14:00:00	568.204	25.12	74.01	0	3.946	167.8	18.19	7.252	945
520	22/03/2018 15:00:00	488.565	25.45	77.62	0	3.973	165.4	20.46	7.056	945
521	22/03/2018 16:00:00	257.085	23.87	82.4	0	4.15	176.9	17.05	8.13	945
522	22/03/2018 17:00:00	68.3961	22.28	85.6	0	3.732	177.9	18.41	7.84	945
523	22/03/2018 18:00:00	20.1341	21.57	86.7	0	3.243	172.8	20.79	6.86	945
524	22/03/2018 19:00:00	0.169292	20.86	86.9	0	2.768	177.6	18.77	5.88	945
525	22/03/2018 20:00:00	0	20.52	84.9	0	2.377	176.9	22.66	6.86	946
526	22/03/2018 21:00:00	0	20.41	85.4	0	2.964	167.3	20.17	7.056	946
527	22/03/2018 22:00:00	0	20.17	87.7	0	3.114	151.8	18.07	7.154	947
528	22/03/2018 23:00:00	0	19.76	91.4	0	2.159	154.3	19.44	4.802	947
529	23/03/2018 00:00:00	0	19.55	91.6	0	1.787	164.5	19.24	4.214	947
530	23/03/2018 01:00:00	0	19.43	91.1	0	2.561	143.9	18.21	6.86	946
531	23/03/2018 02:00:00	0	19.21	92.2	0	3.067	142	16.96	6.272	946
532	23/03/2018 03:00:00	0.00482367	18.56	96.1	0	2.21	143.3	16.2	5.488	946
533	23/03/2018 04:00:00	0	18.3	97.1	0	1.874	129.3	20.99	3.626	945
534	23/03/2018 05:00:00	0	17.88	97.9	0.508	1.196	163.2	26.2	3.822	945
535	23/03/2018 06:00:00	0.0616367	17.71	97.7	0	2.029	147.8	15.69	4.508	945
536	23/03/2018 07:00:00	11.7932	17.73	97.8	0	1.463	140.5	16.28	3.234	946
537	23/03/2018 08:00:00	41.6618	17.88	97.9	0	1.759	144.8	15.24	3.136	946
538	23/03/2018 09:00:00	81.6462	18.24	95.3	0	1.356	152.9	18.63	2.352	946
539	23/03/2018 10:00:00	170.992	18.56	92.4	0	2.124	143.7	17.54	4.018	946
540	23/03/2018 11:00:00	159.441	19	91.7	0	1.923	163.5	25.64	3.724	946
541	23/03/2018 12:00:00	195.616	18.99	89.2	0	1.713	175.3	20.5	4.018	945
542	23/03/2018 13:00:00	160.986	19.6	89.9	0	1.346	182.2	34.44	2.94	944
543	23/03/2018 14:00:00	97.5031	19.66	89.3	0	1.141	152.1	33.41	2.646	943
544	23/03/2018 15:00:00	205.943	19.98	88.7	0	2.06	137.7	15.76	4.214	943
545	23/03/2018 16:00:00	123.303	19.77	91.9	0	1.945	151.8	18.58	3.92	942
546	23/03/2018 17:00:00	50.8825	19.5	93.1	0	1.785	167.5	22.29	3.136	942
547	23/03/2018 18:00:00	9.47271	19.11	95.3	0	1.828	207.3	17.59	3.43	942
548	23/03/2018 19:00:00	0.026795	18.88	95.5	0	1.758	208.8	18.5	3.234	943
549	23/03/2018 20:00:00	0	18.97	95.6	0	1.06	209	29.6	2.156	943
550	23/03/2018 21:00:00	0	19.05	95.2	0	0.87	186.9	21.58	2.45	943
551	23/03/2018 22:00:00	0	19.02	96.7	0	1.199	181	25.03	2.646	943
552	23/03/2018 23:00:00	0	18.9	97.9	0	0.569	273.3	71.42	2.156	943
553	24/03/2018 00:00:00	0	18.83	98.5	0.254	0.771	336.4	38.43	2.548	943
554	24/03/2018 01:00:00	0	18.8	98.4	0	0.645	121.1	44.72	1.274	943
555	24/03/2018 02:00:00	0	18.82	98.5	0	0.647	115.7	19.82	1.764	942
556	24/03/2018 03:00:00	0.0637797	18.82	98.5	0	1.402	117.7	16.46	2.548	942
557	24/03/2018 04:00:00	0.0498446	18.84	98.4	0	0.535	133.4	19.45	1.862	942
558	24/03/2018 05:00:00	0.00482367	18.98	98.5	0	0.608	59.76	35.48	1.666	942
559	24/03/2018 06:00:00	0.0862901	18.96	98.2	0	0.392	139.3	16.04	1.862	942
560	24/03/2018 07:00:00	15.5274	19.05	98.1	0	0.406	211.1	47.81	1.764	942
561	24/03/2018 08:00:00	53.2732	19.26	98.2	0	1.796	240.7	19.3	3.43	943
562	24/03/2018 09:00:00	235.649	20.11	93.7	0	2.195	249.4	16.09	4.214	943
563	24/03/2018 10:00:00	232.898	20.95	89.2	0	1.692	262.8	22.63	2.842	943
564	24/03/2018 11:00:00	188.685	21.83	87.2	0	0.949	228.6	37.96	2.45	942
565	24/03/2018 12:00:00	489.929	23.45	76.66	0	1.253	50.23	28.94	3.92	942
566	24/03/2018 13:00:00	858.371	26.13	74.21	0	1.689	73.12	31.8	4.116	941
567	24/03/2018 14:00:00	880.299	27.54	71.51	0	1.838	75.79	27.06	4.312	940
568	24/03/2018 15:00:00	742.77	29.02	66.79	0	2.13	97.4	25.98	5.194	939
569	24/03/2018 16:00:00	541.091	29.77	65.84	0	1.881	97.1	26.83	3.528	939
570	24/03/2018 17:00:00	298.221	29.35	71.41	0	2.554	96.8	20.87	5.194	939
571	24/03/2018 18:00:00	76.0965	27.35	84.1	0	2.16	83.7	15.26	4.41	939
572	24/03/2018 19:00:00	0.260745	24.89	91.3	0	1.803	92.2	13.05	3.234	940
573	24/03/2018 20:00:00	0	23.8	93.1	0	1.623	103.5	14.47	2.842	941
574	24/03/2018 21:00:00	0	23.12	94.6	0	1.491	133.1	14.63	2.352	941
575	24/03/2018 22:00:00	0	22.48	96.2	0	1.205	176.3	47.15	2.058	941
576	24/03/2018 23:00:00	0	22.15	96.7	0	0.981	226.3	37.43	2.058	942
577	25/03/2018 00:00:00	0	21.66	98.1	0	0.77	217.9	29.87	1.764	942
578	25/03/2018 01:00:00	0	21.45	98.8	0	1.484	275.2	11.99	2.548	941
579	25/03/2018 02:00:00	0	21.45	99.3	0	0.962	287	38.34	2.842	941
580	25/03/2018 03:00:00	0	21.41	99.5	0	1.126	270.5	25.57	2.058	941
581	25/03/2018 04:00:00	0	21.32	99.8	0	1.837	284.8	11.38	3.038	941
582	25/03/2018 05:00:00	0	20.79	100	0	1.271	286.5	19.12	2.45	941
583	25/03/2018 06:00:00	0.198794	20.43	100	0	0.82	256.1	18.85	2.058	941
584	25/03/2018 07:00:00	53.6125	20.52	98.6	0	1.305	304.2	13.56	2.254	942
585	25/03/2018 08:00:00	266.657	22.78	84.6	0	0.987	290.2	23.45	2.254	943
586	25/03/2018 09:00:00	482.269	26.08	74.84	0	1.383	282.7	30.47	2.548	943
587	25/03/2018 10:00:00	682.407	28.45	66.27	0	1.111	281.2	52.43	2.744	943
588	25/03/2018 11:00:00	855.41	30.43	60.94	0	1.179	55.6	55.77	2.548	943
589	25/03/2018 12:00:00	883.715	31.06	56.66	0	1.646	278.2	30.63	4.41	942
590	25/03/2018 13:00:00	888.237	32.34	50.51	0	1.41	279.4	67.86	4.508	941
591	25/03/2018 14:00:00	911.17	33.71	48.6	0	1.285	181.8	44.42	3.332	940
592	25/03/2018 15:00:00	730.345	34.32	44.7	0	1.454	24.09	74.96	3.822	939
593	25/03/2018 16:00:00	407.983	33.96	50.24	0	1.48	104.2	44.04	3.626	939
594	25/03/2018 17:00:00	100.266	31.77	59.27	0	1.137	150.8	15.54	2.646	939
595	25/03/2018 18:00:00	11.5384	27.56	90.4	0	4.856	294	36.15	15.39	940
596	25/03/2018 19:00:00	0.547668	21.77	89.1	0	3.831	301.1	52.48	12.05	942
597	25/03/2018 20:00:00	0.0305396	22.13	88.8	0	1.35	299.8	28.99	3.626	943
598	25/03/2018 21:00:00	0.115194	22.09	93.9	0	1.398	340.3	29.29	3.038	943
599	25/03/2018 22:00:00	0.0878686	22.15	91.8	0	0.387	57.21	40.33	1.274	944
600	25/03/2018 23:00:00	0.0659014	22.34	93.3	0	0.711	82.6	24.92	2.156	944
601	26/03/2018 00:00:00	0	22.05	90.3	0	1.016	275	15.25	2.744	944
602	26/03/2018 01:00:00	0	21.9	87.7	0	1.883	287.3	10.93	3.528	943
603	26/03/2018 02:00:00	0	21.82	84.8	0	2.266	260.1	12.87	4.214	942
604	26/03/2018 03:00:00	0	22	87	0	1.826	270.2	14.7	3.626	942
605	26/03/2018 04:00:00	0	21.54	89.8	0	1.804	281.9	11.48	4.116	942
606	26/03/2018 05:00:00	0	21.19	92.5	0	1.456	295.7	17.29	2.744	943
607	26/03/2018 06:00:00	0.00589371	21.2	94	0	0.746	275.7	51.24	1.568	944
608	26/03/2018 07:00:00	18.8388	21.44	87.6	0	1.636	271.5	21.37	2.646	944
609	26/03/2018 08:00:00	126.325	22.78	81.1	0	1.764	236.8	19.4	3.234	945
610	26/03/2018 09:00:00	186.751	23.73	84.9	0	1.918	208.4	30.51	4.312	946
611	26/03/2018 10:00:00	192.628	23.64	85	0	3.19	160.3	18.09	8.13	947
612	26/03/2018 11:00:00	123.845	22.73	86.5	0	4.189	160.9	17.02	7.546	947
613	26/03/2018 12:00:00	127.492	22.16	87.7	0	3.719	162.7	15.63	7.154	947
614	26/03/2018 13:00:00	260.412	22.56	85.5	0	3.719	172.5	16.26	7.154	947
615	26/03/2018 14:00:00	256.983	22.45	85.5	0	3.446	168.5	17.6	7.252	947
616	26/03/2018 15:00:00	211.306	22.61	86.9	0	3.324	153.9	16.58	6.762	946
617	26/03/2018 16:00:00	117.561	22.52	84.4	0	2.142	154.4	19.48	4.802	946
618	26/03/2018 17:00:00	42.2636	22.55	86.7	0	2.026	174.6	19.55	4.312	946
619	26/03/2018 18:00:00	18.3731	22.24	88.6	0	1.881	168.6	19.52	4.116	946
620	26/03/2018 19:00:00	0.0471421	21.85	90.2	0	1.305	146	20.07	2.646	947
621	26/03/2018 20:00:00	0	21.74	91.2	0	1.395	137.3	17.89	2.45	948
622	26/03/2018 21:00:00	0	21.73	89.7	0	2.065	136.5	15.14	4.214	948
623	26/03/2018 22:00:00	0	21.52	91.6	0	1.364	127.3	19.21	3.038	949
624	26/03/2018 23:00:00	0	21.53	89.2	0	1.587	153.5	16.12	3.626	949
625	27/03/2018 00:00:00	0	21.55	88.1	0	2.026	164.6	19.51	4.802	949
626	27/03/2018 01:00:00	0	21.37	89.2	0	2.693	172.5	18.67	6.076	949
627	27/03/2018 02:00:00	0	21.1	88.9	0	2.565	175.4	17.37	5.39	949
628	27/03/2018 03:00:00	0	20.93	87.9	0	3.281	167.9	17.95	7.546	948
629	27/03/2018 04:00:00	0	20.74	89	0	1.845	167	20.79	4.9	948
630	27/03/2018 05:00:00	0	20.55	89.9	0	2.342	174.9	18.13	5.194	949
631	27/03/2018 06:00:00	0	20.3	90.9	0	2.456	181.3	14.58	4.998	949
632	27/03/2018 07:00:00	17.1841	20.27	89.8	0	2.215	179.1	18.36	4.508	950
633	27/03/2018 08:00:00	150.126	20.97	84.8	0	2.703	184.1	19.09	6.076	950
634	27/03/2018 09:00:00	153.29	21.6	81.2	0	2.596	206.6	19.54	5.684	951
635	27/03/2018 10:00:00	288.058	22.65	76.41	0	2.839	177.4	20.18	6.468	951
636	27/03/2018 11:00:00	349.336	23.41	74.43	0	3.085	152.7	19.82	5.782	951
637	27/03/2018 12:00:00	447.199	23.93	70.31	0	2.978	143.1	19.36	5.292	950
638	27/03/2018 13:00:00	382.62	24.7	67.34	0	2.405	142.9	21.94	4.606	949
639	27/03/2018 14:00:00	328.036	24.93	66.09	0	1.774	154.1	29.83	3.92	949
640	27/03/2018 15:00:00	481.674	26.65	60.82	0	1.469	168.3	39.49	4.998	948
641	27/03/2018 16:00:00	519.351	27.26	62.39	0	2.17	194.3	23.96	4.606	947
642	27/03/2018 17:00:00	254.853	26.89	60.91	0	2.028	191.8	27.43	4.116	947
643	27/03/2018 18:00:00	82.5769	25.95	71.05	0	1.606	212.1	20.63	3.136	947
644	27/03/2018 19:00:00	0.0979828	23.16	80.7	0	1.037	220.6	12.65	2.058	947
645	27/03/2018 20:00:00	0	22.02	83.5	0	1.073	211.3	10.79	1.862	947
646	27/03/2018 21:00:00	0	20.9	89.3	0	0.667	279.2	33.11	1.372	948
647	27/03/2018 22:00:00	0	20.79	87.9	0	1.631	287	6.007	2.548	948
648	27/03/2018 23:00:00	0	20.74	88.9	0	1.051	271.1	24.62	2.156	949
649	28/03/2018 00:00:00	0.0128631	21.41	82.9	0	1.017	186.9	22.07	2.744	949
650	28/03/2018 01:00:00	0	21.06	91.4	0	0.617	222.1	29.8	1.764	949
651	28/03/2018 02:00:00	0	19.92	93	0	0.693	272.6	51.67	1.372	948
652	28/03/2018 03:00:00	0.0407332	20.66	91	0	1.091	191.7	17.69	2.842	948
653	28/03/2018 04:00:00	0	20.86	92	0	1.264	139.4	23.91	2.548	948
654	28/03/2018 05:00:00	0.590443	20.68	91.9	0	1.339	142.4	14.1	3.038	948
655	28/03/2018 06:00:00	0.00857405	19.96	95.4	0	1.666	141.9	16.37	3.92	948
656	28/03/2018 07:00:00	27.0181	19.99	93	0	1.697	146.7	17.81	3.724	948
657	28/03/2018 08:00:00	88.0772	20.58	89.8	0	2.128	135.6	14.59	4.116	949
658	28/03/2018 09:00:00	103.166	20.58	90.3	0	2.245	111.1	15.53	4.214	949
659	28/03/2018 10:00:00	165.636	20.15	91.1	0	2.335	127.5	21.36	4.312	949
660	28/03/2018 11:00:00	585.593	22.88	74.09	0	2.09	162	25.54	4.018	949
661	28/03/2018 12:00:00	558.256	24.4	70.18	0	1.542	198.7	46.48	3.822	948
662	28/03/2018 13:00:00	733.032	25.74	57.79	0	1.27	229.6	36.73	3.332	947
663	28/03/2018 14:00:00	786.562	27.46	48.95	0	1.235	151.7	55.08	3.528	946
664	28/03/2018 15:00:00	487.942	27.93	55.3	0	1.149	129.5	43.24	3.234	945
665	28/03/2018 16:00:00	403.396	27.94	51.49	0	1.115	97.2	35.96	3.626	945
666	28/03/2018 17:00:00	279.183	28.24	50.89	0	0.785	68	48.89	3.332	944
667	28/03/2018 18:00:00	72.3029	26.44	70.23	0	0.857	77.19	19.21	2.548	944
668	28/03/2018 19:00:00	0	22.69	81.4	0	0.558	151.7	22.69	1.078	945
669	28/03/2018 20:00:00	0	20.53	86.8	0	0.472	181.5	8.58	1.274	945
670	28/03/2018 21:00:00	0	19.52	88.3	0	0.602	205.5	14.22	1.078	946
671	28/03/2018 22:00:00	0	19.19	90.9	0	1.207	264	35.11	2.548	946
672	28/03/2018 23:00:00	0	18.49	89.9	0	1.419	257.9	21.03	2.744	946
673	29/03/2018 00:00:00	0	18.15	92.6	0	1.819	287.7	12.74	2.94	946
674	29/03/2018 01:00:00	0	17.57	95	0	1.528	288.1	8.24	2.646	945
675	29/03/2018 02:00:00	0	17.31	93.7	0	1.502	297.7	9.57	2.548	945
676	29/03/2018 03:00:00	0	17.19	94.2	0	1.691	285.2	8.57	2.646	945
677	29/03/2018 04:00:00	0	17.17	93	0	2.117	282.9	11.42	3.43	945
678	29/03/2018 05:00:00	0	16.55	95.1	0	2.533	290.7	10.5	4.116	945
679	29/03/2018 06:00:00	0.0327047	16.23	95.8	0	1.605	284.1	14.32	3.234	945
680	29/03/2018 07:00:00	57.4898	16.91	85.9	0	1.239	296.6	16.22	2.646	945
681	29/03/2018 08:00:00	279.511	21.31	72.98	0	1.41	282.8	14.17	2.744	946
682	29/03/2018 09:00:00	513.364	23.98	66.85	0	1.808	294.8	16.95	3.43	946
683	29/03/2018 10:00:00	710.75	26.58	55.94	0	1.345	38.07	36.77	3.822	946
684	29/03/2018 11:00:00	855.038	28.04	56.96	0	1.831	46.23	33.45	4.606	946
685	29/03/2018 12:00:00	929.723	28.96	51.81	0	1.649	52.95	30.31	4.116	945
686	29/03/2018 13:00:00	935.41	30	48.34	0	2.093	52.95	32.48	5.096	945
687	29/03/2018 14:00:00	869.48	31.08	41.93	0	1.971	73.56	32.02	5.39	944
688	29/03/2018 15:00:00	731.017	31.85	40.77	0	2.223	94.2	33.54	5.194	943
689	29/03/2018 16:00:00	528.829	31.66	43.82	0	1.824	89.6	32.02	4.704	943
690	29/03/2018 17:00:00	293.63	31.41	44.38	0	1.676	60.81	25.54	3.626	942
691	29/03/2018 18:00:00	71.4611	29.54	54.78	0	1.726	81.2	14.91	3.43	942
692	29/03/2018 19:00:00	0.00963463	26.1	64.4	0	0.881	106	18.61	1.568	942
693	29/03/2018 20:00:00	0	24.53	74.3	0	0.715	99.3	20.99	1.666	943
694	29/03/2018 21:00:00	0	23.61	71.34	0	0.733	92.8	32.88	1.47	944
695	29/03/2018 22:00:00	0	23.23	74.2	0	1.296	130.6	20.77	2.45	944
696	29/03/2018 23:00:00	0	22.66	75.24	0	0.903	102.2	16.59	2.156	945
697	30/03/2018 00:00:00	0	22.51	75.85	0	1.112	102	13.08	2.156	945
698	30/03/2018 01:00:00	0	22.27	79.54	0	1.285	108.9	17.15	2.842	945
699	30/03/2018 02:00:00	0	21.81	82.7	0	1.372	126.2	13.33	2.254	944
700	30/03/2018 03:00:00	0	20.68	89.6	0	1.025	278.8	66.21	2.156	944
701	30/03/2018 04:00:00	0	19.65	92.6	0	1.041	232.9	28	1.764	944
702	30/03/2018 05:00:00	0	19.23	93.4	0	0.875	230.4	31.1	1.666	944
703	30/03/2018 06:00:00	0.0209026	18.74	93.8	0	0.752	301.9	15.99	2.842	944
704	30/03/2018 07:00:00	57.2807	19.55	79.79	0	1.446	267.2	18.05	3.234	945
705	30/03/2018 08:00:00	272.878	24.33	64.14	0	0.816	300.6	28.18	2.156	946
706	30/03/2018 09:00:00	507.485	26.62	59.2	0	1.318	281	20.82	2.842	946
707	30/03/2018 10:00:00	707.288	27.98	60.35	0	1.875	284.8	22.74	3.822	946
708	30/03/2018 11:00:00	852.652	29.14	52.73	0	1.532	266.8	35.45	3.724	946
709	30/03/2018 12:00:00	923.3	31.18	47.71	0	1.031	4.153	75.35	3.136	945
710	30/03/2018 13:00:00	914.821	32.31	45.36	0	1.334	70.4	57.58	3.528	944
711	30/03/2018 14:00:00	849.292	33.01	43.22	0	1.576	127.8	42.68	3.724	943
712	30/03/2018 15:00:00	598.751	33.25	43.55	0	1.172	82.7	58.2	3.234	942
713	30/03/2018 16:00:00	533.236	33.68	45.7	0	1.527	85.4	41.11	4.116	942
714	30/03/2018 17:00:00	290.415	32.95	47.44	0	2.392	90.9	25.57	4.606	942
715	30/03/2018 18:00:00	67.5593	31.19	56.67	0	1.691	91.8	17.32	3.332	942
716	30/03/2018 19:00:00	0	27.63	67.52	0	0.889	104.2	25.22	2.156	942
717	30/03/2018 20:00:00	0	26.65	68.01	0	1.291	145.3	10.31	2.254	942
718	30/03/2018 21:00:00	0	25.41	74.14	0	0.952	140.2	27.86	1.862	943
719	30/03/2018 22:00:00	0	24.57	72.35	0	1.126	168	23.94	1.96	944
720	30/03/2018 23:00:00	0	23.78	81.2	0	0.979	123.8	28.48	1.96	944
721	31/03/2018 00:00:00	0	23.64	74.64	0	1.748	133.6	13.21	3.234	944
722	31/03/2018 01:00:00	0	23.51	78.09	0	1.662	134.4	10.3	3.136	944
723	31/03/2018 02:00:00	0	22.21	81.3	0	0.626	156.5	32.34	2.058	945
724	31/03/2018 03:00:00	0	21.79	82	0	1.086	203.2	34.69	2.254	944
725	31/03/2018 04:00:00	0	22.24	81.3	0	1.508	202.9	31.34	4.802	944
726	31/03/2018 05:00:00	0	22.15	81.3	0	1.418	185.5	21.06	3.332	945
727	31/03/2018 06:00:00	0.013397	20.99	79.61	0	0.865	268.6	47.85	3.136	945
728	31/03/2018 07:00:00	35.4085	20.67	76.52	0	1.204	262.1	48.28	2.842	946
729	31/03/2018 08:00:00	268.76	23.52	66.96	0	1.155	225.2	41.86	2.842	947
730	31/03/2018 09:00:00	493.669	25.31	64.13	0	1.315	246.5	38.23	3.332	947
731	31/03/2018 10:00:00	568.444	26.06	66.95	0	1.448	226.4	37.4	3.626	947
732	31/03/2018 11:00:00	710.436	27.1	61.13	0	1.319	197.6	41.26	3.528	947
733	31/03/2018 12:00:00	931.847	28.63	57.77	0	1.492	201.5	38.35	4.704	946
734	31/03/2018 13:00:00	908.402	29.91	53.43	0	1.558	136.1	41.33	3.724	945
735	31/03/2018 14:00:00	768.48	30.46	52.17	0	1.901	121.2	32.11	5.39	944
736	31/03/2018 15:00:00	510.547	30.62	53.81	0	2.098	145.8	31.4	4.508	944
737	31/03/2018 16:00:00	408.74	30.58	46.03	0	1.906	142.8	28.67	4.508	943
738	31/03/2018 17:00:00	275.371	30.66	48.73	0	2.295	156.5	25.86	4.9	943
739	31/03/2018 18:00:00	58.4435	29	60.56	0	1.707	181.8	18.73	3.528	943
740	31/03/2018 19:00:00	0	26.08	65.9	0	1.362	206.6	9.68	2.45	943
741	31/03/2018 20:00:00	0	25.82	57.5	0	1.47	186.4	21.85	4.9	944
742	31/03/2018 21:00:00	0	26.38	59.59	0	1.835	146.7	14.8	4.116	945
743	31/03/2018 22:00:00	0	26.16	59.76	0	2.508	142.1	15.5	4.704	945
744	31/03/2018 23:00:00	0	25.39	62.26	0	3.091	133	14.18	7.252	946
745	01/04/2018 00:00:00	0	24.51	69.26	0	3.914	133	13.71	8.13	946
746	01/04/2018 01:00:00	0	23.54	72.27	0	3.643	137.1	15.38	8.04	946
747	01/04/2018 02:00:00	0	22.27	75.15	0	2.299	99.1	41.39	5.194	946
748	01/04/2018 03:00:00	0	21.56	73.7	0	1.673	94.9	19.98	4.116	946
749	01/04/2018 04:00:00	0	21.41	76.21	0	1.638	112.4	16.2	3.822	946
750	01/04/2018 05:00:00	0	20.74	80.9	0	0.973	104.6	16.95	2.842	946
751	01/04/2018 06:00:00	0	19.9	86.8	0	0.614	91.9	20.17	1.47	946
752	01/04/2018 07:00:00	52.0586	19.98	81.9	0	1.188	134.4	15.55	2.058	947
753	01/04/2018 08:00:00	223.628	21.8	74.1	0	1.673	116.3	18.34	3.234	947
754	01/04/2018 09:00:00	439.238	23.88	67.11	0	1.715	110.1	27.68	4.116	947
755	01/04/2018 10:00:00	534.912	24.95	62.23	0	1.61	93.4	34.61	3.822	948
756	01/04/2018 11:00:00	691.896	26.64	57.66	0	1.506	129	48.69	3.724	947
757	01/04/2018 12:00:00	752.175	27.36	56.75	0	2.141	126.8	29.72	5.39	947
758	01/04/2018 13:00:00	563.135	27.29	55.87	0	2.85	139.2	19.29	6.566	946
759	01/04/2018 14:00:00	562.81	27.7	59.36	0	2.686	157.9	30.22	5.292	945
760	01/04/2018 15:00:00	482.801	27.45	61.27	0	3.053	190.2	28.42	5.978	945
761	01/04/2018 16:00:00	458.751	27.18	66.14	0	3.588	218.5	20.11	6.762	944
762	01/04/2018 17:00:00	160.839	25.54	72.89	0	3.632	201.2	15.62	6.272	944
763	01/04/2018 18:00:00	30.9018	23.88	76.85	0	3.412	209.3	13.65	6.272	944
764	01/04/2018 19:00:00	0.00803395	22.54	80.2	0	1.528	204.9	22.57	4.9	945
765	01/04/2018 20:00:00	0	21.75	85.6	0	1.524	284	37.55	3.724	945
766	01/04/2018 21:00:00	0	20.85	91.2	0	1.104	263.8	24.97	2.254	946
767	01/04/2018 22:00:00	0	20.52	92.1	0	0.799	265.6	20.7	1.862	946
768	01/04/2018 23:00:00	0.0932561	21.36	88.1	0	0.722	218.2	41.54	2.646	947
769	02/04/2018 00:00:00	0.0171476	22.2	89.2	0	1.868	170.4	19.64	4.116	947
770	02/04/2018 01:00:00	0	22.02	89.2	0	2.311	156.5	18.44	4.508	946
771	02/04/2018 02:00:00	0	21.82	91.1	0	2.785	153.2	16.98	5.88	946
772	02/04/2018 03:00:00	0	21.24	94.3	0	2.644	132.5	15.79	4.998	946
773	02/04/2018 04:00:00	0	20.67	95.2	0	2.327	125.2	15.96	4.802	946
774	02/04/2018 05:00:00	0	20.09	95.9	0	0.808	95.7	41.39	2.842	946
775	02/04/2018 06:00:00	0.00643156	19.54	97	0	0.926	93.2	35.1	1.96	946
776	02/04/2018 07:00:00	11.7778	20.13	92.2	0	1.269	118.6	15.62	2.058	946
777	02/04/2018 08:00:00	64.1936	20.67	89.2	0	1.39	90.2	15.29	2.45	947
778	02/04/2018 09:00:00	115.216	21.15	86.9	0	1.518	109.4	21.03	2.94	947
779	02/04/2018 10:00:00	230.509	22.48	80.6	0	1.298	118.1	27.03	2.744	947
780	02/04/2018 11:00:00	395.734	23.84	73.23	0	1.41	138	23.63	3.234	947
781	02/04/2018 12:00:00	475.465	25.3	69.5	0	1.455	150	30.42	3.92	946
782	02/04/2018 13:00:00	408.489	25.22	64.44	0	2.145	145.6	25.65	4.312	945
783	02/04/2018 14:00:00	558.804	25.87	66.43	0	2.502	199.9	30.35	5.586	944
784	02/04/2018 15:00:00	481.809	26.47	64.17	0	2.121	195.1	35.35	5.096	943
785	02/04/2018 16:00:00	476.147	26.74	65.54	0	2.717	206.5	24.32	5.39	943
786	02/04/2018 17:00:00	202.544	25.64	66.05	0	2.704	214.1	16.93	4.9	943
787	02/04/2018 18:00:00	53.5804	24.62	75.51	0	1.517	215.9	18.54	3.43	944
788	02/04/2018 19:00:00	0	22.56	80.4	0	1.212	223.6	14.82	2.156	944
789	02/04/2018 20:00:00	0	21.38	82	0	0.988	232.9	25.33	2.646	944
790	02/04/2018 21:00:00	0	21.5	81.6	0	1.081	212.4	18.39	2.646	945
791	02/04/2018 22:00:00	0	20.36	88.5	0	1.403	278.5	18.34	2.548	945
792	02/04/2018 23:00:00	0	19.44	92.2	0	0.78	291.3	16.81	1.764	945
793	03/04/2018 00:00:00	0	19.32	89.3	0	1.668	283.9	14.85	2.744	945
794	03/04/2018 01:00:00	0	19.15	93.2	0	1.862	287.7	9.51	3.234	945
795	03/04/2018 02:00:00	0	18.62	94.6	0	1.1	260.2	20.48	2.352	945
796	03/04/2018 03:00:00	0.0182243	18.18	93.8	0	0.798	279.4	22.36	1.862	945
797	03/04/2018 04:00:00	0.0203667	19.49	91.5	0	0.522	267.1	14.27	1.176	945
798	03/04/2018 05:00:00	0	20.55	87.4	0	1.019	132.4	36.03	3.038	945
799	03/04/2018 06:00:00	0.00267911	20.55	88.2	0	0.844	104.4	21.96	2.646	945
800	03/04/2018 07:00:00	38.5941	20.69	83	0	0.798	138	22.84	1.568	945
801	03/04/2018 08:00:00	178.115	22.13	76.75	0	0.626	110.6	37.9	2.254	946
802	03/04/2018 09:00:00	304.073	23.13	80.5	0	1.175	229	59.37	2.94	946
803	03/04/2018 10:00:00	431.443	23.95	69.52	0	1.153	210.3	49.62	3.43	947
804	03/04/2018 11:00:00	442.57	25.33	64.58	0	0.923	190.1	54.12	2.646	946
805	03/04/2018 12:00:00	558.497	26.81	57.58	0	1.118	166.2	65.67	3.528	946
806	03/04/2018 13:00:00	416.239	27	54.83	0	1.475	226.2	62.29	3.528	945
807	03/04/2018 14:00:00	722.616	28.75	46.72	0	1.463	113.8	36.74	4.41	944
808	03/04/2018 15:00:00	755.833	30.18	42.96	0	1.887	116.2	51.39	4.508	943
809	03/04/2018 16:00:00	461.382	30.01	42.9	0	1.294	173.9	74.55	3.626	943
810	03/04/2018 17:00:00	292.72	29.66	45.39	0	1.306	224.5	44.12	3.528	943
811	03/04/2018 18:00:00	60.6682	27.9	53.75	0	1.337	212.5	20.91	2.548	943
812	03/04/2018 19:00:00	0	24.56	61.77	0	0.768	176.2	44.26	2.156	943
813	03/04/2018 20:00:00	0	23.19	67.03	0	0.679	189.3	16.92	1.568	944
814	03/04/2018 21:00:00	0	21.71	76.66	0	1.208	264.5	30.68	2.058	944
815	03/04/2018 22:00:00	0.053589	21.07	69.3	0	0.834	239.8	36.74	1.764	944
816	03/04/2018 23:00:00	0.0337616	22.08	71.37	0	1.005	222.3	20.93	1.862	945
817	04/04/2018 00:00:00	0	20.85	81.9	0	0.605	321.1	23.38	2.058	945
818	04/04/2018 01:00:00	0	20.09	81.9	0	2.068	278.5	10.66	4.606	945
819	04/04/2018 02:00:00	0	20.4	78.15	0	2.062	281	13.43	3.43	945
820	04/04/2018 03:00:00	0	20.59	81	0	1.504	270	23.19	3.038	945
821	04/04/2018 04:00:00	0	19.91	84.1	0	1.065	272.9	16.32	2.058	945
822	04/04/2018 05:00:00	0.087898	19.95	83.5	0	1.07	256.3	11.5	1.666	945
823	04/04/2018 06:00:00	0.0300129	20.66	84.7	0	1.254	227.6	20.71	2.94	945
824	04/04/2018 07:00:00	18.7673	21.05	84.1	0	1.539	218.8	15.12	3.038	946
825	04/04/2018 08:00:00	136.568	22.08	79.84	0	1.264	222	28.55	2.744	946
826	04/04/2018 09:00:00	356.59	23.94	71.63	0	1.783	144.2	20.45	3.822	947
827	04/04/2018 10:00:00	422.088	24.64	71.66	0	1.528	141.6	34.58	3.234	947
828	04/04/2018 11:00:00	335.87	24.96	67.16	0	1.36	120.9	24.19	3.136	946
829	04/04/2018 12:00:00	676.341	26.58	60.44	0	1.038	232.2	70.68	3.136	946
830	04/04/2018 13:00:00	674.103	27.92	57.09	0	1.355	161.2	61.07	3.724	944
831	04/04/2018 14:00:00	484.246	28.13	55.46	0	1.607	147.6	35.22	4.41	944
832	04/04/2018 15:00:00	450.418	28.67	56.14	0	2.007	133.5	29.58	5.096	943
833	04/04/2018 16:00:00	351.356	28.32	55.22	0	2.418	118.1	31.66	5.194	943
834	04/04/2018 17:00:00	155.048	27.79	62.73	0	2.296	103.7	18.69	5.096	943
835	04/04/2018 18:00:00	49.2523	26.46	65.25	0	2.313	123.3	15.1	4.606	943
836	04/04/2018 19:00:00	0.0080315	25	72.7	0	2.218	133.1	13.52	3.92	943
837	04/04/2018 20:00:00	0	23.84	79	0	2.475	138.4	15.61	4.41	943
838	04/04/2018 21:00:00	0	22.83	84.5	0	1.63	138.4	19.47	3.528	943
839	04/04/2018 22:00:00	0	21.21	92.1	0	0.709	355.3	29	2.646	944
840	04/04/2018 23:00:00	0	20.55	92.6	0	0.593	228.1	25.57	1.568	944
841	05/04/2018 00:00:00	0	20.15	94	0	0.889	233.8	16.19	1.568	943
842	05/04/2018 01:00:00	0	19.91	94.9	0	1.03	237.8	18.92	2.058	944
843	05/04/2018 02:00:00	0	19.94	95	0	0.915	258.9	35.32	1.568	944
844	05/04/2018 03:00:00	0	19.83	95.2	0	1.329	299.3	14.79	2.548	943
845	05/04/2018 04:00:00	0	20.19	93.9	0	1.012	281	11.41	1.862	943
846	05/04/2018 05:00:00	0	20.36	94.1	0	0.843	296	13.45	1.47	943
847	05/04/2018 06:00:00	0.00375173	19.88	95.7	0	0.691	254.9	33.27	1.372	943
848	05/04/2018 07:00:00	53.2072	20.15	86	0	0.775	222	49.43	1.862	943
849	05/04/2018 08:00:00	259.732	23.38	77.63	0	1.343	267.2	17.1	2.646	943
850	05/04/2018 09:00:00	488.258	25.7	69.83	0	0.981	256.3	36.84	2.646	943
851	05/04/2018 10:00:00	536.866	26.55	62.69	0	1.205	290.6	44.86	3.626	943
852	05/04/2018 11:00:00	660.95	28.09	56.4	0	1.162	5.055	41.16	3.626	943
853	05/04/2018 12:00:00	856.441	29.98	50.01	0	1.639	75.7	44.67	5.292	942
854	05/04/2018 13:00:00	906.447	31.21	39.36	0	1.653	50.08	45.64	4.018	941
855	05/04/2018 14:00:00	819.428	32.25	37.24	0	1.566	79.32	59.85	4.018	940
856	05/04/2018 15:00:00	422.639	31.7	41.37	0	1.437	72.26	41.07	4.214	939
857	05/04/2018 16:00:00	142.04	28.89	55.46	0	2.275	36.81	19.51	5.488	939
858	05/04/2018 17:00:00	111.842	28.48	57.46	0	1.536	33.54	24.66	3.724	939
859	05/04/2018 18:00:00	48.3134	27.06	64.43	0	0.765	350.9	13	2.646	939
860	05/04/2018 19:00:00	0	25.38	69.21	0	0.359	175	20.29	1.176	939
861	05/04/2018 20:00:00	0	24.71	72.95	0	0.525	267.9	44.98	1.372	940
862	05/04/2018 21:00:00	0	24.06	75.94	0	0.477	270.1	38.6	1.372	940
863	05/04/2018 22:00:00	0	24.19	75.18	0	1.456	259.1	30.08	3.528	941
864	05/04/2018 23:00:00	0	24.5	75.53	0	3.179	235.4	14.54	7.252	941
865	06/04/2018 00:00:00	0	23.33	80.7	0	3.199	259.7	20.68	6.86	941
866	06/04/2018 01:00:00	0.0562539	21.54	88.6	0	2.967	278.1	13.45	5.684	941
867	06/04/2018 02:00:00	0.0219676	20.74	94.2	0	2.385	297.6	24.92	5.39	941
868	06/04/2018 03:00:00	0	20.67	95.6	0	0.899	285.2	27.83	2.45	941
869	06/04/2018 04:00:00	0	20.69	94.9	0	0.86	283.6	29.88	2.45	941
870	06/04/2018 05:00:00	0	20.6	95.2	0	0.593	255.9	40.16	1.862	941
871	06/04/2018 06:00:00	0	20.75	96.1	0	0.453	272.9	57.35	1.764	941
872	06/04/2018 07:00:00	14.7041	20.79	96.2	0	0.466	5.088	29.74	1.078	942
873	06/04/2018 08:00:00	68.1032	21.28	93.4	0	0.772	146	30.02	2.45	943
874	06/04/2018 09:00:00	270.612	23.19	78.96	0	0.661	309.9	63.33	2.058	943
875	06/04/2018 10:00:00	378.101	25.72	69.99	0	0.672	18.75	43.65	2.156	943
876	06/04/2018 11:00:00	495.171	27.29	64.4	0	1.312	52.26	29.4	3.43	943
877	06/04/2018 12:00:00	768.306	28.6	59.11	0	1.813	57.68	27.17	3.822	942
878	06/04/2018 13:00:00	693.258	29.6	55.3	0	2.204	42.61	26.33	5.782	941
879	06/04/2018 14:00:00	498.042	29.87	54.74	0	1.232	22.71	68.16	3.528	941
880	06/04/2018 15:00:00	455.64	29.52	60.29	0	2.251	276.9	22.31	5.684	940
881	06/04/2018 16:00:00	400.871	29.36	59.56	0	2.152	261.8	21.66	5.096	940
882	06/04/2018 17:00:00	153.06	28.52	66.5	0	1.306	278	29.59	2.646	940
883	06/04/2018 18:00:00	36.334	27.36	68.12	0	0.912	255	20.93	1.764	940
884	06/04/2018 19:00:00	0	25.41	75.53	0	1.075	182.6	12.08	2.156	941
885	06/04/2018 20:00:00	0	24.68	81.7	0	0.631	137.8	71.85	1.47	941
886	06/04/2018 21:00:00	0	24.2	81.1	0	0.663	160.6	37.61	1.372	942
887	06/04/2018 22:00:00	0	23.8	87	0	1.004	144.4	28.13	2.254	942
888	06/04/2018 23:00:00	0	22.47	86.9	0	1.491	233.6	37.83	4.312	943
889	07/04/2018 00:00:00	0	22.49	88.6	0	1.112	262.8	45.09	3.332	943
890	07/04/2018 01:00:00	0	21.23	87.6	0	1.232	284.5	18.41	2.94	943
891	07/04/2018 02:00:00	0	21.25	88.2	0	1.111	241.7	38.18	2.058	942
892	07/04/2018 03:00:00	0	20.75	89.5	0	0.755	236.8	35.54	2.352	942
893	07/04/2018 04:00:00	0	19.85	95.4	0	1.059	309.4	62.67	3.43	942
894	07/04/2018 05:00:00	0	19.13	94.2	0	1.389	273.5	15.99	2.254	942
895	07/04/2018 06:00:00	0	19.6	90.8	0	1.584	279.3	16.82	3.234	943
896	07/04/2018 07:00:00	50.3838	19.99	81.5	0	2.175	288.3	13.39	3.136	943
897	07/04/2018 08:00:00	257.741	24.18	69.3	0	2.395	259.4	20.14	3.92	944
898	07/04/2018 09:00:00	486.459	26.52	61.41	0	2.864	250.2	15.6	4.606	944
899	07/04/2018 10:00:00	678.167	28.31	56.51	0	2.558	269.4	17.46	4.41	944
900	07/04/2018 11:00:00	817.668	30.37	43.8	0	1.906	268.6	29.33	4.9	944
901	07/04/2018 12:00:00	891.121	32.55	38.89	0	1.033	335.4	77.57	3.724	944
902	07/04/2018 13:00:00	893.572	33.37	36.81	0	1.902	149.3	38.92	6.272	943
903	07/04/2018 14:00:00	369.529	32.68	39.52	0	1.537	116.3	33.72	3.822	942
904	07/04/2018 15:00:00	467.366	33.07	35.91	0	2.344	142.2	31.98	6.37	942
905	07/04/2018 16:00:00	469.104	33.85	34.38	0	2.516	139	23.83	5.684	942
906	07/04/2018 17:00:00	152.692	32.31	51.53	0	2.25	110.5	25.01	5.586	942
907	07/04/2018 18:00:00	24.943	29.14	63.4	0	1.804	85.4	18.46	4.802	942
908	07/04/2018 19:00:00	0	27.44	62.26	0	1.668	131.3	20.31	3.43	943
909	07/04/2018 20:00:00	0	27.09	62.63	0	2.254	145.4	17.19	4.508	944
910	07/04/2018 21:00:00	0	26.64	59.3	0	2.651	154.7	14.01	5.782	945
911	07/04/2018 22:00:00	0	26.54	59.08	0	2.877	155.4	14.37	5.194	945
912	07/04/2018 23:00:00	0	26.1	70.47	0	3.716	160.8	17.54	7.056	946
913	08/04/2018 00:00:00	0	25.09	76.93	0	1.843	142.8	21.89	5.194	946
914	08/04/2018 01:00:00	0	23.63	82.3	0	0.716	175.6	26.19	2.058	946
915	08/04/2018 02:00:00	0	23.16	82.8	0	1.494	216.4	21.2	3.626	947
916	08/04/2018 03:00:00	0	23.58	84.6	0	2.41	222.8	14.73	4.704	947
917	08/04/2018 04:00:00	0	23.33	86.9	0	1.268	168	35.45	2.744	947
918	08/04/2018 05:00:00	0	22.43	91.4	0	1.828	133	11.55	3.038	946
919	08/04/2018 06:00:00	0	21.54	94	0	1.57	135.1	12.02	2.744	947
920	08/04/2018 07:00:00	12.2041	21.82	89.1	0	1.483	215.1	26.53	3.332	947
921	08/04/2018 08:00:00	39.5084	22.43	88.2	0	1.097	220	22.64	2.45	948
922	08/04/2018 09:00:00	96.6481	23.13	87.8	0	1.907	188	16.81	4.214	948
923	08/04/2018 10:00:00	271.51	24.61	82.8	0	1.613	201.2	34.17	3.528	949
924	08/04/2018 11:00:00	284.092	25.6	73.14	0	1.48	197	34.77	3.43	949
925	08/04/2018 12:00:00	614.299	28.02	61.63	0	2.176	169.4	26.68	4.508	949
926	08/04/2018 13:00:00	846.585	29.77	54.09	0	2.89	161.3	25.44	5.88	948
927	08/04/2018 14:00:00	661.223	30.26	53.62	0	3.425	157.1	22.09	6.762	947
928	08/04/2018 15:00:00	640.537	30.96	51.46	0	3.687	152.7	20.54	7.546	947
929	08/04/2018 16:00:00	370.249	30.57	51.66	0	3.827	160	18.67	7.84	947
930	08/04/2018 17:00:00	155.846	29.09	54.94	0	4.09	141.1	18.2	8.04	947
931	08/04/2018 18:00:00	29.5923	27.25	76.25	0	3.355	138	35.75	7.154	948
932	08/04/2018 19:00:00	0	23.75	74.88	0	1.611	61.47	48.4	4.802	948
933	08/04/2018 20:00:00	0	23.74	84.6	0	2.814	108.2	37.78	9.6	949
934	08/04/2018 21:00:00	0	23.68	76.58	0	2.89	145.5	29.22	10.78	950
935	08/04/2018 22:00:00	0	23.92	79.63	0	5.209	153.2	15.36	11.27	950
936	08/04/2018 23:00:00	0	23.43	82.6	0	5.042	145	15.35	9.7	950
937	09/04/2018 00:00:00	0	23	83.4	0	3.978	147.8	16.91	8.82	951
938	09/04/2018 01:00:00	0	22.04	88.4	0	5.284	159.8	18.11	11.07	951
939	09/04/2018 02:00:00	0	21.69	86.9	0	4.3	156.7	17.63	9.31	950
940	09/04/2018 03:00:00	0	21.55	87.4	0	4.297	163.3	16.28	8.92	950
941	09/04/2018 04:00:00	0	21.36	88.3	0	3.168	172.8	16.97	6.762	950
942	09/04/2018 05:00:00	0	21.42	86.4	0	3.444	165.1	17.97	7.546	950
943	09/04/2018 06:00:00	0	21.21	88.7	0	3.273	174.5	16.98	7.644	950
944	09/04/2018 07:00:00	19.4248	21.07	87.4	0	3.978	179.2	16.03	8.04	950
945	09/04/2018 08:00:00	108.998	21.48	83.9	0	4.076	169.5	17.42	9.41	951
946	09/04/2018 09:00:00	221.454	21.98	83.7	0	4.413	166.7	17.23	9.21	951
947	09/04/2018 10:00:00	138.532	21.35	94.2	0.254	3.275	165.3	17.89	7.154	951
948	09/04/2018 11:00:00	285.547	21.31	88.2	0	3.308	154.5	15.66	6.272	951
949	09/04/2018 12:00:00	284.813	22.29	88.7	0	3.438	171.9	19.55	6.664	950
950	09/04/2018 13:00:00	315.15	22.47	82.5	0	2.566	172.5	20.29	5.978	950
951	09/04/2018 14:00:00	510.089	24.56	72.81	0	2.982	155.6	20.09	6.37	949
952	09/04/2018 15:00:00	377.94	25.37	70.11	0	2.552	172.9	28.5	5.39	948
953	09/04/2018 16:00:00	246.214	25.28	74.46	0	2.195	194	22.47	4.9	947
954	09/04/2018 17:00:00	94.734	24.64	69.64	0	1.386	203	21.44	3.626	947
955	09/04/2018 18:00:00	25.8774	23.94	77.54	0	1.187	212	19.57	2.254	947
956	09/04/2018 19:00:00	0	22.22	89.6	0	1.018	253.8	42.98	1.862	947
957	09/04/2018 20:00:00	0	21.34	90.9	0	1.048	273.3	13.33	2.058	948
958	09/04/2018 21:00:00	0	21.04	93	0	0.659	275.3	21.13	1.764	948
959	09/04/2018 22:00:00	0.000535796	21.17	91	0	0.944	263	20.13	1.862	948
960	09/04/2018 23:00:00	0	20.64	94.8	0	1.086	274.8	26.16	1.96	947
961	10/04/2018 00:00:00	0	19.57	95.9	0	1.424	265.6	14.33	2.45	947
962	10/04/2018 01:00:00	0	19.54	96	0	0.853	248.8	13.73	1.666	947
963	10/04/2018 02:00:00	0	18.93	96.9	0	0.231	262.7	32.51	1.078	946
964	10/04/2018 03:00:00	0	19.75	94	0	0.778	114.6	40.23	1.764	946
965	10/04/2018 04:00:00	0	20.31	94.7	0	0.799	97.6	34.9	2.254	945
966	10/04/2018 05:00:00	0	20.21	95.4	0	0.51	352.2	49.1	1.862	945
967	10/04/2018 06:00:00	0	20.18	95.4	0	0.146	316.3	30.97	1.078	945
968	10/04/2018 07:00:00	10.9745	20.12	95.7	0	1.253	250.3	18.79	3.43	945
969	10/04/2018 08:00:00	72.1523	20.24	90.1	0	1.167	249.1	26.13	2.646	946
970	10/04/2018 09:00:00	186.127	21.8	82.1	0	0.501	292.9	43.09	1.47	946
971	10/04/2018 10:00:00	243.733	22.66	81.9	0	1.543	264.6	20.92	3.92	947
972	10/04/2018 11:00:00	414.965	24.14	70.92	0	1.303	271.6	29.44	3.038	946
973	10/04/2018 12:00:00	623.653	25.65	67.39	0	1.352	315.8	38.7	4.214	945
974	10/04/2018 13:00:00	868.322	27.4	60.06	0	1.554	5.908	52.4	4.116	944
975	10/04/2018 14:00:00	640.479	28.67	55.49	0	1.022	337.2	60.31	2.744	943
976	10/04/2018 15:00:00	660.029	30.71	52.93	0	1.221	39.57	41.47	3.332	943
977	10/04/2018 16:00:00	397.468	30.14	61.12	0	2.117	26.38	22.6	5.488	942
978	10/04/2018 17:00:00	229.15	29	62.88	0	2.235	30.77	18.68	4.41	942
979	10/04/2018 18:00:00	41.4449	27.45	75.09	0	1.751	71.33	22.87	3.822	942
980	10/04/2018 19:00:00	0	25.19	79.55	0	1.407	98.2	25.88	2.548	942
981	10/04/2018 20:00:00	0	24.39	82.8	0	1.364	125	10.42	2.254	943
982	10/04/2018 21:00:00	0	23.72	85.3	0	1.356	142	11.95	2.058	943
983	10/04/2018 22:00:00	0	23.07	88.6	0	1.126	153.8	15.44	1.862	943
984	10/04/2018 23:00:00	0	21.77	92.9	0	0.745	248.6	47.16	1.96	944
985	11/04/2018 00:00:00	0	21.43	89.5	0	1.061	245.7	24	2.842	944
986	11/04/2018 01:00:00	0	21.74	86.7	0	1.328	217.8	28.42	6.664	944
987	11/04/2018 02:00:00	0	22.67	90.8	0	4.467	161.8	17.08	8.92	945
988	11/04/2018 03:00:00	0	21.92	92.1	0	4.919	152.6	15.73	8.92	945
989	11/04/2018 04:00:00	0.00428627	21.25	93	0	5.38	157.8	16.45	10.19	945
990	11/04/2018 05:00:00	0	20.25	87.9	0	4.935	165.2	17.48	9.7	946
991	11/04/2018 06:00:00	0	19.89	90.6	0	3.957	169.5	17.79	8.13	947
992	11/04/2018 07:00:00	2.26498	19.25	91.9	0	4.38	167.3	17.19	9.02	948
993	11/04/2018 08:00:00	19.649	18.69	94.4	0	3.049	175.8	21.44	8.13	949
994	11/04/2018 09:00:00	32.5866	18.16	95.2	0.254	2.087	184.8	22.37	6.468	949
995	11/04/2018 10:00:00	23.6971	18.15	96.4	0	1.354	189.2	39.7	5.194	950
996	11/04/2018 11:00:00	47.7699	18.29	93.8	0	2.634	178.1	20.94	7.252	950
997	11/04/2018 12:00:00	46.6578	18.01	96.8	0	2.222	177.5	24.11	6.076	950
998	11/04/2018 13:00:00	48.3991	17.66	96.6	0	2.384	173.2	22.43	7.742	950
999	11/04/2018 14:00:00	37.647	17.41	96.1	0	2.252	175.5	23.82	8.04	949
1000	11/04/2018 15:00:00	70.1697	17.19	92	0	2.659	176.9	22.01	5.88	949
1001	11/04/2018 16:00:00	52.996	17.8	93.1	0	2.307	185	17.85	4.704	949
1002	11/04/2018 17:00:00	29.1366	17.15	96.3	0	2.427	192.1	17.16	5.88	949
1003	11/04/2018 18:00:00	7.45223	16.6	94.8	0	2.041	188	20.07	4.312	949
1004	11/04/2018 19:00:00	0	16.59	90.5	0	2.344	170	24.43	5.782	950
1005	11/04/2018 20:00:00	0	16.93	89.2	0	0.8	120.5	25.71	2.842	951
1006	11/04/2018 21:00:00	0	17.14	88.8	0	0.489	121.1	22.08	2.058	951
1007	11/04/2018 22:00:00	0	17.27	90.2	0	0.625	119	27.69	3.234	951
1008	11/04/2018 23:00:00	0	17.01	96.2	0	1.04	118	40.43	2.94	951
1009	12/04/2018 00:00:00	0	16.6	97.7	0	0.82	41.04	42.34	2.058	951
1010	12/04/2018 01:00:00	0	16.53	98.2	0	0.53	333.5	28.85	1.372	951
1011	12/04/2018 02:00:00	0	16.7	96.4	0	0.864	140.6	25.34	2.94	950
1012	12/04/2018 03:00:00	0	16.7	96.5	0	1.467	156.8	19.99	4.312	950
1013	12/04/2018 04:00:00	0	16.31	97.6	0	1.651	150.9	18.08	4.116	950
1014	12/04/2018 05:00:00	0	16.29	98.3	0	1.119	163.6	23.31	2.156	950
1015	12/04/2018 06:00:00	0	16.18	97.9	0	2.317	157.6	17.98	5.292	951
1016	12/04/2018 07:00:00	4.70895	16.03	98.2	0	1.705	173.7	20.06	5.684	952
1017	12/04/2018 08:00:00	25.4754	16.11	97.8	0	2.037	166.1	19.76	5.39	953
1018	12/04/2018 09:00:00	88.7912	16.16	98.4	0.254	2.494	151	17.61	6.86	953
1019	12/04/2018 10:00:00	125.185	16.59	98.4	0	2.235	146	14.98	4.312	953
1020	12/04/2018 11:00:00	208.789	17.07	96.9	0	2.693	149.8	15.66	5.194	953
1021	12/04/2018 12:00:00	303.165	17.65	96.3	0	2.852	155.9	16.53	6.076	952
1022	12/04/2018 13:00:00	287.59	18.3	93.8	0	2.996	149.5	16.77	6.076	952
1023	12/04/2018 14:00:00	468.469	19.57	84	0	3.161	140.7	15.69	5.684	951
1024	12/04/2018 15:00:00	383.147	20.23	78.38	0	3.074	138.9	19.39	5.782	950
1025	12/04/2018 16:00:00	253.992	20.62	87.9	0	2.43	141.4	26.04	5.096	950
1026	12/04/2018 17:00:00	54.575	18.7	94.3	0	1.881	135.8	16.08	5.096	951
1027	12/04/2018 18:00:00	6.14647	18.14	96.4	0	1.135	143.2	43	4.9	951
1028	12/04/2018 19:00:00	0.106121	17.68	96.2	0	1.236	129.9	22.57	5.684	952
1029	12/04/2018 20:00:00	0.00107193	17.09	95.3	0	1.475	159.2	27.16	4.116	952
1030	12/04/2018 21:00:00	0	17.53	95.2	0	0.922	199.5	18.71	2.94	952
1031	12/04/2018 22:00:00	0	17.59	96.7	0	0.607	246.7	35.21	1.862	952
1032	12/04/2018 23:00:00	0	17.33	97.4	0	0.833	269.4	22.23	2.058	952
1033	13/04/2018 00:00:00	0	16.73	97.9	0	0.261	200.8	7.023	1.176	952
1034	13/04/2018 01:00:00	0	16.3	99	0	0.353	278	14.15	1.078	952
1035	13/04/2018 02:00:00	0	15.53	99.3	0	0.58	263.5	29.89	1.372	952
1036	13/04/2018 03:00:00	0	15.06	99.6	0	0.636	265.5	26.83	1.372	951
1037	13/04/2018 04:00:00	0	14.99	99.8	0	0.693	260.4	8.78	1.274	951
1038	13/04/2018 05:00:00	0	15.06	100	0	1.032	241.5	11.17	1.666	951
1039	13/04/2018 06:00:00	0	15.01	100	0	0.984	258.6	32.64	1.764	951
1040	13/04/2018 07:00:00	36.163	14.83	99.3	0	0.75	284.1	18.2	1.666	952
1041	13/04/2018 08:00:00	246.856	17.85	88.1	0	0.31	323.4	26.88	0.98	953
1042	13/04/2018 09:00:00	439.177	19.98	72.57	0	0.82	56.94	52.17	2.45	953
1043	13/04/2018 10:00:00	245.136	20	77.33	0	0.88	115	59.76	2.548	953
1044	13/04/2018 11:00:00	487.449	20.79	71.22	0	1.615	304.5	30.59	3.332	953
1045	13/04/2018 12:00:00	421.512	21.75	65.65	0	1.044	307.3	40.97	2.352	952
1046	13/04/2018 13:00:00	703.344	23.02	61.89	0	1.085	7.598	59.85	2.646	951
1047	13/04/2018 14:00:00	735.894	24.15	58.26	0	1.183	105.6	58.12	3.038	950
1048	13/04/2018 15:00:00	635.256	25.62	56.91	0	1.248	71.9	52.01	3.234	949
1049	13/04/2018 16:00:00	458.066	26.23	55.46	0	1.035	66.14	50.61	3.234	949
1050	13/04/2018 17:00:00	228.884	25.23	61.94	0	1.565	69.72	26.08	3.332	949
1051	13/04/2018 18:00:00	34.5767	23.28	78.36	0	1.404	58.24	14.65	2.842	948
1052	13/04/2018 19:00:00	0	20.31	85.9	0	1.325	49.21	15.58	3.038	949
1053	13/04/2018 20:00:00	0	19.43	87.7	0	1.153	109.8	29.03	2.548	949
1054	13/04/2018 21:00:00	0	19.25	85.8	0	1.838	144	10.92	2.94	950
1055	13/04/2018 22:00:00	0	19.17	89.1	0	1.399	133.7	16.22	3.038	950
1056	13/04/2018 23:00:00	0	17.79	94.6	0	0.661	157.2	44.69	1.568	950
1057	14/04/2018 00:00:00	0	16.85	95.7	0	0.979	272.2	19.15	2.058	949
1058	14/04/2018 01:00:00	0	16.65	96.7	0	1.743	271.2	16.12	3.136	949
1059	14/04/2018 02:00:00	0	16.2	97.5	0	0.941	307.8	25.35	2.156	949
1060	14/04/2018 03:00:00	0	15.55	98.3	0	1.272	285.4	8.85	2.156	949
1061	14/04/2018 04:00:00	0	15.75	98.1	0	1.356	290.4	10.44	2.352	949
1062	14/04/2018 05:00:00	0	15.4	98.1	0	1.789	282.5	10.88	2.744	949
1063	14/04/2018 06:00:00	0	15.25	97.6	0	1.954	281.7	11.52	2.94	949
1064	14/04/2018 07:00:00	42.6945	15.67	91.3	0	1.844	290	8.34	2.744	949
1065	14/04/2018 08:00:00	245.372	18.75	80	0	2.097	297.8	12.31	3.724	950
1066	14/04/2018 09:00:00	461.358	22.01	70.13	0	2.488	294	16.57	5.194	950
1067	14/04/2018 10:00:00	656.288	24.41	59.79	0	3.012	293	19.42	5.292	950
1068	14/04/2018 11:00:00	791.819	26.28	53.67	0	2.431	289.6	23.83	4.704	949
1069	14/04/2018 12:00:00	857.365	27.87	53.24	0	1.881	291.2	35.81	4.704	949
1070	14/04/2018 13:00:00	851.334	29.13	48.37	0	1.301	228.5	57.76	3.528	948
1071	14/04/2018 14:00:00	775.914	29.93	45.06	0	1.332	336	62.42	2.744	947
1072	14/04/2018 15:00:00	642.987	31.01	42.48	0	1.019	323.4	58.87	3.332	946
1073	14/04/2018 16:00:00	457.465	30.87	44.55	0	1.395	184.5	46.71	3.626	946
1074	14/04/2018 17:00:00	217.866	29.84	51.3	0	1.236	93.4	47.21	2.744	946
1075	14/04/2018 18:00:00	30.3907	26.94	66.61	0	1.666	84.2	14.69	3.724	946
1076	14/04/2018 19:00:00	0	24.19	75.1	0	1.014	129.9	35.21	1.96	947
1077	14/04/2018 20:00:00	0	23.28	75.34	0	1.151	141.2	12.74	1.96	947
1078	14/04/2018 21:00:00	0	22.55	75.04	0	1.487	125.1	15.54	3.234	948
1079	14/04/2018 22:00:00	0	22.3	76.5	0	1.755	131.3	13.24	3.038	949
1080	14/04/2018 23:00:00	0	21.7	76.95	0	1.464	122.1	14.97	2.842	949
1081	15/04/2018 00:00:00	0	21.82	77.67	0	1.07	114.2	16.52	2.646	949
1082	15/04/2018 01:00:00	0	21.68	79.57	0	0.895	142.2	18.51	2.058	949
1083	15/04/2018 02:00:00	0	21.16	77.13	0	1.232	157.8	24.59	3.038	950
1084	15/04/2018 03:00:00	0	20.57	82.5	0	2.309	132.4	12.78	4.214	950
1085	15/04/2018 04:00:00	0	20.16	83.9	0	1.713	115.9	16.6	3.724	950
1086	15/04/2018 05:00:00	0	19.75	83.3	0	1.81	113.6	17.69	3.822	950
1087	15/04/2018 06:00:00	0	18.9	88.8	0	1.136	92.9	16.93	2.646	950
1088	15/04/2018 07:00:00	15.5982	18.43	88.6	0	0.397	117.9	53.66	1.568	950
1089	15/04/2018 08:00:00	91.6977	19.75	78.81	0	0.484	36.16	28.23	1.176	951
1090	15/04/2018 09:00:00	170.816	20.81	70.85	0	0.945	145.6	28.48	2.548	952
1091	15/04/2018 10:00:00	322.902	22.16	69.42	0	1.335	128.4	30.18	2.842	952
1092	15/04/2018 11:00:00	621.782	23.6	62.33	0	1.666	142	35.68	3.528	952
1093	15/04/2018 12:00:00	409.682	24.03	66.33	0	1.672	221.7	51.95	4.312	952
1094	15/04/2018 13:00:00	335.652	24.14	63.58	0	1.391	183.2	39.15	3.528	951
1095	15/04/2018 14:00:00	459.846	25.05	59.36	0	1.448	187	42.65	3.528	950
1096	15/04/2018 15:00:00	434.651	25.73	54.07	0	1.99	155.1	27.16	4.312	949
1097	15/04/2018 16:00:00	332.828	26.09	55.42	0	2.341	163.8	30.67	6.076	949
1098	15/04/2018 17:00:00	207.698	26.15	58.42	0	1.239	202.4	25.92	3.038	949
1099	15/04/2018 18:00:00	24.3128	23.98	74.93	0	0.967	198.7	29.45	2.254	949
1100	15/04/2018 19:00:00	0	21.44	74.57	0	1.019	201.1	9.74	2.352	949
1101	15/04/2018 20:00:00	0	20.86	83	0	1.064	206.2	23.97	2.254	950
1102	15/04/2018 21:00:00	0.0117903	21.19	78.34	0	1.928	157	31.28	5.684	950
1103	15/04/2018 22:00:00	0	21.95	77.03	0	3.149	152.5	15.38	7.154	951
1104	15/04/2018 23:00:00	0	21.22	82.8	0	3.362	149.3	16.46	7.252	951
1105	16/04/2018 00:00:00	0	20.14	86.3	0	2.426	163.9	23.57	5.978	951
1106	16/04/2018 01:00:00	0	19.5	86.1	0	2.46	166.2	22.18	6.958	951
1107	16/04/2018 02:00:00	0	19.54	85.7	0	2.917	157.7	18.6	6.762	951
1108	16/04/2018 03:00:00	0	19.45	88.3	0	2.518	159.6	16.54	5.684	951
1109	16/04/2018 04:00:00	0	18.8	89.2	0	2.659	170.6	18.84	5.292	951
1110	16/04/2018 05:00:00	0	18.72	83.4	0	2.235	167.3	19.64	4.998	951
1111	16/04/2018 06:00:00	0	18.59	87.3	0	1.495	185.4	17.33	3.92	951
1112	16/04/2018 07:00:00	9.34827	18.36	89.2	0	2.049	176.2	23.21	5.88	952
1113	16/04/2018 08:00:00	189.894	19.5	78.96	0	2.332	173.8	19.81	4.9	953
1114	16/04/2018 09:00:00	420.317	21.16	69.94	0	2.915	156.2	20.05	6.37	953
1115	16/04/2018 10:00:00	589.594	22.28	66.01	0	3.069	145.7	28.11	6.076	953
1116	16/04/2018 11:00:00	389.123	22.42	68.87	0	2.692	132.1	21.82	5.194	953
1117	16/04/2018 12:00:00	414.646	22.93	66.47	0	2.525	123.6	23.47	5.88	952
1118	16/04/2018 13:00:00	473.636	23.62	60.04	0	2.258	136.9	28.56	5.096	951
1119	16/04/2018 14:00:00	308.665	23.81	57.76	0	2.103	166.5	29.85	4.9	950
1120	16/04/2018 15:00:00	332.623	23.96	51.41	0	2.325	198.5	21.42	4.704	950
1121	16/04/2018 16:00:00	437.92	25.65	50.34	0	1.75	207.9	32.56	4.704	949
1122	16/04/2018 17:00:00	237.434	25.17	53.18	0	1.624	217.6	28.38	3.528	949
1123	16/04/2018 18:00:00	34.9728	22.59	74.55	0	1.572	261.2	19.54	3.43	949
1124	16/04/2018 19:00:00	0	19.9	79.43	0	1.15	269.4	25.09	2.94	950
1125	16/04/2018 20:00:00	0	18.89	84.7	0	0.772	227.6	21.48	1.764	950
1126	16/04/2018 21:00:00	0.0117912	18.72	84.7	0	0.575	261.4	24.12	1.176	951
1127	16/04/2018 22:00:00	0.0262622	18.98	75.43	0	0.386	188.7	24.39	1.862	951
1128	16/04/2018 23:00:00	0.0107193	19.43	76.4	0	1.6	107.7	28.8	5.194	951
1129	17/04/2018 00:00:00	0	18.88	81.5	0	1.73	115.2	16	3.43	951
1130	17/04/2018 01:00:00	0	17.49	88.4	0	1.175	126.5	13.34	2.058	951
1131	17/04/2018 02:00:00	0	16.89	89.9	0	1.263	133.9	12.32	2.352	951
1132	17/04/2018 03:00:00	0	16.58	92.4	0	0.538	77.85	35.98	1.862	950
1133	17/04/2018 04:00:00	0	16.93	91.2	0	1.024	99.2	17.53	2.45	950
1134	17/04/2018 05:00:00	0	16.84	94.5	0	0.239	35.19	49.96	0.882	950
1135	17/04/2018 06:00:00	0	16.96	92.8	0	0.434	148.8	32.59	1.372	951
1136	17/04/2018 07:00:00	14.0366	17.24	90.9	0	0.402	78.64	41.59	1.372	951
1137	17/04/2018 08:00:00	88.4654	17.91	88.2	0	1.541	119.4	13.66	2.842	951
1138	17/04/2018 09:00:00	281.582	19.23	70.85	0	1.812	112.3	22.15	3.234	952
1139	17/04/2018 10:00:00	321.389	20.79	71.98	0	1.249	99.1	30.58	3.43	952
1140	17/04/2018 11:00:00	324.992	21.15	68.63	0	1.036	73.49	33.68	2.94	952
1141	17/04/2018 12:00:00	553.956	22.52	60.37	0	1.112	78.31	57.47	2.94	951
1142	17/04/2018 13:00:00	533.436	23.61	58.31	0	1.223	187.2	52.55	3.332	950
1143	17/04/2018 14:00:00	510.386	24.3	47.41	0	1.704	175.1	35.14	4.018	949
1144	17/04/2018 15:00:00	407.024	24.87	51.29	0	1.307	164.3	68.61	3.724	949
1145	17/04/2018 16:00:00	229.443	24.39	50.08	0	1.154	143.5	43.77	3.234	949
1146	17/04/2018 17:00:00	186.555	24.67	46.95	0	0.773	109.9	21.25	2.058	948
1147	17/04/2018 18:00:00	25.7674	22.05	69.33	0	0.258	357.4	9.84	1.078	948
1148	17/04/2018 19:00:00	0	18.59	80.6	0	0.221	269.3	13.97	1.078	949
1149	17/04/2018 20:00:00	0	17.56	84.8	0	0.677	253.1	14.36	1.274	949
1150	17/04/2018 21:00:00	0	16.54	87.7	0	0.811	260.7	8.68	1.372	949
1151	17/04/2018 22:00:00	0	16.12	83.7	0	1.722	264.4	13.21	3.234	949
1152	17/04/2018 23:00:00	0	15.45	90.4	0	1.525	277.4	13.56	2.548	949
1153	18/04/2018 00:00:00	0	15.43	90	0	1.769	276.2	14.1	3.43	949
1154	18/04/2018 01:00:00	0	15.23	92.3	0	1.311	302.7	52.49	3.43	949
1155	18/04/2018 02:00:00	0	14.65	93.3	0	1.094	167.2	30.62	2.352	949
1156	18/04/2018 03:00:00	0	13.36	94.9	0	0.982	290.3	51.85	2.156	948
1157	18/04/2018 04:00:00	0	13.54	92.6	0	1.218	267.2	13.04	2.352	948
1158	18/04/2018 05:00:00	0	13.18	91.4	0	1.62	275.7	11.42	3.332	948
1159	18/04/2018 06:00:00	0	13.21	93.3	0	2.03	288.1	14.15	3.724	948
1160	18/04/2018 07:00:00	35.1185	13.77	84.7	0	2.308	279	10.9	3.43	948
1161	18/04/2018 08:00:00	217.728	17.14	71.36	0	1.825	287.7	13.96	3.92	949
1162	18/04/2018 09:00:00	450.759	20.43	64.07	0	2.453	280.1	14.63	4.116	949
1163	18/04/2018 10:00:00	642.597	23.04	51.1	0	1.601	286.9	30.26	3.332	949
1164	18/04/2018 11:00:00	772.79	25.52	44.06	0	1.272	9.93	42.5	3.038	948
1165	18/04/2018 12:00:00	842.005	26.57	45.07	0	1.459	343.9	47.34	3.626	947
1166	18/04/2018 13:00:00	835.664	27.62	42.93	0	2.062	289.4	35.51	4.998	947
1167	18/04/2018 14:00:00	762.264	28.58	42.57	0	1.851	282.1	41.32	5.488	945
1168	18/04/2018 15:00:00	609.549	29.41	40.66	0	1.701	252.7	40.62	3.92	945
1169	18/04/2018 16:00:00	407.753	29.66	38.44	0	1.294	335.7	48.46	4.116	944
1170	18/04/2018 17:00:00	191.192	28.6	46.5	0	1.739	37.53	21.22	3.528	944
1171	18/04/2018 18:00:00	22.7205	25.46	63.18	0	1.758	64.69	19.33	3.626	944
1172	18/04/2018 19:00:00	0	22.97	71.17	0	1.212	89.6	18.35	2.646	944
1173	18/04/2018 20:00:00	0	22.31	72.83	0	1.298	118.4	14.92	2.646	945
1174	18/04/2018 21:00:00	0	21.72	72.41	0	1.796	133	13.28	3.136	945
1175	18/04/2018 22:00:00	0	20.6	71.46	0	1.07	144.7	22.91	2.352	945
1176	18/04/2018 23:00:00	0	19.05	79.43	0	0.878	163	20.14	1.764	945
1177	19/04/2018 00:00:00	0	17.88	81.5	0	0.727	265	33.74	1.862	945
1178	19/04/2018 01:00:00	0	17.46	84.2	0	1.817	292.5	8.52	2.548	944
1179	19/04/2018 02:00:00	0	17.12	84.6	0	1.503	308.4	13.09	2.744	944
1180	19/04/2018 03:00:00	0	16.51	78.29	0	2.204	284.3	15.16	3.528	944
1181	19/04/2018 04:00:00	0	17.42	75.16	0	2.185	273.2	12.35	3.332	944
1182	19/04/2018 05:00:00	0	17.54	78.73	0	2.541	278.4	11.56	4.018	944
1183	19/04/2018 06:00:00	0	16.95	73.62	0	2.457	275.4	11.13	4.802	944
1184	19/04/2018 07:00:00	35.1343	18.23	68.77	0	2.494	274.8	11.38	4.312	944
1185	19/04/2018 08:00:00	230.076	21.13	60.17	0	2.651	279.4	12.4	4.9	945
1186	19/04/2018 09:00:00	456.135	24.19	52.77	0	3.678	295.4	15.09	6.37	945
1187	19/04/2018 10:00:00	650.851	27.09	44.88	0	3.144	299.2	15.86	5.978	945
1188	19/04/2018 11:00:00	786.115	29.38	41.88	0	2.482	280.2	29.15	5.586	945
1189	19/04/2018 12:00:00	852.895	30.42	41.99	0	2.683	258.1	26.43	5.488	944
1190	19/04/2018 13:00:00	853.949	31.56	35.02	0	2.633	281.8	30.08	5.782	943
1191	19/04/2018 14:00:00	771.501	32.62	32.18	0	1.784	263.3	47.34	4.018	942
1192	19/04/2018 15:00:00	624.841	33.3	30.72	0	1.534	297.1	37.92	4.018	942
1193	19/04/2018 16:00:00	429.996	33.63	29.67	0	1.083	344.8	36.42	3.234	941
1194	19/04/2018 17:00:00	206.479	32.49	38.58	0	1.336	17.16	36.21	3.626	941
1195	19/04/2018 18:00:00	23.9875	28.7	47.9	0	1.462	46.92	29.95	4.018	941
1196	19/04/2018 19:00:00	0	25.16	60.55	0	0.703	105.5	37.96	1.666	942
1197	19/04/2018 20:00:00	0	23.35	65.11	0	0.563	172	19.71	1.274	942
1198	19/04/2018 21:00:00	0	22.21	65.15	0	1.25	244.7	39.11	1.862	943
1199	19/04/2018 22:00:00	0	23.57	53.52	0	3.192	197.6	27.9	9.02	944
1200	19/04/2018 23:00:00	0	23.3	76.34	0	4.966	163.8	17.02	10.88	945
1201	20/04/2018 00:00:00	0	21.86	81.2	0	1.256	151.4	52.76	6.174	946
1202	20/04/2018 01:00:00	0	21.53	83.4	0	2.178	147.5	31.7	6.076	946
1203	20/04/2018 02:00:00	0	21.15	83.7	0	2.662	137.1	15.32	5.488	947
1204	20/04/2018 03:00:00	0	20.93	81.7	0	3.197	140.9	17.06	5.978	947
1205	20/04/2018 04:00:00	0	20.61	83.9	0	3.987	144.6	17.28	8.33	947
1206	20/04/2018 05:00:00	0	20.17	85.4	0	3.689	140.3	16.11	7.154	947
1207	20/04/2018 06:00:00	0	19.99	86.2	0	3.96	146.4	15.6	7.546	947
1208	20/04/2018 07:00:00	20.1532	19.86	85.6	0	2.549	147	42.24	8.04	947
1209	20/04/2018 08:00:00	24.6526	20.02	85.9	0	1.859	156.2	29.54	4.116	948
1210	20/04/2018 09:00:00	293.024	21.11	70.52	0	2.335	157.7	19.08	5.194	949
1211	20/04/2018 10:00:00	402.021	22.03	70.02	0	3.208	159.5	22.05	5.978	949
1212	20/04/2018 11:00:00	321.153	22.13	72.32	0	2.894	138.1	18.95	6.566	949
1213	20/04/2018 12:00:00	311.917	22.38	69.3	0	2.127	139	25.75	4.9	948
1214	20/04/2018 13:00:00	251.48	22.15	66.18	0	1.858	164.3	25.06	4.018	947
1215	20/04/2018 14:00:00	359.425	23.27	68.6	0	2.309	152.3	22.88	4.998	946
1216	20/04/2018 15:00:00	201.254	23.13	69.22	0	2.008	155.2	21.46	4.018	946
1217	20/04/2018 16:00:00	143.045	23.13	64.95	0	1.272	125.5	32.37	2.94	946
1218	20/04/2018 17:00:00	175.93	23.96	65.01	0	1.278	71.81	29.73	3.724	946
1219	20/04/2018 18:00:00	29.7159	22.65	73.66	0	1.313	49.98	16.15	2.744	946
1220	20/04/2018 19:00:00	0	21.1	78.34	0	0.588	86.5	51.45	1.568	946
1221	20/04/2018 20:00:00	0	20.59	79.14	0	0.557	220.3	40.33	1.176	947
1222	20/04/2018 21:00:00	0	19.68	84.9	0	0.473	233.7	12.73	1.176	947
1223	20/04/2018 22:00:00	0	19.73	81.8	0	1.236	208.9	22.31	2.744	948
1224	20/04/2018 23:00:00	0.00535963	20.01	83	0	0.957	223	21.72	1.862	948
1225	21/04/2018 00:00:00	0	19.89	87.6	0	0.642	282.6	43.95	1.47	947
1226	21/04/2018 01:00:00	0	19.12	88.2	0	0.664	288.7	30.83	2.254	947
1227	21/04/2018 02:00:00	0	19.59	85.9	0	0.655	102.6	52.47	1.372	947
1228	21/04/2018 03:00:00	0	19.77	86.7	0	0.701	161.8	28.38	1.96	947
1229	21/04/2018 04:00:00	0	19.67	89.9	0	1.395	136.5	19.36	3.234	947
1230	21/04/2018 05:00:00	0	19.35	89.6	0	1.788	134.3	15.44	3.626	947
1231	21/04/2018 06:00:00	0	18.91	91.7	0	2.292	121.4	15.7	4.312	947
1232	21/04/2018 07:00:00	13.4666	18.63	90.2	0	2.331	122.7	12.95	4.214	948
1233	21/04/2018 08:00:00	91.7982	19	84.6	0	2.203	126	14.11	4.018	948
1234	21/04/2018 09:00:00	163.356	20.05	82.6	0	2.175	105.8	18.44	3.822	948
1235	21/04/2018 10:00:00	165.66	20.4	78.71	0	2.001	113.8	21.05	3.528	949
1236	21/04/2018 11:00:00	234.301	21.74	72.93	0	0.696	70.67	39.49	1.96	948
1237	21/04/2018 12:00:00	236.875	22.16	74.64	0	1.25	28.62	24.88	2.744	948
1238	21/04/2018 13:00:00	332.555	23.09	67	0	0.819	30.53	54.55	2.45	947
1239	21/04/2018 14:00:00	325.46	23.98	64.34	0	0.86	308.1	57.76	2.058	946
1240	21/04/2018 15:00:00	177.972	23.75	65.91	0	0.69	341.8	64.75	2.058	946
1241	21/04/2018 16:00:00	142.111	23.56	69.88	0	1.018	5.371	33.97	2.548	946
1242	21/04/2018 17:00:00	43.3955	22.69	73.47	0	1.316	10.34	13.53	2.058	946
1243	21/04/2018 18:00:00	7.31207	22.02	77.29	0	1.097	54.57	27.31	3.038	945
1244	21/04/2018 19:00:00	0	20.55	85.3	0	0.759	33.8	42.45	1.372	945
1245	21/04/2018 20:00:00	0	19.08	91.5	0	0.459	28.57	48.9	1.568	945
1246	21/04/2018 21:00:00	0	18.31	92	0	0.871	257.8	32.08	1.372	946
1247	21/04/2018 22:00:00	0	17.75	94.1	0	1.57	273.5	11.18	2.744	946
1248	21/04/2018 23:00:00	0	17.12	95.2	0	1.454	291.3	13.47	2.744	946
1249	22/04/2018 00:00:00	0	16.58	96	0	1.351	270	19.35	2.156	946
1250	22/04/2018 01:00:00	0	16.59	95.5	0	1.725	276.2	13.73	2.94	945
1251	22/04/2018 02:00:00	0	16.25	96.4	0	2.16	285.2	9.14	2.94	945
1252	22/04/2018 03:00:00	0	16.04	96.2	0	2.007	274.1	13.16	3.528	945
1253	22/04/2018 04:00:00	0	15.5	97	0	1.04	280.3	28.06	2.156	945
1254	22/04/2018 05:00:00	0	14.84	97.8	0	1.573	296.4	14.19	2.94	945
1255	22/04/2018 06:00:00	0	14.67	98	0	1.733	286.8	9.44	3.332	945
1256	22/04/2018 07:00:00	31.3054	15.23	93.8	0	2.167	278.1	13.77	4.41	946
1257	22/04/2018 08:00:00	202.613	17.98	83.9	0	2.425	281.4	15.23	4.508	946
1258	22/04/2018 09:00:00	414.397	21.15	73.93	0	2.738	292.2	17.02	5.096	947
1259	22/04/2018 10:00:00	606.334	24.09	63.54	0	2.563	297.6	18.54	4.9	947
1260	22/04/2018 11:00:00	742.263	26.19	56.51	0	2.04	321.7	29.21	4.998	946
1261	22/04/2018 12:00:00	664.672	27.69	55.62	0	1.343	39.13	57.75	3.43	946
1262	22/04/2018 13:00:00	788.012	29.1	45.41	0	1.344	0.649	52.71	3.822	945
1263	22/04/2018 14:00:00	780.113	30.56	41.56	0	1.204	67.05	42.79	3.234	944
1264	22/04/2018 15:00:00	660.347	30.73	42.3	0	1.299	18.57	36.62	3.724	944
1265	22/04/2018 16:00:00	469.944	30.4	44.37	0	2.208	35	32.26	5.292	944
1266	22/04/2018 17:00:00	192.651	28.99	50.78	0	2.159	53.82	20.55	4.704	944
1267	22/04/2018 18:00:00	18.2261	25.92	62.21	0	1.562	77.93	16.81	3.234	944
1268	22/04/2018 19:00:00	0	23.04	73.14	0	0.827	98.7	35.38	1.666	944
1269	22/04/2018 20:00:00	0	21.94	71.65	0	0.797	112.4	47.58	1.764	945
1270	22/04/2018 21:00:00	0	21.45	77.46	0	0.823	145.2	14.47	1.372	946
1271	22/04/2018 22:00:00	0	20.58	79.84	0	0.84	144.8	14.72	1.372	946
1272	22/04/2018 23:00:00	0	19.53	83.8	0	1.182	270.6	37.31	2.156	946
1273	23/04/2018 00:00:00	0	20.41	78.63	0	1.771	221.2	16.72	3.43	946
1274	23/04/2018 01:00:00	0	18.96	90.6	0	1.364	304.3	30.81	3.234	946
1275	23/04/2018 02:00:00	0	17.51	91.5	0	2.242	281	10.69	3.43	946
1276	23/04/2018 03:00:00	0	17.26	92.7	0	1.7	270.7	9.11	2.94	946
1277	23/04/2018 04:00:00	0	16.8	94.5	0	1.092	265	8.05	1.96	946
1278	23/04/2018 05:00:00	0	17.18	93.3	0	1.555	253.3	11.68	2.254	946
1279	23/04/2018 06:00:00	0	16.82	95	0	1.153	278.1	9.79	1.862	946
1280	23/04/2018 07:00:00	31.1783	16.67	91.4	0	0.954	287.4	14.5	1.764	947
1281	23/04/2018 08:00:00	206.767	19.81	79.98	0	1.252	298.8	11.28	2.156	948
1282	23/04/2018 09:00:00	414.946	23.17	66.98	0	0.812	290.9	36.98	1.862	948
1283	23/04/2018 10:00:00	606.461	25.56	58.37	0	0.773	317.9	45.5	2.45	948
1284	23/04/2018 11:00:00	743.161	27.56	54.77	0	0.847	42.61	71.29	2.254	948
1285	23/04/2018 12:00:00	814.91	29.03	50.16	0	1.248	35.85	39.46	3.626	947
1286	23/04/2018 13:00:00	800.207	29.76	44.01	0	1.352	46.44	64.12	3.724	946
1287	23/04/2018 14:00:00	777.414	31.05	38.58	0	1.718	39.67	47.36	4.41	945
1288	23/04/2018 15:00:00	610.51	31.49	37.61	0	1.643	16.64	49.95	4.018	945
1289	23/04/2018 16:00:00	406.75	31.18	38.52	0	1.857	32.46	31.63	4.41	945
1290	23/04/2018 17:00:00	185.068	30.07	50.26	0	2.094	41.47	18.92	4.018	945
1291	23/04/2018 18:00:00	18.4188	26.57	63.36	0	1.529	64	16.42	3.234	945
1292	23/04/2018 19:00:00	0	23.81	69.74	0	0.926	91.6	18.76	2.058	945
1293	23/04/2018 20:00:00	0	22.99	74.23	0	0.891	121.9	13.85	1.666	946
1294	23/04/2018 21:00:00	0	21.85	78.4	0	0.746	131.7	11.98	1.274	946
1295	23/04/2018 22:00:00	0	21.87	77.82	0	1.2	147.4	9.37	1.96	947
1296	23/04/2018 23:00:00	0	20.66	85.9	0	0.798	162.5	35.91	1.764	947
1297	24/04/2018 00:00:00	0	19.41	89.9	0	0.205	206.2	28.56	1.078	947
1298	24/04/2018 01:00:00	0	18.85	91.9	0	1.107	189.5	62.12	1.96	947
1299	24/04/2018 02:00:00	0	17.7	93	0	0.868	279.9	17.79	1.47	947
1300	24/04/2018 03:00:00	0	17.39	89.8	0	1.477	267.7	16.44	3.43	946
1301	24/04/2018 04:00:00	0	18.17	94	0	1.681	273.5	18.2	2.646	946
1302	24/04/2018 05:00:00	0	17.01	94.2	0	1.7	269.7	21.19	2.548	946
1303	24/04/2018 06:00:00	0	17.23	91.3	0	1.378	237.6	20.91	2.45	947
1304	24/04/2018 07:00:00	30.8524	16.89	87.9	0	1.127	289.2	12.29	2.058	947
1305	24/04/2018 08:00:00	206.953	20.02	75.31	0	1.699	281.1	12.39	2.842	948
1306	24/04/2018 09:00:00	433.048	23.28	62.97	0	1.882	291.8	15.74	3.038	948
1307	24/04/2018 10:00:00	621.78	26.29	52.93	0	1.346	304.9	24.89	2.94	948
1308	24/04/2018 11:00:00	754.355	28.15	48.38	0	1.131	303.3	38.95	3.332	948
1309	24/04/2018 12:00:00	824.31	29.48	42.85	0	1.64	288.4	53.89	4.214	947
1310	24/04/2018 13:00:00	833.956	30.76	33.97	0	1.717	284.5	57.51	4.41	946
1311	24/04/2018 14:00:00	753.386	31.88	31.38	0	1.659	228.4	58.54	4.606	945
1312	24/04/2018 15:00:00	606.297	32.65	25.32	0	2.118	206.4	51.94	5.292	945
1313	24/04/2018 16:00:00	421.199	32.83	25.93	0	1.759	141.6	27.69	4.312	945
1314	24/04/2018 17:00:00	186.669	31.41	44.75	0	2.168	62.7	28.85	4.508	945
1315	24/04/2018 18:00:00	18.0705	27.29	60.06	0	1.219	65.21	18.69	3.136	946
1316	24/04/2018 19:00:00	0	24.2	68.79	0	0.949	103.9	26.17	2.058	946
1317	24/04/2018 20:00:00	0	22.97	67.87	0	1.196	148.5	11.24	2.156	947
1318	24/04/2018 21:00:00	0	21.48	74.67	0	0.87	160.4	17.63	1.862	947
1319	24/04/2018 22:00:00	0	21.5	66.13	0	1.788	143.3	12.38	3.724	948
1320	24/04/2018 23:00:00	0	21.83	69.61	0	1.696	133.5	15.62	3.038	948
1321	25/04/2018 00:00:00	0	20.57	72.04	0	1.563	139.7	9.85	2.646	948
1322	25/04/2018 01:00:00	0	19.2	85.1	0	1.168	184.9	63.86	2.352	948
1323	25/04/2018 02:00:00	0	16.84	86.4	0	1.135	274.8	15.81	2.058	948
1324	25/04/2018 03:00:00	0	16.6	87.6	0	1.36	281	14.37	2.646	947
1325	25/04/2018 04:00:00	0	16.16	88	0	1.111	290.6	10.14	1.666	947
1326	25/04/2018 05:00:00	0	16.08	88.4	0	1.322	286.1	6.102	1.862	948
1327	25/04/2018 06:00:00	0	15.92	90.2	0	1.057	290.2	10.33	1.666	948
1328	25/04/2018 07:00:00	31.3166	16.03	82.3	0	0.663	253.5	44.45	1.568	948
1329	25/04/2018 08:00:00	214.692	20.72	71.79	0	0.806	333.7	21.35	2.254	949
1330	25/04/2018 09:00:00	432.467	22.68	61	0	1.229	330.5	23.43	2.352	950
1331	25/04/2018 10:00:00	620.71	26.08	51.13	0	0.813	115.2	49.64	2.45	950
1332	25/04/2018 11:00:00	722.105	27.6	46.27	0	1.498	112.3	50.31	4.998	950
1333	25/04/2018 12:00:00	800.564	28.43	40.89	0	2.394	123	33.16	6.664	949
1334	25/04/2018 13:00:00	836.178	29.49	38.86	0	2.516	123.3	36.42	6.958	948
1335	25/04/2018 14:00:00	749.009	30.32	38.69	0	1.846	103.7	36.09	4.998	947
1336	25/04/2018 15:00:00	602.761	31.04	36.42	0	2.074	74.06	33.36	5.782	947
1337	25/04/2018 16:00:00	408.577	30.29	44.03	0	2.769	58.6	28.16	5.978	947
1338	25/04/2018 17:00:00	188.119	28.59	48.24	0	2.727	39.06	16.72	5.194	947
1339	25/04/2018 18:00:00	17.7742	24.94	62.53	0	1.383	9.55	21.12	4.018	947
1340	25/04/2018 19:00:00	0	22.39	69.06	0	0.614	251.4	34.92	1.568	948
1341	25/04/2018 20:00:00	0	21.38	67.12	0	1.335	192.2	11.41	1.862	948
1342	25/04/2018 21:00:00	0	20.86	66.58	0	1.36	141.8	15.39	2.352	948
1343	25/04/2018 22:00:00	0	20.95	60.74	0	2.009	141.4	8.34	2.94	949
1344	25/04/2018 23:00:00	0	20	66.73	0	1.665	128.3	7.303	2.842	949
1345	26/04/2018 00:00:00	0	17.25	82.5	0	0.515	246.2	41.69	1.666	948
1346	26/04/2018 01:00:00	0	16.29	82.9	0	1.019	263.5	12.5	1.764	948
1347	26/04/2018 02:00:00	0	15.55	87.7	0	0.687	263.6	19.16	1.568	948
1348	26/04/2018 03:00:00	0	14.71	91.6	0	0.933	280.6	24.4	1.666	947
1349	26/04/2018 04:00:00	0	14.31	91.7	0	1.156	287.7	8.93	1.764	947
1350	26/04/2018 05:00:00	0	14.11	90.6	0	0.914	244.7	13.95	2.058	947
1351	26/04/2018 06:00:00	0	13.97	93.6	0	1.208	287.2	20.09	2.45	947
1352	26/04/2018 07:00:00	32.0727	15.1	82.2	0	1.406	286.4	67.26	3.136	948
1353	26/04/2018 08:00:00	229.998	18.53	69.52	0	1.646	304.9	12.27	3.234	949
1354	26/04/2018 09:00:00	458.469	21.98	57.56	0	2.198	297.8	13.89	3.528	949
1355	26/04/2018 10:00:00	645.164	25.1	44.27	0	1.567	301.3	33.2	3.332	950
1356	26/04/2018 11:00:00	778.605	26.79	41.41	0	1.746	21.83	36.93	4.508	949
1357	26/04/2018 12:00:00	845.022	27.93	35.04	0	1.445	49.79	49.1	3.626	949
1358	26/04/2018 13:00:00	838.708	29.04	32.56	0	1.756	37.02	38.98	4.41	947
1359	26/04/2018 14:00:00	765.579	29.71	29.58	0	1.572	35.73	60.12	4.312	947
1360	26/04/2018 15:00:00	612.743	30.4	33.62	0	1.569	10.19	37.98	3.92	946
1361	26/04/2018 16:00:00	414.043	30.53	33.29	0	1.456	41.68	31.24	3.528	945
1362	26/04/2018 17:00:00	190.99	29.58	40.48	0	1.43	65.52	24.05	3.528	945
1363	26/04/2018 18:00:00	16.3235	25.19	51.76	0	1.453	57.19	14.82	2.646	946
1364	26/04/2018 19:00:00	0	21.84	62.58	0	1.336	55.84	14.12	2.744	946
1365	26/04/2018 20:00:00	0	20.96	66.22	0	1.134	69.48	22.18	2.548	946
1366	26/04/2018 21:00:00	0	20.1	64.78	0	1.301	146.2	11.5	1.96	947
1367	26/04/2018 22:00:00	0	19.42	74.97	0	1.384	169.9	49.67	2.156	947
1368	26/04/2018 23:00:00	0	16.79	82.8	0	1.394	281.6	17.61	3.038	947
1369	27/04/2018 00:00:00	0	17.09	77.26	0	2.186	268.2	9.38	3.528	947
1370	27/04/2018 01:00:00	0	16.31	84.9	0	0.885	264.4	42.05	2.45	946
1371	27/04/2018 02:00:00	0	14.85	87.8	0	2.205	288.5	12.64	3.822	946
1372	27/04/2018 03:00:00	0	14.47	87.6	0	1.325	291.8	22.4	3.822	946
1373	27/04/2018 04:00:00	0	14.14	85	0	1.749	287	20.74	3.234	946
1374	27/04/2018 05:00:00	0	13.78	78.23	0	1.813	281.2	14.41	4.606	946
1375	27/04/2018 06:00:00	0	13.89	83.9	0	3.302	282.4	11.56	4.802	946
1376	27/04/2018 07:00:00	31.8388	13.92	73.31	0	2.585	276.1	13.64	4.116	947
1377	27/04/2018 08:00:00	229.143	18.72	57.61	0	2.442	283	16.96	4.9	948
1378	27/04/2018 09:00:00	453.294	22.25	46.9	0	2.819	300.5	17.46	5.88	948
1379	27/04/2018 10:00:00	640.744	25.89	39.19	0	2.596	305.2	19.71	4.704	948
1380	27/04/2018 11:00:00	772.653	28.37	31.12	0	1.972	308.1	26.66	3.724	948
1381	27/04/2018 12:00:00	835.648	30.43	28.33	0	1.609	322.8	72.52	3.822	947
1382	27/04/2018 13:00:00	828.902	31.82	22.35	0	2.105	149	39.32	5.88	946
1383	27/04/2018 14:00:00	755.409	32.76	19.37	0	2.908	120.3	24.75	6.468	945
1384	27/04/2018 15:00:00	612.247	33.11	20.4	0	2.681	147.8	29.17	5.782	945
1385	27/04/2018 16:00:00	413.38	32.74	22.03	0	2.646	120	26.56	5.194	945
1386	27/04/2018 17:00:00	184.168	31.21	35.17	0	2.381	93.5	22.44	5.684	945
1387	27/04/2018 18:00:00	14.8398	26.82	45.15	0	1.5	90.8	31.01	2.94	945
1388	27/04/2018 19:00:00	0	23.81	54.26	0	1.167	119.4	24.06	2.156	946
1389	27/04/2018 20:00:00	0	22.25	53.11	0	1.657	159.3	11.62	3.528	947
1390	27/04/2018 21:00:00	0	22.24	39.95	0	1.548	158.1	13.14	3.92	947
1391	27/04/2018 22:00:00	0	22.14	51.36	0	1.782	142.6	14.62	3.332	948
1392	27/04/2018 23:00:00	0	21.51	61.35	0	1.87	138.3	12.26	3.332	948
1393	28/04/2018 00:00:00	0	18.72	69.65	0	0.886	293.1	41.51	1.96	948
1394	28/04/2018 01:00:00	0	16.76	73.24	0	1.035	283.2	16.75	2.45	949
1395	28/04/2018 02:00:00	0	17.05	80.9	0	1.153	173.4	45.4	2.548	948
1396	28/04/2018 03:00:00	0	15.74	88	0	0.239	342	34.72	0.882	948
1397	28/04/2018 04:00:00	0	14.76	89.2	0	0.749	270.6	6.251	1.47	948
1398	28/04/2018 05:00:00	0	14.99	94.8	0	1.337	280.6	9.72	2.254	948
1399	28/04/2018 06:00:00	0	14.61	95.6	0	1.342	284.2	7.515	2.254	948
1400	28/04/2018 07:00:00	32.8931	15.31	90.9	0	1.805	263.2	14.61	3.038	949
1401	28/04/2018 08:00:00	101.487	18.32	89.3	0	1.629	266.2	16.25	3.136	950
1402	28/04/2018 09:00:00	336.697	20.34	75.35	0	2.255	267.9	21.43	4.018	950
1403	28/04/2018 10:00:00	628.304	23	61.32	0	1.778	265.1	30.72	3.724	951
1404	28/04/2018 11:00:00	766.647	25.4	50.71	0	1.386	280.2	46.33	4.116	950
1405	28/04/2018 12:00:00	839.186	27.59	34.73	0	1.548	33.8	54.72	3.626	949
1406	28/04/2018 13:00:00	830.577	29.58	29.41	0	1.444	30.54	57.54	3.92	948
1407	28/04/2018 14:00:00	752.847	30.58	25.89	0	1.223	357.4	69.42	3.234	947
1408	28/04/2018 15:00:00	604.439	31.79	25.17	0	1.303	63.23	55.54	3.234	947
1409	28/04/2018 16:00:00	410.97	31.44	24.77	0	1.269	318.2	49.77	4.018	947
1410	28/04/2018 17:00:00	190.997	31.17	24.72	0	0.751	282.1	31.53	2.058	947
1411	28/04/2018 18:00:00	14.0099	25.9	46.39	0	0.904	57.03	23.01	2.646	947
1412	28/04/2018 19:00:00	0	22.14	54.28	0	0.462	140.5	58.02	2.058	948
1413	28/04/2018 20:00:00	0	21.73	66	0	1.383	158.8	10.31	2.646	948
1414	28/04/2018 21:00:00	0	19.53	70.77	0	0.768	256.3	47.49	1.764	949
1415	28/04/2018 22:00:00	0	17.55	67.47	0	1.324	267.4	11.31	2.156	949
1416	28/04/2018 23:00:00	0	17.61	70.24	0	1.203	270.2	11.89	1.96	948
1417	29/04/2018 00:00:00	0	16.29	77.71	0	1.251	279.7	8.83	2.352	948
1418	29/04/2018 01:00:00	0	15.6	67.8	0	1.232	283.5	14.83	1.862	948
1419	29/04/2018 02:00:00	0	15.31	70.63	0	1.203	298.9	8.07	2.058	948
1420	29/04/2018 03:00:00	0	15.03	67	0	1.686	295.3	11.79	3.528	948
1421	29/04/2018 04:00:00	0	15.59	64.95	0	2.519	275.1	8.56	3.822	947
1422	29/04/2018 05:00:00	0	15.18	68.41	0	2.132	274.3	29.09	3.724	947
1423	29/04/2018 06:00:00	0	14.54	73.75	0	0.727	231.2	49.59	3.234	948
1424	29/04/2018 07:00:00	26.9772	14.75	60.16	0	1.156	192.8	66.22	5.39	949
1425	29/04/2018 08:00:00	152.204	18.41	75.45	0	2.258	200.8	50.12	6.566	951
1426	29/04/2018 09:00:00	82.5553	18.41	77.14	0	1.874	249.2	40.56	4.018	952
1427	29/04/2018 10:00:00	181.476	19.65	77.57	0	1.252	194.5	44.36	2.842	952
1428	29/04/2018 11:00:00	538.814	22.61	63.96	0	1.391	155.4	41.59	3.234	952
1429	29/04/2018 12:00:00	675.889	25.16	62.61	0	1.682	229.5	50.57	4.312	951
1430	29/04/2018 13:00:00	616.677	26.08	49.7	0	1.885	170	36.64	5.684	950
1431	29/04/2018 14:00:00	547.801	27.17	49.12	0	2.756	159.2	27.03	6.37	949
1432	29/04/2018 15:00:00	419.274	27.17	46.34	0	3.156	165.1	23.78	6.566	949
1433	29/04/2018 16:00:00	328.721	27.28	46.76	0	3.344	149.6	21.84	6.762	949
1434	29/04/2018 17:00:00	141.531	26.33	49.33	0	2.88	157.1	16.05	5.684	949
1435	29/04/2018 18:00:00	12.173	24.41	56.69	0	2.12	161.2	15.46	5.978	949
1436	29/04/2018 19:00:00	0	23.26	59.47	0	2.337	156.1	14.88	5.292	950
1437	29/04/2018 20:00:00	0	22.83	64.84	0	2.759	147.9	13.95	4.998	950
1438	29/04/2018 21:00:00	0	22.13	68.72	0	2.678	145.4	16.45	5.978	951
1439	29/04/2018 22:00:00	0	21.07	75.89	0	1.472	113.1	46.77	3.626	951
1440	29/04/2018 23:00:00	0	19.38	82.6	0	1.02	79.26	62.51	2.842	951
1441	30/04/2018 00:00:00	0	17.76	88.1	0	0.46	232.7	17.6	0.98	951
1442	30/04/2018 01:00:00	0	17.61	89.9	0	0.966	207.3	19.67	1.764	951
1443	30/04/2018 02:00:00	0	17.33	89	0	1.242	224.2	12.15	1.764	951
1444	30/04/2018 03:00:00	0	16.66	92.4	0	1.139	245.5	12	1.96	950
1445	30/04/2018 04:00:00	0	15.73	94.4	0	0.933	287.8	16.31	1.862	950
1446	30/04/2018 05:00:00	0	16.04	91.7	0	1.189	287	12.37	2.45	950
1447	30/04/2018 06:00:00	0	17.23	90.7	0	0.832	288.1	17.08	2.058	950
1448	30/04/2018 07:00:00	24.4186	17.12	87.6	0	1.15	286.6	16.66	2.45	950
1449	30/04/2018 08:00:00	225.806	20.24	74.61	0	0.991	291.7	15.71	1.96	951
1450	30/04/2018 09:00:00	433.812	23.07	67.77	0	0.911	84.3	57.27	2.254	952
1451	30/04/2018 10:00:00	495.539	23.15	58.74	0	1.606	128.1	30.99	3.43	952
1452	30/04/2018 11:00:00	510.28	24.64	56.08	0	1.177	166.6	53.98	3.332	952
1453	30/04/2018 12:00:00	793.497	26.45	46.79	0	1.484	136.8	43.57	4.312	951
1454	30/04/2018 13:00:00	546.341	26.49	48.66	0	2.402	134.7	29.75	5.39	950
1455	30/04/2018 14:00:00	492.069	26.95	47.48	0	2.194	130.8	31.41	9.7	950
1456	30/04/2018 15:00:00	369.613	27.01	44.71	0	2.663	119.4	20.67	6.272	949
1457	30/04/2018 16:00:00	324.785	27.34	45.51	0	3.312	130.8	21.23	6.076	950
1458	30/04/2018 17:00:00	160.57	26.56	47.27	0	3.689	150.3	16.06	7.252	950
1459	30/04/2018 18:00:00	10.4889	24.53	52.82	0	2.382	156.8	15.25	5.194	950
1460	30/04/2018 19:00:00	0	23.68	58.74	0	2.889	154.4	14.69	8.53	950
1461	30/04/2018 20:00:00	0	23.5	61.83	0	4.458	153.5	16.17	9.7	951
1462	30/04/2018 21:00:00	0	21.93	74.38	0	5.018	165.3	17.5	10.09	952
1463	30/04/2018 22:00:00	0	20.67	77.22	0	5.919	158.8	16.54	10.98	953
1464	30/04/2018 23:00:00	0	19.85	78.38	0	4.874	156.7	15.3	10.98	953
1465	01/05/2018 00:00:00	0	19.47	79.96	0	3.719	155.2	17.82	7.938	953
1466	01/05/2018 01:00:00	0	19.21	81.3	0	3.613	158.9	17.17	7.154	953
1467	01/05/2018 02:00:00	0	18.94	82.6	0	3.591	165.3	17.89	6.958	953
1468	01/05/2018 03:00:00	0	18.8	82.4	0	2.304	179.8	21.34	6.37	953
1469	01/05/2018 04:00:00	0	18.74	81.9	0	1.903	179.6	21.85	3.822	953
1470	01/05/2018 05:00:00	0	18.67	82	0	1.814	173.7	18.81	3.822	953
1471	01/05/2018 06:00:00	0	18.67	81.7	0	2.252	156.9	18.15	5.684	953
1472	01/05/2018 07:00:00	7.18245	18.53	81.3	0	2.549	151.5	17.75	5.292	953
1473	01/05/2018 08:00:00	87.8487	18.95	76.21	0	3.256	152	17.3	7.252	954
1474	01/05/2018 09:00:00	181.126	19.8	70.19	0	3.586	152.3	17.81	8.13	954
1475	01/05/2018 10:00:00	251.203	20.73	65.15	0	3.413	160.5	22.36	6.762	955
1476	01/05/2018 11:00:00	269.6	21.64	63.16	0	2.373	150.2	26.22	6.37	954
1477	01/05/2018 12:00:00	241.873	22.27	61.36	0	2.018	159.4	35.02	5.194	954
1478	01/05/2018 13:00:00	322.159	23.55	54.88	0	1.053	271.2	48.08	4.214	953
1479	01/05/2018 14:00:00	251.655	24.3	50.47	0	1.422	177.1	36.08	3.92	952
1480	01/05/2018 15:00:00	341.918	24.59	57.77	0	2.04	299.2	55.83	4.802	951
1481	01/05/2018 16:00:00	253.375	24.04	57.73	0	2.242	333.4	18.26	4.312	950
1482	01/05/2018 17:00:00	92.4144	23.89	59.01	0	1.108	291.3	47.15	2.548	950
1483	01/05/2018 18:00:00	8.63572	21.82	70	0	0.587	248.2	21.82	1.862	950
1484	01/05/2018 19:00:00	0	20.88	66.84	0	1.227	196.6	11.8	4.704	951
1485	01/05/2018 20:00:00	0	21.12	72.13	0	2.319	181.8	23.54	4.704	951
1486	01/05/2018 21:00:00	0	20.86	73.82	0	3.178	161.2	15.04	6.468	952
1487	01/05/2018 22:00:00	0	20.29	77.67	0	2.986	158.2	16.21	5.978	952
1488	01/05/2018 23:00:00	0	19.81	80.4	0	1.775	150.5	16.19	4.116	952
1489	02/05/2018 00:00:00	0	19.28	82.8	0	0.605	24.75	54.95	1.862	952
1490	02/05/2018 01:00:00	0	19.13	84.1	0	0.394	321.3	15.71	1.078	952
1491	02/05/2018 02:00:00	0	18.67	87.6	0	0.562	263.8	14.72	1.078	951
1492	02/05/2018 03:00:00	0	18.12	89.9	0	0.393	262.2	9.02	1.568	951
1493	02/05/2018 04:00:00	0	17.36	93.4	0	1.18	261.5	20.37	2.058	950
1494	02/05/2018 05:00:00	0	17.31	89.7	0	1.167	186.1	31.42	3.528	950
1495	02/05/2018 06:00:00	0	16.77	94.9	0	1.263	271.3	24.37	2.352	950
1496	02/05/2018 07:00:00	14.6812	16.68	93	0	1.789	271.9	16.7	3.038	950
1497	02/05/2018 08:00:00	198.532	19.47	75.95	0	1.462	294.5	25.48	3.038	950
1498	02/05/2018 09:00:00	309.503	21.23	68.21	0	1.528	236.8	40.15	3.43	951
1499	02/05/2018 10:00:00	396.15	23.04	68.38	0	1.225	210.9	43.1	3.528	950
1500	02/05/2018 11:00:00	388.561	23.04	54.18	0	1.577	190.4	34.71	3.528	950
1501	02/05/2018 12:00:00	543.415	24.89	56.37	0	1.334	265.5	35.48	3.038	949
1502	02/05/2018 13:00:00	603.11	26.25	47.79	0	1.058	12.26	41.37	3.234	948
1503	02/05/2018 14:00:00	451.1	26.31	45.21	0	1.51	163.2	61.68	4.704	947
1504	02/05/2018 15:00:00	557.135	28.4	40.18	0	0.82	219.7	53.44	2.548	946
1505	02/05/2018 16:00:00	378.515	28.49	43.09	0	1.424	43.28	49.6	3.822	946
1506	02/05/2018 17:00:00	161.948	27.55	50.06	0	1.216	0.982	35.93	3.136	946
1507	02/05/2018 18:00:00	10.408	23.57	65.26	0	0.979	10.32	18.67	2.548	946
1508	02/05/2018 19:00:00	0	21.02	72.91	0	1.179	298.7	42.89	2.94	947
1509	02/05/2018 20:00:00	0	20.49	65.09	0	2.402	251	17.74	5.096	948
1510	02/05/2018 21:00:00	0	19.55	67.13	0	1.588	235.2	34.58	4.606	948
1511	02/05/2018 22:00:00	0	17.7	73.61	0	2.236	290.2	23.14	3.626	948
1512	02/05/2018 23:00:00	0	17.66	75.11	0	2.133	269.3	13.97	3.038	948
1513	03/05/2018 00:00:00	0	17.06	75.46	0	2.47	266.2	13.89	3.43	947
1514	03/05/2018 01:00:00	0	16.54	82	0	2.55	277.7	17.47	4.802	947
1515	03/05/2018 02:00:00	0	16.25	79.21	0	3.043	284.2	11.13	4.606	946
1516	03/05/2018 03:00:00	0	15.4	87	0	2.213	275.9	12.19	4.116	946
1517	03/05/2018 04:00:00	0	14.72	86.7	0	2.211	286.6	15.28	3.332	946
1518	03/05/2018 05:00:00	0	15.15	80.8	0	2.644	272.3	17.41	4.802	945
1519	03/05/2018 06:00:00	0	15.96	83.4	0	2.806	273.8	14.95	4.998	945
1520	03/05/2018 07:00:00	23.1873	16.22	77.34	0	2.305	283.8	13.84	5.488	946
1521	03/05/2018 08:00:00	201.928	19.08	64.67	0	3.713	285.6	13.97	6.86	947
1522	03/05/2018 09:00:00	417.322	21.93	55.85	0	3.905	289.2	12.94	6.86	947
1523	03/05/2018 10:00:00	602.881	25.36	43.57	0	3.491	290.2	16.22	6.174	947
1524	03/05/2018 11:00:00	733.48	27.51	40.66	0	4.218	292.7	16.87	7.056	947
1525	03/05/2018 12:00:00	796.371	28.77	36.63	0	3.799	301.2	26.01	6.86	946
1526	03/05/2018 13:00:00	789.938	29.78	32.83	0	3.187	295.7	24.57	6.86	945
1527	03/05/2018 14:00:00	716.557	30.76	31.02	0	2.686	300.3	25.65	6.664	944
1528	03/05/2018 15:00:00	548.456	31.09	33.63	0	2.431	328.9	29.25	5.292	944
1529	03/05/2018 16:00:00	321.062	29.97	30.84	0	3.01	322.1	21.75	5.194	943
1530	03/05/2018 17:00:00	139.702	29.4	35.15	0	2.178	331.7	16.38	4.704	943
1531	03/05/2018 18:00:00	9.25716	26.32	42.39	0	1.131	267.2	16.75	2.352	944
1532	03/05/2018 19:00:00	0	22.93	54.5	0	0.813	280.2	59.34	1.666	944
1533	03/05/2018 20:00:00	0	21.45	57.03	0	1.44	263.5	12.3	2.646	945
1534	03/05/2018 21:00:00	0	20.9	55.31	0	2.204	273.3	8.72	3.234	945
1535	03/05/2018 22:00:00	0	19.69	65.02	0	2.486	276	15.25	3.626	945
1536	03/05/2018 23:00:00	0	18.77	65.26	0	1.733	293.5	40.78	3.234	946
1537	04/05/2018 00:00:00	0	19.98	71.45	0	1.821	212.8	39.92	4.802	947
1538	04/05/2018 01:00:00	0	17.36	74.74	0	1.691	277.5	18.03	4.214	948
1539	04/05/2018 02:00:00	0	16.4	78.93	0	0.692	262.6	31.79	1.666	947
1540	04/05/2018 03:00:00	0.576358	16.63	77.45	0	0.593	259.7	16.21	1.47	947
1541	04/05/2018 04:00:00	0.264855	18.92	84.4	0	0.695	129.8	26.8	2.156	947
1542	04/05/2018 05:00:00	0	18.77	86.7	0	0.549	127.7	38.02	2.744	947
1543	04/05/2018 06:00:00	0	19.07	87.5	0	0.937	175.4	34.16	2.646	948
1544	04/05/2018 07:00:00	7.47938	18.78	85.4	0	1.639	178.5	20.03	3.822	948
1545	04/05/2018 08:00:00	71.9939	18.98	81.2	0	1.876	158.8	24.84	4.802	949
1546	04/05/2018 09:00:00	290.798	20.29	72.48	0	2.591	149	17.69	5.782	949
1547	04/05/2018 10:00:00	351.759	22.39	70.11	0	1.765	185	34.24	4.41	950
1548	04/05/2018 11:00:00	311.769	22.3	60.19	0	2.07	205.8	27.14	4.704	949
1549	04/05/2018 12:00:00	610.817	24.31	55.22	0	1.356	302.7	57.16	3.626	949
1550	04/05/2018 13:00:00	784.182	25.88	49.52	0	1.393	33.64	58.68	3.528	948
1551	04/05/2018 14:00:00	695.141	27.23	46.21	0	1.544	54.58	50.32	3.822	947
1552	04/05/2018 15:00:00	551.003	28.36	41.16	0	1.051	191.4	63.52	3.724	946
1553	04/05/2018 16:00:00	358.699	28.36	39.12	0	1.629	70.23	36.19	3.626	946
1554	04/05/2018 17:00:00	145.314	26.71	53.03	0	2.625	41.74	16.28	5.39	946
1555	04/05/2018 18:00:00	9.92784	23.4	68.33	0	1.579	58.63	17.74	3.724	946
1556	04/05/2018 19:00:00	0	21.52	70.78	0	1.644	123.3	18.57	2.94	946
1557	04/05/2018 20:00:00	0	20.88	74.52	0	1.666	135.7	8.82	2.744	947
1558	04/05/2018 21:00:00	0	20.19	74.5	0	1.497	146.3	11.79	2.646	947
1559	04/05/2018 22:00:00	0	19.85	73.67	0	1.37	149.7	13.11	2.45	948
1560	04/05/2018 23:00:00	0	19.57	74.68	0	1.603	144.3	16.19	2.842	948
1561	05/05/2018 00:00:00	0	19.32	77.92	0	1.582	130.7	19.76	3.136	949
1562	05/05/2018 01:00:00	0.0123281	17.87	78.7	0	0.693	137.7	32.11	2.842	949
1563	05/05/2018 02:00:00	0	18.31	83.7	0	1.849	148	16.73	3.724	949
1564	05/05/2018 03:00:00	0	17.9	87.6	0	2.172	136.4	17.86	5.194	949
1565	05/05/2018 04:00:00	0	17.59	91.8	0	1.776	124.1	14.8	3.92	949
1566	05/05/2018 05:00:00	0	17.16	95.3	0	1.729	118	18.95	3.822	949
1567	05/05/2018 06:00:00	0	17.3	94.3	0	0.887	81.1	20.02	1.96	949
1568	05/05/2018 07:00:00	4.34781	17.5	93.7	0	0.762	44.37	18.82	1.666	950
1569	05/05/2018 08:00:00	38.6237	17.83	91.9	0	0.674	27.49	17.89	1.568	951
1570	05/05/2018 09:00:00	108.403	18.79	84.7	0	0.767	65.29	34.22	1.96	951
1571	05/05/2018 10:00:00	152.641	19.73	81.6	0	1.031	29.07	32.9	2.352	951
1572	05/05/2018 11:00:00	212.207	20.8	76.53	0	0.853	59.99	36.45	2.352	951
1573	05/05/2018 12:00:00	604.088	23.12	58.93	0	1.513	79.47	34.23	3.528	950
1574	05/05/2018 13:00:00	651.939	25.25	58.03	0	1.385	42.6	52.57	3.724	949
1575	05/05/2018 14:00:00	400.613	25.1	52.33	0	1.211	57.08	57.56	3.43	948
1576	05/05/2018 15:00:00	568.692	27.23	51.47	0	1.384	28.66	44.16	3.43	947
1577	05/05/2018 16:00:00	360.991	27.3	51.76	0	1.412	54.08	42.91	3.822	947
1578	05/05/2018 17:00:00	148.884	26.18	59.59	0	2.071	50.79	17.85	4.116	947
1579	05/05/2018 18:00:00	10.0051	22.74	73.74	0	1.529	51.62	14.17	3.626	947
1580	05/05/2018 19:00:00	0	20.62	80.8	0	1.015	68.93	13.19	2.254	947
1581	05/05/2018 20:00:00	0	19.98	83.2	0	1.043	112.8	23.25	2.156	948
1582	05/05/2018 21:00:00	0	19.65	82.6	0	1.655	152.3	10.73	2.548	948
1583	05/05/2018 22:00:00	0	18.3	89.5	0	0.828	206.1	45.05	1.568	948
1584	05/05/2018 23:00:00	0	16.81	93.9	0	0.798	298.8	31.1	2.058	948
1585	06/05/2018 00:00:00	0	16.32	95.7	0	1.147	271.1	10.35	2.058	948
1586	06/05/2018 01:00:00	0	16.56	93.5	0	1.22	228.3	14.91	2.352	948
1587	06/05/2018 02:00:00	0	15.44	96.5	0	0.788	326.4	32.21	1.764	948
1588	06/05/2018 03:00:00	0	15.01	97.2	0	1.469	285.9	9.68	2.646	948
1589	06/05/2018 04:00:00	0	15.31	96.6	0	1.785	256.3	14.34	2.744	948
1590	06/05/2018 05:00:00	0	15.05	97.5	0	1.261	255.6	10.31	2.058	948
1591	06/05/2018 06:00:00	0	13.95	98.2	0	0.974	283.4	15.83	1.862	949
1592	06/05/2018 07:00:00	22.945	13.95	97.4	0	1.305	293.1	9.89	2.45	949
1593	06/05/2018 08:00:00	185.484	17.12	83.4	0	2.095	291.5	10.45	3.234	950
1594	06/05/2018 09:00:00	391.52	20.19	70.31	0	2.42	274.8	16.54	3.626	950
1595	06/05/2018 10:00:00	573.046	22.9	61.73	0	1.751	273.7	27.59	3.626	950
1596	06/05/2018 11:00:00	700.349	25.2	54.45	0	1.34	295.2	38	3.528	950
1597	06/05/2018 12:00:00	766.274	27.1	48.62	0	1.888	344.2	31.91	4.508	949
1598	06/05/2018 13:00:00	763.268	28.62	38.71	0	2.277	306.9	36.9	5.684	948
1599	06/05/2018 14:00:00	692.559	30.06	26.92	0	1.727	278.2	42.73	6.37	947
1600	06/05/2018 15:00:00	556.651	30.66	25.94	0	1.635	295.3	50.89	4.802	947
1601	06/05/2018 16:00:00	367.375	30.86	25.88	0	1.272	329.5	49.69	3.43	947
1602	06/05/2018 17:00:00	148.706	30.08	29.45	0	1.024	25.15	32.31	1.96	947
1603	06/05/2018 18:00:00	7.83881	24.86	40.08	0	0.677	79.62	25.91	1.96	947
1604	06/05/2018 19:00:00	0	22.03	52.3	0	1.084	130.8	25.54	2.45	948
1605	06/05/2018 20:00:00	0	20.12	63.8	0	1.041	157.9	8.59	1.666	948
1606	06/05/2018 21:00:00	0	19.38	67.27	0	1.139	151.1	6.602	1.862	949
1607	06/05/2018 22:00:00	0	18.28	73.08	0	0.622	246.5	33.88	1.078	949
1608	06/05/2018 23:00:00	0	17.21	74.61	0	1.054	272.6	21.17	1.96	949
1609	07/05/2018 00:00:00	0	16.93	73.47	0	0.98	237.3	11.79	1.666	949
1610	07/05/2018 01:00:00	0	15.78	80.8	0	0.764	330.2	42.52	1.568	949
1611	07/05/2018 02:00:00	0	15.5	74.54	0	1.768	273.9	12.5	2.842	949
1612	07/05/2018 03:00:00	0	15.26	77.84	0	1.301	280.1	8.41	1.862	949
1613	07/05/2018 04:00:00	0	14.63	79.04	0	1.175	275.4	14.15	1.862	949
1614	07/05/2018 05:00:00	0	14.18	80.4	0	0.872	247.5	27.68	1.666	949
1615	07/05/2018 06:00:00	0	13.72	84.4	0	0.922	281.1	18.94	1.666	950
1616	07/05/2018 07:00:00	21.9556	13.69	78.02	0	0.805	289.7	14.28	1.764	950
1617	07/05/2018 08:00:00	183.235	18.37	63.1	0	1.226	298	18.26	2.156	951
1618	07/05/2018 09:00:00	392.2	21.73	56.05	0	1.165	326.1	29.54	2.548	951
1619	07/05/2018 10:00:00	577.241	24.1	53.74	0	1.123	294.1	58.2	2.646	951
1620	07/05/2018 11:00:00	704.165	25.48	50.14	0	1.273	303.3	45.5	2.94	951
1621	07/05/2018 12:00:00	782.275	27.43	41.46	0	1.71	102.9	36.12	4.214	950
1622	07/05/2018 13:00:00	781.41	28.16	32.82	0	2.377	110.8	30.17	5.292	949
1623	07/05/2018 14:00:00	684.69	29	33.05	0	2.014	167.7	46.41	5.488	948
1624	07/05/2018 15:00:00	512.71	28.83	31.68	0	1.916	163.8	39.03	4.606	948
1625	07/05/2018 16:00:00	360.154	28.84	29.02	0	2.273	147	35.18	4.9	948
1626	07/05/2018 17:00:00	155.475	27.81	32.41	0	2.122	145.1	17.57	4.802	948
1627	07/05/2018 18:00:00	9.77576	24.45	44.31	0	1.234	149.3	19.67	3.136	948
1628	07/05/2018 19:00:00	0	21.77	48.8	0	1.279	159.3	11.84	1.862	948
1629	07/05/2018 20:00:00	0	20.65	49.53	0	1.528	173.7	10.09	2.254	949
1630	07/05/2018 21:00:00	0	21	47.54	0	1.597	157	12.04	2.94	949
1631	07/05/2018 22:00:00	0	19.41	59.07	0	1.378	115.8	31.23	2.744	949
1632	07/05/2018 23:00:00	0	17.42	59.1	0	1.451	119.5	23.74	2.548	950
1633	08/05/2018 00:00:00	0	17.77	65.35	0	1.762	151	9.26	2.254	950
1634	08/05/2018 01:00:00	0	16.9	66.09	0	1.637	196.4	9.88	2.254	950
1635	08/05/2018 02:00:00	0	16.13	72.55	0	1.669	190.6	7.237	2.254	950
1636	08/05/2018 03:00:00	0	14.03	81.3	0	0.732	178.7	33.84	1.862	950
1637	08/05/2018 04:00:00	0	12.24	85.9	0	0.584	286.5	30.8	2.254	950
1638	08/05/2018 05:00:00	0.00268243	12.33	82.8	0	1.199	262.3	20.51	2.646	950
1639	08/05/2018 06:00:00	1.01335	14.31	77.05	0	0.491	228.2	50.74	1.568	950
1640	08/05/2018 07:00:00	7.21211	14.62	76.78	0	0.778	308.1	24.26	1.862	950
1641	08/05/2018 08:00:00	48.081	15.1	71.32	0	1.214	307	16.1	2.548	951
1642	08/05/2018 09:00:00	150.968	16.85	68.5	0	1.479	300	13.77	2.45	951
1643	08/05/2018 10:00:00	381.553	19.48	69.36	0	1.536	317.6	30.69	3.038	951
1644	08/05/2018 11:00:00	571.097	21.38	60.08	0	1.288	312.2	56.33	3.724	951
1645	08/05/2018 12:00:00	770.223	23.53	48.13	0	1.122	283.4	76.58	2.94	950
1646	08/05/2018 13:00:00	767.861	25.05	43.68	0	1.413	81.5	61.98	4.214	948
1647	08/05/2018 14:00:00	695.658	26.37	37.94	0	1.424	44.78	63.68	4.214	947
1648	08/05/2018 15:00:00	555.7	27.65	33.87	0	1.064	90.2	65.57	4.312	946
1649	08/05/2018 16:00:00	366.815	27.24	33.9	0	1.915	123.6	28.97	4.802	946
1650	08/05/2018 17:00:00	152.086	26.32	44.45	0	1.54	62.07	50.93	3.626	946
1651	08/05/2018 18:00:00	8.67496	21.74	59.9	0	0.751	14.63	33.34	2.548	946
1652	08/05/2018 19:00:00	0	18.86	67.5	0	0.259	147.7	57.96	0.784	946
1653	08/05/2018 20:00:00	0	17.26	72.22	0	0.529	187.6	17.45	1.47	947
1654	08/05/2018 21:00:00	0	16.12	78.59	0	0.68	262.4	12.73	1.47	947
1655	08/05/2018 22:00:00	0	14.98	77.84	0	0.9	251.2	11.66	2.058	947
1656	08/05/2018 23:00:00	0	14.86	78.08	0	1.747	276.4	13.8	3.136	947
1657	09/05/2018 00:00:00	0	13.9	82.4	0	1.257	283.2	13.38	2.744	947
1658	09/05/2018 01:00:00	0	13.55	81.7	0	1.224	272.3	21.34	2.842	947
1659	09/05/2018 02:00:00	0	13.7	82.5	0	1.474	280.8	21.77	2.744	947
1660	09/05/2018 03:00:00	0	13.17	79.8	0	1.97	274.3	19.49	4.312	946
1661	09/05/2018 04:00:00	0	13.43	84.4	0	1.579	286.4	25.91	3.92	946
1662	09/05/2018 05:00:00	0	12.67	80.7	0	2.635	280.4	12.05	4.116	946
1663	09/05/2018 06:00:00	0	12.81	78.53	0	2.596	273.9	6.921	3.92	946
1664	09/05/2018 07:00:00	21.1548	12.36	76.27	0	2.576	285.2	10.64	4.508	947
1665	09/05/2018 08:00:00	190.788	15.61	60.26	0	3	286.6	10.73	5.096	947
1666	09/05/2018 09:00:00	403.622	19.67	50.38	0	2.612	283.1	15.24	4.508	947
1667	09/05/2018 10:00:00	583.435	23.06	42.19	0	2.924	272	17.98	5.684	947
1668	09/05/2018 11:00:00	700.815	26.11	35.72	0	2.366	296	23.55	6.272	947
1669	09/05/2018 12:00:00	755.847	28.04	33.43	0	3.309	308.7	21.6	6.272	946
1670	09/05/2018 13:00:00	748.9	29.65	25.11	0	2.647	292	29.66	6.566	945
1671	09/05/2018 14:00:00	672.254	30.9	19.4	0	1.728	250	61.13	6.37	944
1672	09/05/2018 15:00:00	531.721	31.34	18.64	0	1.86	259.7	40.38	4.116	944
1673	09/05/2018 16:00:00	345.141	30.56	23.87	0	2.542	329.8	32.19	5.684	944
1674	09/05/2018 17:00:00	138.405	28.78	28.26	0	2.228	328	17.25	4.606	944
1675	09/05/2018 18:00:00	7.43257	24.6	41.92	0	0.987	28.8	57.59	2.45	944
1676	09/05/2018 19:00:00	0	20.72	48.89	0	0.603	148	22.33	1.764	944
1677	09/05/2018 20:00:00	0	18.84	53.06	0	0.905	231	46.99	1.568	945
1678	09/05/2018 21:00:00	0	18.16	52.01	0	1.749	278.2	10.62	3.332	946
1679	09/05/2018 22:00:00	0	17.49	58.09	0	2.082	282.6	11.3	3.038	946
1680	09/05/2018 23:00:00	0	16.17	57.24	0	1.322	274.3	18.16	2.548	946
1681	10/05/2018 00:00:00	0	15.49	61.69	0	1.385	262.5	53.13	4.116	946
1682	10/05/2018 01:00:00	0	15.13	56.82	0	1.733	266.1	21.6	3.92	946
1683	10/05/2018 02:00:00	0	15.83	61.09	0	1.545	252.4	34.7	3.528	946
1684	10/05/2018 03:00:00	0	14.69	51.96	0	1.89	265.4	17.06	3.528	945
1685	10/05/2018 04:00:00	0	14.57	61.2	0	2.45	292.6	12.76	3.43	945
1686	10/05/2018 05:00:00	0	14.23	61.89	0	2.592	289.8	9.38	3.724	946
1687	10/05/2018 06:00:00	0	13.92	62.27	0	2.596	288.8	10.48	3.92	946
1688	10/05/2018 07:00:00	18.3868	13.71	61.34	0	2.38	293.1	19.49	4.214	947
1689	10/05/2018 08:00:00	180.598	16.91	46.02	0	1.94	293.1	22.49	3.528	948
1690	10/05/2018 09:00:00	390.084	22.66	34.18	0	2.202	264.4	32.04	4.018	949
1691	10/05/2018 10:00:00	568.314	24.33	35.14	0	2.659	265.2	21.97	4.802	949
1692	10/05/2018 11:00:00	688.458	26.34	28.25	0	2.096	270.9	22.69	4.116	949
1693	10/05/2018 12:00:00	747.263	28.51	26.91	0	1.196	186.7	62.6	3.43	948
1694	10/05/2018 13:00:00	743.227	29.97	24.54	0	1.291	193.2	43.68	4.018	947
1695	10/05/2018 14:00:00	651.624	30.68	23.02	0	1.344	113.5	60.02	3.92	947
1696	10/05/2018 15:00:00	510.702	30.87	21.62	0	1.643	117.4	35.17	4.312	946
1697	10/05/2018 16:00:00	332.74	30.13	24.42	0	2.221	135.3	26.67	4.9	946
1698	10/05/2018 17:00:00	129.336	28.65	26.88	0	2.075	136.7	14.85	4.312	946
1699	10/05/2018 18:00:00	6.98851	24.72	40	0	1.261	138	37.6	3.136	947
1700	10/05/2018 19:00:00	0	20.5	44.17	0	0.791	204.9	16.41	1.764	947
1701	10/05/2018 20:00:00	0	19.3	50.85	0	1.072	273.9	25.91	1.666	948
1702	10/05/2018 21:00:00	0	17.86	59.62	0	0.868	284.3	20.24	1.862	949
1703	10/05/2018 22:00:00	0	16.73	54.54	0	0.933	156.1	46.6	1.862	949
1704	10/05/2018 23:00:00	0	18.65	51.93	0	1.671	136.6	13.15	2.548	949
1705	11/05/2018 00:00:00	0	16.15	58.31	0	0.857	161.7	39.93	1.764	949
1706	11/05/2018 01:00:00	0	15.58	62.83	0	1.21	183.1	11.76	2.352	948
1707	11/05/2018 02:00:00	0	13.88	76.7	0	1.119	289	14.08	2.156	948
1708	11/05/2018 03:00:00	0	13.58	64.58	0	1.742	266.2	22.08	2.352	948
1709	11/05/2018 04:00:00	0	14.27	77.93	0	1.042	251.8	51.51	2.352	948
1710	11/05/2018 05:00:00	0	11.62	78.98	0	1.36	292.8	13.11	2.548	948
1711	11/05/2018 06:00:00	0	13.01	70.61	0	2.286	271	7.874	3.332	948
1712	11/05/2018 07:00:00	17.4027	13.02	70.25	0	1.524	283.2	9.88	2.254	948
1713	11/05/2018 08:00:00	187.052	17.87	53.02	0	1.245	299.9	12.19	3.038	949
1714	11/05/2018 09:00:00	373.466	20.71	45.72	0	1.917	288.8	16.62	3.136	949
1715	11/05/2018 10:00:00	542.236	22.59	40.93	0	2.264	283.1	18.49	3.822	950
1716	11/05/2018 11:00:00	710.398	25.32	35.86	0	2.018	266.3	24.83	4.018	949
1717	11/05/2018 12:00:00	762.919	27.3	31.73	0	1.22	318.6	50.94	3.822	948
1718	11/05/2018 13:00:00	753.139	28.46	27.82	0	1.5	136.6	57.68	4.606	947
1719	11/05/2018 14:00:00	686.774	29.51	24.77	0	1.854	80.3	47.34	6.468	946
1720	11/05/2018 15:00:00	540.598	29.55	26.49	0	1.849	39.39	42.6	4.606	945
1721	11/05/2018 16:00:00	355.182	29.37	28.49	0	2.197	68.08	26.91	4.704	945
1722	11/05/2018 17:00:00	147.07	28.02	32.4	0	1.82	55.53	17.7	4.214	945
1723	11/05/2018 18:00:00	7.18207	23.08	47.23	0	0.948	75.56	16.01	2.45	945
1724	11/05/2018 19:00:00	0	19.3	53.76	0	0.272	102.6	39.14	1.078	946
1725	11/05/2018 20:00:00	0	18.1	59.63	0	0.357	200.9	8.59	0.882	946
1726	11/05/2018 21:00:00	0	17.03	63.76	0	0.372	134	54.77	1.078	946
1727	11/05/2018 22:00:00	0	16.31	66.68	0	0.362	193.3	20.42	0.98	947
1728	11/05/2018 23:00:00	0	15.52	66.52	0	1.152	265.4	17.74	2.352	946
1729	12/05/2018 00:00:00	0	15.55	65.49	0	1.109	243.4	15.22	1.666	946
1730	12/05/2018 01:00:00	0	14.17	70.56	0	0.976	295.9	57.8	2.548	946
1731	12/05/2018 02:00:00	0	13.69	75.44	0	0.981	289.2	16.53	2.058	945
1732	12/05/2018 03:00:00	0	12.66	73.98	0	1.215	287.2	13.62	2.254	945
1733	12/05/2018 04:00:00	0	12.34	76.88	0	1.105	284.8	13.57	2.254	944
1734	12/05/2018 05:00:00	0	11.91	75.82	0	1.424	282.4	13.84	2.646	944
1735	12/05/2018 06:00:00	0	12.18	76.29	0	2.289	293.3	9.48	3.626	945
1736	12/05/2018 07:00:00	21.4605	12.06	72	0	2.554	291.8	8.01	3.92	945
1737	12/05/2018 08:00:00	176.321	15.53	58.37	0	2.487	293.5	10.05	3.724	946
1738	12/05/2018 09:00:00	409.239	21.28	46.39	0	1.824	287.5	22.98	4.704	946
1739	12/05/2018 10:00:00	585.446	24.31	42.63	0	2.729	290.1	19.15	5.096	946
1740	12/05/2018 11:00:00	705.791	26.67	31.14	0	2.377	310.9	20.81	4.508	945
1741	12/05/2018 12:00:00	758.721	28.79	27.12	0	1.986	302.3	37.6	5.096	944
1742	12/05/2018 13:00:00	752.636	29.99	16.87	0	2.748	250.6	41.78	5.88	943
1743	12/05/2018 14:00:00	683.658	31.2	13.71	0	1.653	291.5	64.05	4.312	942
1744	12/05/2018 15:00:00	533.553	31.42	18.05	0	1.374	291.8	57.3	4.802	941
1745	12/05/2018 16:00:00	342.223	31.25	18.9	0	1.294	45.98	65.19	4.018	941
1746	12/05/2018 17:00:00	131.372	29.58	26.56	0	1.543	7.056	32.34	3.43	941
1747	12/05/2018 18:00:00	6.00066	24.81	35.27	0	1	106.5	36.04	2.646	942
1748	12/05/2018 19:00:00	0	21.94	38.67	0	1.26	132.5	26.58	3.136	942
1749	12/05/2018 20:00:00	0	19.18	44.49	0	0.681	155	33.58	1.568	943
1750	12/05/2018 21:00:00	0	18.08	47.27	0	0.78	147.6	29.72	2.254	943
1751	12/05/2018 22:00:00	0	18.58	48.07	0	1.396	147.3	9.4	2.646	943
1752	12/05/2018 23:00:00	0	16.94	56.13	0	0.831	153.6	41.74	1.666	943
1753	13/05/2018 00:00:00	0	15.35	58.92	0	0.761	223.7	41.58	1.47	943
1754	13/05/2018 01:00:00	0.0536311	16.76	51.84	0	0.98	170.1	30.66	1.666	942
1755	13/05/2018 02:00:00	0	15.63	61.49	0	0.764	259.8	28.56	1.862	942
1756	13/05/2018 03:00:00	0	17.06	44.04	0	2.329	206.2	38.69	5.88	942
1757	13/05/2018 04:00:00	0	18.17	70.83	0	3.193	161.4	19.92	7.84	943
1758	13/05/2018 05:00:00	0	15.64	67.11	0	1.609	294.6	38.78	4.41	944
1759	13/05/2018 06:00:00	0	15.64	71.67	0	0.808	312.3	30.17	2.254	944
1760	13/05/2018 07:00:00	4.94324	15.65	71.44	0	1.158	270.4	13.34	2.45	945
1761	13/05/2018 08:00:00	35.5407	17.1	81.7	0	0.769	218.9	55.24	2.352	945
1762	13/05/2018 09:00:00	242.596	19.18	71.19	0	1.647	163.6	28.04	3.332	946
1763	13/05/2018 10:00:00	646.624	22.98	59.15	0	1.23	93.4	37.66	2.94	945
1764	13/05/2018 11:00:00	689.094	23.52	59.18	0	1.868	139.6	45.64	9.21	945
1765	13/05/2018 12:00:00	731.84	24.55	54.73	0	2.307	126.5	27.58	4.802	943
1766	13/05/2018 13:00:00	726.291	26.3	46.25	0	2.389	120.3	28.89	5.684	943
1767	13/05/2018 14:00:00	648.814	28.05	43.43	0	2.249	99.8	31.01	5.292	942
1768	13/05/2018 15:00:00	508.479	28.9	44.61	0	2.014	103.6	30.56	6.174	941
1769	13/05/2018 16:00:00	323.213	27.85	46.63	0	2.854	128.3	19.14	5.488	941
1770	13/05/2018 17:00:00	124.335	26.73	49.88	0	2.627	123.1	17.43	5.39	941
1771	13/05/2018 18:00:00	5.89964	24.09	62.3	0	1.013	96.9	33.47	2.646	942
1772	13/05/2018 19:00:00	0	21.58	65.76	0	1.079	190.8	48.85	2.254	942
1773	13/05/2018 20:00:00	0	20.27	65.1	0	0.955	228.2	39.21	2.254	943
1774	13/05/2018 21:00:00	0	19.9	73.61	0	0.906	266.4	41.07	1.96	944
1775	13/05/2018 22:00:00	0	18.59	74.74	0	1.09	267.7	20.39	2.254	945
1776	13/05/2018 23:00:00	0	18.06	77.46	0	1.129	247.3	16.83	1.96	945
1777	14/05/2018 00:00:00	0	18.13	77.44	0	1.044	217	42.55	2.352	945
1778	14/05/2018 01:00:00	0	17.76	81.9	0	0.993	214	52.29	2.45	945
1779	14/05/2018 02:00:00	0	18.36	86.3	0	1.432	166.9	32.24	3.43	945
1780	14/05/2018 03:00:00	0	18.59	88.3	0	1.775	133.2	17.86	3.822	945
1781	14/05/2018 04:00:00	0	18.46	89.6	0	1.75	136.6	14.75	3.43	945
1782	14/05/2018 05:00:00	0	18.36	91.1	0	1.87	147.1	13.73	3.626	945
1783	14/05/2018 06:00:00	0	18.25	91.7	0	1.738	144.2	17.82	3.626	945
1784	14/05/2018 07:00:00	5.95456	18.25	91.8	0	1.222	127.6	21.11	3.234	946
1785	14/05/2018 08:00:00	51.8197	18.83	88.1	0	1.32	122.7	19.13	3.724	946
1786	14/05/2018 09:00:00	160.631	19.96	84.6	0	2.556	138.3	17.05	4.704	947
1787	14/05/2018 10:00:00	272.524	21.07	75.75	0	2.712	142.1	16.94	5.586	947
1788	14/05/2018 11:00:00	508.069	22.92	70.32	0	3.588	145.3	18.31	6.958	946
1789	14/05/2018 12:00:00	405.085	23.18	66.29	0	3.231	151.5	20.01	6.272	946
1790	14/05/2018 13:00:00	313.634	23.1	71.81	0	4.092	175	18.57	7.644	946
1791	14/05/2018 14:00:00	156.228	22.18	72.64	0	3.739	196.5	16.32	6.762	945
1792	14/05/2018 15:00:00	74.4471	21.05	88.1	0.254	2.509	199.4	17.67	5.684	945
1793	14/05/2018 16:00:00	44.5949	19.61	89.1	0	1.999	190.9	16.77	4.704	945
1794	14/05/2018 17:00:00	11.5937	19.21	91.9	0	1.888	217.5	18.73	4.214	946
1795	14/05/2018 18:00:00	0.639404	18.59	93.9	0	3.629	208.8	14.69	8.33	947
1796	14/05/2018 19:00:00	0.478624	16.66	92.2	0	4.665	207.6	16.05	8.72	947
1797	14/05/2018 20:00:00	0.100789	15.7	94.8	0.254	2.705	216.7	22.47	6.958	948
1798	14/05/2018 21:00:00	0.596191	15.7	96.9	0.254	1.582	341.5	77.11	4.704	949
1799	14/05/2018 22:00:00	0.790811	15.65	97.1	0	1.247	51.47	60.3	3.822	949
1800	14/05/2018 23:00:00	0.672324	15.52	96.7	0	1.528	117.3	31.05	4.116	948
1801	15/05/2018 00:00:00	0.569384	15.06	96.5	0	2.405	113.3	24.85	5.39	948
1802	15/05/2018 01:00:00	0.319545	14.66	95.7	0	2.575	173.4	24.24	5.39	948
1803	15/05/2018 02:00:00	0.193035	14.49	96.9	0	1.93	145.9	29.82	4.704	949
1804	15/05/2018 03:00:00	0.0648842	14.43	96.6	0	1.019	207.1	44.54	2.744	948
1805	15/05/2018 04:00:00	0.0622025	14.56	97.4	0	1.12	150.8	50.5	2.646	948
1806	15/05/2018 05:00:00	0.178565	14.49	96.9	0	2.072	200.2	21.75	4.018	948
1807	15/05/2018 06:00:00	0.122261	14.54	95.8	0	1.402	203.7	21.7	3.234	948
1808	15/05/2018 07:00:00	2.07039	14.64	97.4	0	1.009	250.8	25.22	2.352	949
1809	15/05/2018 08:00:00	35.4452	14.76	95.5	0	1.772	229.2	15.44	3.43	950
1810	15/05/2018 09:00:00	140.385	15.65	90.3	0	1.537	220.8	17.93	2.94	950
1811	15/05/2018 10:00:00	150.651	16.37	88.1	0	1.748	203.1	21.6	3.038	951
1812	15/05/2018 11:00:00	155.561	16.92	84.5	0	2.099	160	20.94	4.998	950
1813	15/05/2018 12:00:00	107.205	17.06	83.7	0	1.99	157.6	15.74	4.704	950
1814	15/05/2018 13:00:00	96.2227	17.33	81.9	0	1.413	141.6	21	3.136	949
1815	15/05/2018 14:00:00	69.216	17.72	83.1	0	0.531	193.2	53.79	2.058	949
1816	15/05/2018 15:00:00	70.0553	17.19	87.3	0	1.378	353.7	32.92	2.744	949
1817	15/05/2018 16:00:00	70.9665	17.3	86.8	0	0.957	345.3	21.62	2.254	949
1818	15/05/2018 17:00:00	69.3966	17.38	86.7	0	1.009	12.53	12.95	2.058	948
1819	15/05/2018 18:00:00	7.09456	16.03	95	0	0.806	32.72	12.3	1.47	949
1820	15/05/2018 19:00:00	0	14.67	97.3	0	0.372	223.1	20.87	1.568	949
1821	15/05/2018 20:00:00	0	14.08	97.5	0	0.795	211.4	12.21	1.568	949
1822	15/05/2018 21:00:00	0	13.46	98.4	0	0.869	273.7	19.1	2.548	950
1823	15/05/2018 22:00:00	0	13.4	98.2	0	1.582	266	24.94	2.646	950
1824	15/05/2018 23:00:00	0	12.92	98.3	0	1.907	274.6	17.04	3.43	950
1825	16/05/2018 00:00:00	0	13.03	98.1	0	1.724	273.4	15.15	3.136	949
1826	16/05/2018 01:00:00	0	12.69	98.8	0	1.787	271.7	14.57	2.94	949
1827	16/05/2018 02:00:00	0	12.63	98.7	0	1.555	286.4	16.68	3.234	949
1828	16/05/2018 03:00:00	0	11.79	98.9	0	1.642	286	9.9	2.548	949
1829	16/05/2018 04:00:00	0	12.52	98.3	0	1.352	298.8	16.39	2.842	949
1830	16/05/2018 05:00:00	0	11.8	98.9	0	1.539	282.8	14.13	2.744	949
1831	16/05/2018 06:00:00	0	11.52	98.5	0	1.797	282.1	10.98	3.136	949
1832	16/05/2018 07:00:00	12.6136	11.1	97.4	0	1.509	290.3	20.82	3.038	950
1833	16/05/2018 08:00:00	167.808	13.2	87.8	0	1.864	293.6	13.86	3.528	950
1834	16/05/2018 09:00:00	376.601	16.7	79.23	0	1.959	292.9	14.6	3.234	951
1835	16/05/2018 10:00:00	554.736	19.48	68.9	0	1.41	327.8	51.73	3.136	951
1836	16/05/2018 11:00:00	712.454	21.56	56.06	0	1.194	21.61	42.11	3.332	950
1837	16/05/2018 12:00:00	720.586	22.49	52.55	0	1.332	297.7	67.29	3.724	949
1838	16/05/2018 13:00:00	693.479	23.23	50.92	0	1.737	330.4	46.46	3.528	948
1839	16/05/2018 14:00:00	694.547	24.76	47.8	0	1.276	0.999	71.36	4.508	947
1840	16/05/2018 15:00:00	575.341	24.9	45.51	0	1.943	22.88	33.19	4.704	947
1841	16/05/2018 16:00:00	364.945	25.15	48.75	0	1.524	43.69	32.68	3.724	946
1842	16/05/2018 17:00:00	132.753	23.6	56.68	0	1.501	48.42	26.49	3.136	946
1843	16/05/2018 18:00:00	5.69552	20.2	69.34	0	1.938	165.7	48.28	5.292	947
1844	16/05/2018 19:00:00	0	17.7	75.79	0	1.863	144.4	16.77	3.626	947
1845	16/05/2018 20:00:00	0	16.59	73.29	0	2.281	142.5	13.59	4.018	947
1846	16/05/2018 21:00:00	0	15.81	82.2	0	0.754	351.7	49.72	1.96	948
1847	16/05/2018 22:00:00	0	16.43	80.7	0	0.966	196.1	9.95	1.372	948
1848	16/05/2018 23:00:00	0	16.31	84.1	0	1.132	245.3	49.22	2.254	948
1849	17/05/2018 00:00:00	0	16.48	75.95	0	1.676	218.4	23.61	3.626	948
1850	17/05/2018 01:00:00	0	16.6	88.2	0	0.986	315.5	75.03	2.254	948
1851	17/05/2018 02:00:00	0	15.4	89.8	0	1.347	294.2	17.19	2.842	948
1852	17/05/2018 03:00:00	0	15.54	88.1	0	1.251	252.5	17.1	2.45	948
1853	17/05/2018 04:00:00	0	15.42	90.1	0	0.855	259.8	17.04	1.568	948
1854	17/05/2018 05:00:00	0	14.39	94.2	0	0.574	249.4	18.77	1.372	948
1855	17/05/2018 06:00:00	0	13.12	96.4	0	0.566	286.3	23.61	1.568	949
1856	17/05/2018 07:00:00	11.2416	12.74	95.4	0	0.541	255.3	16.2	1.372	949
1857	17/05/2018 08:00:00	154.562	15.99	80.8	0	0.898	297.4	19.27	2.254	950
1858	17/05/2018 09:00:00	353.709	18.74	66.28	0	0.851	328.5	44.65	1.862	950
1859	17/05/2018 10:00:00	529.968	20.42	65.5	0	1.653	266.2	37.07	3.92	951
1860	17/05/2018 11:00:00	659.437	21.66	55.88	0	2.103	264.1	30.43	4.41	950
1861	17/05/2018 12:00:00	725.226	22.85	53.62	0	1.933	268.4	38.64	4.41	949
1862	17/05/2018 13:00:00	720.227	24.1	48.76	0	1.367	275.8	63.08	3.822	948
1863	17/05/2018 14:00:00	646.053	25.36	47.59	0	1.235	273.4	47.97	3.724	948
1864	17/05/2018 15:00:00	497.435	25.45	42.77	0	1.542	295.6	45.65	3.136	947
1865	17/05/2018 16:00:00	336.952	25.58	44.75	0	1.148	340.4	40.43	3.528	947
1866	17/05/2018 17:00:00	125.49	23.87	59.71	0	1.757	13.28	14.7	3.332	947
1867	17/05/2018 18:00:00	5.27865	20.64	77.08	0	0.625	53.81	14.25	1.47	947
1868	17/05/2018 19:00:00	0	18.29	83.5	0	0.528	147.6	39.03	0.98	947
1869	17/05/2018 20:00:00	0	17.36	85.9	0	1.111	174.9	11.74	1.862	948
1870	17/05/2018 21:00:00	0	16.27	90.9	0	0.302	208.6	44.82	1.568	948
1871	17/05/2018 22:00:00	0	15.42	91	0	0.828	272	16.94	1.764	949
1872	17/05/2018 23:00:00	0	15.09	92.2	0	0.971	258.6	18.39	1.666	949
1873	18/05/2018 00:00:00	0	14.96	93.7	0	0.814	219.8	49.73	2.058	949
1874	18/05/2018 01:00:00	0	14.41	92.3	0	0.862	225.2	29.37	2.352	949
1875	18/05/2018 02:00:00	0	13.46	96.2	0	1.252	292.1	21.86	2.058	949
1876	18/05/2018 03:00:00	0	13.17	96	0	0.852	260.3	11.87	1.47	949
1877	18/05/2018 04:00:00	0	12.88	96.9	0	0.932	301.1	16.08	1.764	949
1878	18/05/2018 05:00:00	0	12.44	97.3	0	1.109	287.6	22.26	2.352	949
1879	18/05/2018 06:00:00	0	12.07	97.9	0	0.931	291.2	25.21	1.96	950
1880	18/05/2018 07:00:00	11.5542	11.97	96.5	0	1.307	282.2	12.01	2.352	950
1881	18/05/2018 08:00:00	99.5961	14.14	88.8	0	1.599	276.1	13.87	2.646	951
1882	18/05/2018 09:00:00	307.992	17.37	72.54	0	1.354	298.1	15.68	2.352	951
1883	18/05/2018 10:00:00	563.934	20.12	68.73	0	1.774	341.7	26.38	3.43	952
1884	18/05/2018 11:00:00	472.384	21.33	66.61	0	1.076	249.6	46.13	3.136	952
1885	18/05/2018 12:00:00	509.553	22.41	55.2	0	0.958	156.6	62.5	3.822	951
1886	18/05/2018 13:00:00	581.88	23.54	51.11	0	2.378	143.3	28.45	5.096	950
1887	18/05/2018 14:00:00	389.132	23.25	54	0	2.587	161.6	28.47	5.586	949
1888	18/05/2018 15:00:00	357.232	23.45	53.04	0	3.22	168.6	31.8	6.076	949
1889	18/05/2018 16:00:00	203.281	22.77	50.1	0	2.626	160.6	20.25	5.782	949
1890	18/05/2018 17:00:00	77.8232	21.93	57.77	0	2.155	166.9	18.47	4.214	949
1891	18/05/2018 18:00:00	7.28962	20.74	63.72	0	1.756	171.3	16.01	4.018	949
1892	18/05/2018 19:00:00	0	20.14	66.14	0	2.194	182.7	12.6	4.116	950
1893	18/05/2018 20:00:00	0	19.81	66.43	0	1.886	183.7	14.06	3.92	950
1894	18/05/2018 21:00:00	0	19.32	68.33	0	1.791	176.4	15.87	3.822	951
1895	18/05/2018 22:00:00	0	19.43	70.49	0	2.906	156.4	16.58	5.978	951
1896	18/05/2018 23:00:00	0	18.62	76.65	0	3.059	149.3	15.59	5.978	951
1897	19/05/2018 00:00:00	0	17.43	81.2	0	1.713	141.2	20.34	5.292	952
1898	19/05/2018 01:00:00	0	17.34	83.7	0	1.839	155	19.9	4.606	952
1899	19/05/2018 02:00:00	0	17.35	86.9	0	2.147	171.9	17.78	4.606	952
1900	19/05/2018 03:00:00	0	16.99	87.8	0	2.647	180.4	17.95	5.586	952
1901	19/05/2018 04:00:00	0	16.99	87.9	0	2.586	186.6	17.12	5.488	951
1902	19/05/2018 05:00:00	0	16.86	89	0	1.726	182	19.06	4.018	951
1903	19/05/2018 06:00:00	0	16.71	92.2	0	2.447	182.3	15.67	5.194	951
1904	19/05/2018 07:00:00	5.14511	16.66	91.5	0	3.065	160.5	16.55	7.056	952
1905	19/05/2018 08:00:00	48.7579	16.94	90.7	0	2.561	149.7	13.72	5.488	952
1906	19/05/2018 09:00:00	56.3784	16.86	94	0	2.833	159.2	17.25	5.782	953
1907	19/05/2018 10:00:00	270.9	18.04	87.1	0	3.174	153.9	17.74	5.684	953
1908	19/05/2018 11:00:00	302.707	19.31	88.4	0	3.243	138.9	17.04	6.762	953
1909	19/05/2018 12:00:00	368.824	18.78	88.4	0	3.114	152	18.28	6.86	952
1910	19/05/2018 13:00:00	365.309	20.04	82.5	0	2.572	147.8	21.96	5.488	951
1911	19/05/2018 14:00:00	292.858	20.82	73.56	0	2.804	149.5	19.75	5.782	950
1912	19/05/2018 15:00:00	192.095	21.03	71.67	0	2.968	148.1	18.44	5.782	950
1913	19/05/2018 16:00:00	119.269	19.59	93.9	0.254	2.437	140.1	19.25	6.174	950
1914	19/05/2018 17:00:00	59.2811	19	92.5	0	1.233	124.1	21.33	2.842	950
1915	19/05/2018 18:00:00	2.53403	18.52	95.4	0.254	0.534	148.3	60.84	3.038	950
1916	19/05/2018 19:00:00	0.214921	18.21	92.9	0	1.75	168.5	21.34	4.802	950
1917	19/05/2018 20:00:00	0.402509	17.77	92.3	0	2.959	169.8	19.65	5.978	951
1918	19/05/2018 21:00:00	0.0251912	17.44	94.2	0	2.145	167.8	17.81	4.998	951
1919	19/05/2018 22:00:00	0.0444875	17.26	92.4	0	2.535	180.7	16.87	4.9	951
1920	19/05/2018 23:00:00	0	17.27	92.1	0	2.353	181.3	17.18	5.684	951
1921	20/05/2018 00:00:00	0	17.44	90.5	0	2.987	174.1	17.81	6.566	951
1922	20/05/2018 01:00:00	0	17.36	91.6	0	3.285	174.8	17.97	8.23	951
1923	20/05/2018 02:00:00	0	17.16	94.8	0	2.869	158.9	17.66	7.252	951
1924	20/05/2018 03:00:00	0.00589667	16.61	97.3	0.254	1.846	150.8	21.02	5.488	951
1925	20/05/2018 04:00:00	0.0804194	16.25	96.1	0	2.623	151.8	14.87	5.096	950
1926	20/05/2018 05:00:00	0.0166204	16.31	96.8	0	1.536	137.7	18.48	3.332	950
1927	20/05/2018 06:00:00	0	16.3	97	0	1.64	137.6	16.11	3.038	950
1928	20/05/2018 07:00:00	13.4604	16.21	96.5	0	0.998	129.2	21.07	2.744	951
1929	20/05/2018 08:00:00	116.273	16.93	92.4	0	1.422	130.2	15.55	2.842	951
1930	20/05/2018 09:00:00	329.297	18.45	81.3	0	2.43	130.3	17.04	5.488	951
1931	20/05/2018 10:00:00	466.379	19.91	69.54	0	2.666	126.2	22.62	5.684	952
1932	20/05/2018 11:00:00	430.368	20.61	68.63	0	2.991	133.3	24.56	5.292	951
1933	20/05/2018 12:00:00	624.891	21.98	62.99	0	2.583	158.2	22.2	5.782	951
1934	20/05/2018 13:00:00	581.069	22.62	56.86	0	2.937	144.9	23.93	8.92	950
1935	20/05/2018 14:00:00	249.558	22.39	60.98	0	2.771	133.3	15.46	5.488	949
1936	20/05/2018 15:00:00	221.559	22.03	58.25	0	2.051	141.1	21.29	3.724	949
1937	20/05/2018 16:00:00	156.439	22.16	58.57	0	1.924	105.1	19.2	3.626	948
1938	20/05/2018 17:00:00	132.296	22.84	60.81	0	1.104	122.5	38.32	2.352	948
1939	20/05/2018 18:00:00	4.49051	19.64	83.5	0	1.033	319	65.23	1.96	948
1940	20/05/2018 19:00:00	0	17.42	90.5	0	0.834	249.1	22.15	1.47	948
1941	20/05/2018 20:00:00	0	16.4	88.2	0	1.325	281.4	9.73	2.156	949
1942	20/05/2018 21:00:00	0	16.12	87.1	0	1.64	282.2	9.13	2.842	949
1943	20/05/2018 22:00:00	0	15.84	86.3	0	1.483	259	17.16	3.234	949
1944	20/05/2018 23:00:00	0	15.93	88.9	0	1.646	257.7	14.66	3.332	949
1945	21/05/2018 00:00:00	0	16.17	84	0	1.817	261	13.74	3.822	949
1946	21/05/2018 01:00:00	0	16.66	85.5	0	1.779	276.6	17.74	3.724	949
1947	21/05/2018 02:00:00	0	15.85	87.1	0	1.9	278.5	16.41	3.234	948
1948	21/05/2018 03:00:00	0	16.09	87.7	0	1.959	250.8	14.29	3.822	948
1949	21/05/2018 04:00:00	0	15	91.1	0	1.448	265.2	17.88	3.136	948
1950	21/05/2018 05:00:00	0	14.97	91.6	0	1.651	274.2	13.39	3.234	948
1951	21/05/2018 06:00:00	0	14.41	92.4	0	1.932	270.6	16.66	3.234	948
1952	21/05/2018 07:00:00	10.1934	13.86	90.8	0	1.414	272	20.76	2.842	949
1953	21/05/2018 08:00:00	106.547	16.52	77.31	0	1.869	283.8	12.19	3.822	949
1954	21/05/2018 09:00:00	368.417	20.05	65.11	0	1.192	306.1	27.99	2.156	949
1955	21/05/2018 10:00:00	540.722	22.57	60.69	0	1.319	308	33.16	3.234	949
1956	21/05/2018 11:00:00	662.148	24.37	54.13	0	1	36.35	63.44	2.646	949
1957	21/05/2018 12:00:00	734.307	25.66	54.88	0	1.445	49.17	44.53	4.312	948
1958	21/05/2018 13:00:00	723.401	26.42	48.1	0	1.637	70.07	37.16	4.312	947
1959	21/05/2018 14:00:00	653.034	27.14	48.4	0	1.921	58.49	35.9	5.194	947
1960	21/05/2018 15:00:00	513.446	27.69	47.99	0	1.885	50.51	33.92	3.822	946
1961	21/05/2018 16:00:00	327.888	27.28	50.02	0	1.99	50.43	23.84	4.998	946
1962	21/05/2018 17:00:00	122.991	26.48	58.18	0	1.367	56.17	22.24	3.136	946
1963	21/05/2018 18:00:00	3.33864	22.56	77.35	0	1.043	69.94	12.61	1.96	946
1964	21/05/2018 19:00:00	0	20.28	82.2	0	1.053	72.99	13.94	2.058	947
1965	21/05/2018 20:00:00	0	19.87	84.4	0	0.8	132.3	29.85	1.568	947
1966	21/05/2018 21:00:00	0	18.37	92.6	0	0.479	160.3	38.04	1.47	947
1967	21/05/2018 22:00:00	0	17.62	93.1	0	0.863	248.3	17.87	1.666	947
1968	21/05/2018 23:00:00	0	17.31	89.4	0	1.099	270.7	14.76	2.156	947
1969	22/05/2018 00:00:00	0	16.15	94	0	1.142	309.4	52.72	2.156	947
1970	22/05/2018 01:00:00	0	15.48	94.2	0	1.775	299.3	16.97	3.92	947
1971	22/05/2018 02:00:00	0	15.52	92.1	0	2.421	278.7	8.86	3.234	947
1972	22/05/2018 03:00:00	0	15.77	91.4	0	2.8	271.3	13.1	4.704	947
1973	22/05/2018 04:00:00	0	15.67	90.2	0	2.477	288.8	12.42	3.822	947
1974	22/05/2018 05:00:00	0	15.07	89	0	2.774	288	13.37	4.214	947
1975	22/05/2018 06:00:00	0	15.79	87	0	3.12	286.8	10.73	5.586	947
1976	22/05/2018 07:00:00	7.41608	16.23	82.3	0	3.262	271.8	11.67	5.292	947
1977	22/05/2018 08:00:00	134.255	18.98	71.71	0	3.011	275.3	15.43	6.076	948
1978	22/05/2018 09:00:00	369.55	21.47	62.57	0	3.887	288.5	13.52	6.762	948
1979	22/05/2018 10:00:00	545.943	24.26	52.73	0	4.252	287.2	14.65	8.04	949
1980	22/05/2018 11:00:00	671.063	26.45	46.61	0	3.857	293.7	15.68	6.958	948
1981	22/05/2018 12:00:00	731.51	28.47	40.14	0	2.453	298	23.01	4.704	948
1982	22/05/2018 13:00:00	719.159	30.16	30.38	0	1.738	292.1	42.48	3.92	947
1983	22/05/2018 14:00:00	649.456	31.09	29.08	0	1.646	274.7	41.71	3.528	946
1984	22/05/2018 15:00:00	515.864	31.54	25.02	0	1.532	308.6	47.43	4.508	946
1985	22/05/2018 16:00:00	328.448	31.4	25.28	0	1.538	357.6	34.96	3.822	946
1986	22/05/2018 17:00:00	123.721	30.63	35.19	0	1.012	11.89	34.22	2.646	946
1987	22/05/2018 18:00:00	3.68589	24.52	60.77	0	0.529	326.8	25.68	1.176	947
1988	22/05/2018 19:00:00	0	21.34	72.02	0	0.663	274.3	44.41	1.96	947
1989	22/05/2018 20:00:00	0	21.18	52.49	0	1.897	197.2	39.83	4.214	948
1990	22/05/2018 21:00:00	0	19.19	74.52	0	1.192	317.2	61.32	2.842	948
1991	22/05/2018 22:00:00	0	17.94	73.73	0	0.865	235.1	31.95	1.862	949
1992	22/05/2018 23:00:00	0	16.87	76.09	0	0.999	229.4	39.32	1.764	949
1993	23/05/2018 00:00:00	0	16.64	78.29	0	1.141	261.5	12.64	2.254	949
1994	23/05/2018 01:00:00	0	15.86	82.8	0	0.605	273.6	23.17	1.372	949
1995	23/05/2018 02:00:00	0	15.2	85.5	0	1.162	279	29.21	2.352	949
1996	23/05/2018 03:00:00	0	15.33	77.16	0	2.597	273.7	25.52	5.978	949
1997	23/05/2018 04:00:00	0	17.62	73.29	0	2.283	225.8	50.89	5.88	949
1998	23/05/2018 05:00:00	0	15.44	83.5	0	3.036	283.5	12.55	5.194	950
1999	23/05/2018 06:00:00	0.124943	15.22	82.3	0	1.466	262.8	12.79	2.744	951
[truncated: 16,046 more rows]
